# Supplementary material for: Denitrogenative hydrofluorination of aromatic aldehyde hydrazones using (difluoroiodo)toluene
Source: Royal Society of Chemistry journal article supplement (doi:10.1039/c6ob02074g), 2016-01-01

## Formal Deoxygenative Hydrofluorination of Aromatic Aldehydes by (Difluoroiodo)toluene

Kaivalya G. Kulkarni, Boris Miokovic, Matthew Sauder and Graham K. Murphy\*

Department of Chemistry, University of Waterloo, 200 University Ave. W, Waterloo, ON, Canada,  
N2L3G1

graham.murphy@uwaterloo.ca

### Supporting Information

#### Table of Contents

|                                                                                            |          |
|--------------------------------------------------------------------------------------------|----------|
| <b>Experimental Details and Characterization Data .....</b>                                | <b>1</b> |
| <b>General details:.....</b>                                                               | <b>1</b> |
| <b>General procedure for hydrazone synthesis: .....</b>                                    | <b>2</b> |
| <b>General procedure for benzyl fluoride synthesis: .....</b>                              | <b>3</b> |
| <b>References:.....</b>                                                                    | <b>5</b> |
| <b><sup>1</sup>H, <sup>13</sup>C and <sup>19</sup>F NMR spectra of new compounds .....</b> | <b>6</b> |

#### Experimental Details and Characterization Data

##### General details:

Reactions were carried out in oven-dried glassware under a positive nitrogen atmosphere, or in 4 mL PFA vials purchased from Elemental Scientific. Transfer of anhydrous solvents and reagents was accomplished with oven-dried syringes. Solvents were dried and purified using a JC Meyer solvent purification system, and were used without further purification. Thin layer chromatography was performed on glass plates pre-coated with 0.25 mm Kieselgel 60 F254 (Silicycle). Flash chromatography columns were packed with 230-400 mesh silica gel (Silicycle). Proton NMR spectra (<sup>1</sup>H NMR) were recorded at 300 or 500 MHz, and are reported (ppm) relative to the residual chloroform peak (7.26 ppm) or dimethylsulfoxide peak (2.50 ppm), and coupling constants (J) are reported in hertz (Hz). Carbon NMR spectra (<sup>13</sup>C NMR) were recorded at 125 or 75 MHz and are reported (ppm) relative to the center line of the triplet from chloroform-d (77.16 ppm). Positive ion electrospray (ESI) and Direct Analysis in Real Time (DART) experiments were performed with a ThermoFisher Scientific Q-Exactive hybrid mass spectrometer. Accurate mass determinations were performed at a mass resolution of 70,000. For ESI, samples were infused at 5mL/min in 1:1 CH<sub>3</sub>OH/H<sub>2</sub>O+0.1% formic acid. Low-resolution mass determinations were carried out on an Agilent 5975B GCMS system.

## General procedure for hydrazone synthesis:

Hydrazones (**13a-o**) were prepared as described in the literature.<sup>1-3</sup> The aldehyde (20mmol) was added to a solution of H<sub>2</sub>NNH<sub>2</sub>•H<sub>2</sub>O (200 mmol, 10 equiv) in ethyl alcohol (20 mL). The reaction mixture was stirred at room temperature for 3 h (unless otherwise mentioned), then the resulting mixture was poured over ice to obtain a precipitate. Suction filtration gave a solid that was air-dried and used in benzylic fluorination reactions without further purification. The hydrazones were identified by comparison of the spectral data and the melting point described in the literature.

**4-nitrobenzylidene hydrazone (13a)** Reaction heated at 50 °C for 1h. Obtained as a yellow solid. Yield 88%, mp 134-136 °C (lit.<sup>2</sup> 134 °C).

**3-nitrobenzylidene hydrazone (13b)** Reaction heated at 50 °C for 1h. Obtained as yellow solid. Yield 87%, mp 107-108 °C (lit.<sup>4</sup> 107 °C).

**2-nitrobenzylidene hydrazone (13c)** Obtained as a yellow solid. Yield 88%, mp 150-152 °C (lit.<sup>5</sup> 152-153 °C).

**4-methyl-3-nitrobenzylidene hydrazone (13d)** Obtained as yellow solid. Yield 91%, mp 186-188 °C; IR (neat): 2979, 1626, 1531, 1447, 1380, 1337, 1292, 1200, 956 cm<sup>-1</sup>; <sup>1</sup>H NMR (500MHz, CDCl<sub>3</sub>, δ ppm): 5.74 (br s, 2H); 7.30 (d, *J* = 7.9 Hz, 1H); 7.68 (d *J* = 7.9 Hz, 1H); 7.71 (s, 1H); 8.08 (s, 1H); <sup>13</sup>C NMR (125MHz, CDCl<sub>3</sub>, δ ppm): 20.3; 122.0; 129.8; 133.0; 133.3; 134.8; 139.6; 149.4; HRMS (ESI): calcd for C<sub>8</sub>H<sub>9</sub>N<sub>3</sub>O<sub>2</sub> [M + H]<sup>+</sup>: 180.0767 found 180.0767.

**4-bromo-3-nitrobenzylidene hydrazone (13e)** Obtained as orange solid. Yield 82%; mp 108-110 °C; IR (neat): 3393, 3286, 1622, 1586, 1528, 1349, 1290, 1219, 955 cm<sup>-1</sup>; <sup>1</sup>H NMR (500MHz, CDCl<sub>3</sub>, δ ppm): 5.84 (br s, 2H); 7.58 (d, *J* = 8.1Hz, 1H); 7.67 (s, 1H); 7.69 (d, *J* = 8.3 Hz, 1H); 7.99 (s 1H); <sup>13</sup>C NMR (125MHz, CDCl<sub>3</sub>, δ ppm): 113.3; 122.5; 129.9; 135.1; 136.3; 137.9; 150.1; HRMS (ESI): calcd for C<sub>7</sub>H<sub>7</sub>BrN<sub>3</sub>O<sub>2</sub> [M + H]<sup>+</sup>: 243.9716 found 243.9716.

**4-carbmethoxybenzylidene hydrazone (13f)** Obtained as white solid. Yield 78%, mp 97-98 °C (lit.<sup>3</sup> 96-97 °C).

**4-cyanobenzylidene hydrazone (13g)** Obtained as white solid. Yield 89%, mp 64-66 °C (lit.<sup>4</sup> 66-67 °C).

**3-cyanobenzylidene hydrazone (13h)** Obtained as white crystals. Yield 77%, mp 80-82 °C (lit.<sup>2</sup> 83-84 °C).

**4-tosyloxybenzylidene hydrazone (13i)** Obtained as brown solid. Yield 92%, mp 172-174°C; IR (neat): 3421, 3300, 2906, 1596, 1498, 1334, 1194, 1180, 1090, 917 cm<sup>-1</sup>; <sup>1</sup>H NMR (500MHz, CDCl<sub>3</sub>, δ ppm): 2.46 (s, 3H); 5.59 (br s, 2H); 6.97 (d, *J* = 8.6 Hz, 2H); 7.32 (d, *J* = 8.1 Hz, 2H); 7.46 (d, *J* = 8.6 Hz, 2H); 7.7 (d, *J* = 8.3 Hz, 2H); 7.72 (s, 1H); <sup>13</sup>C NMR (125MHz, CDCl<sub>3</sub>, δ ppm): 21.7; 122.6; 122.9; 127.2; 128.5; 129.8; 129.9; 132.3; 134.2; 141.1; 145.4; 149.6; HRMS (ESI): C<sub>14</sub>H<sub>15</sub>N<sub>2</sub>O<sub>3</sub>S [M + H]<sup>+</sup>: 291.0796 found 291.0796.

**4-phenylbenzylidene hydrazone (13j)** Obtained as yellow solid. Yield 95%; IR (neat): 3348, 3182, 2914, 1620, 1555, 1484, 1402, 1252, 1076925, 832 cm<sup>-1</sup>; <sup>1</sup>H NMR (500MHz, CDCl<sub>3</sub>, δ ppm): 5.59 (br s, 1H); 7.38 (t, *J* = 7.5 Hz, 1H); 7.48 (t, *J* = 7.5 Hz, 2H); 7.63 (q, *J* = 14.4, 8.3 Hz, 6H ); 7.82 (s, 1H); <sup>13</sup>C NMR (125MHz, CDCl<sub>3</sub>, δ ppm): 126.6; 127.0; 127.3; 127.5; 128.8; 134.2; 140.6; 141.4; 142.7; HRMS (ESI): calcd for C<sub>13</sub>H<sub>13</sub>N<sub>2</sub> [M + H]<sup>+</sup>: 197.1073 found 197.1074.

**3,4-dichlorobenzylidene hydrazone (13k)** Obtained as a white solid. Yield 86%; IR (neat): 3176; 1737; 1594; 174; 1372; 121; 1132; 1027  $\text{cm}^{-1}$ ;  $^1\text{H}$  NMR (300MHz,  $\text{CDCl}_3$ ,  $\delta$  ppm): 5.63 (br s, 2H); 7.41-7.32 (m, 2H); 7.61 (s, 2H);  $^{13}\text{C}$  NMR (125MHz,  $\text{CDCl}_3$ ,  $\delta$  ppm): 125.2; 127.6; 130.5; 132.1; 132.8; 135.4; 139.8.

**3-benzyloxybenzylidene hydrazone (13o)** Obtained as white crystals. Yield 82%; mp 62-64  $^\circ\text{C}$ ; IR (neat): 3348, 3183, 3034, 1620, 1650, 1590, 185, 103, 1070, 925, 832  $\text{cm}^{-1}$ ;  $^1\text{H}$  NMR (500MHz,  $\text{CDCl}_3$ ,  $\delta$  ppm): 5.12 (s, 2H); 5.56 (br s, 2H); 6.96 (dd,  $J = 6, 5$  Hz, 1H); 7.13 (d,  $J = 8$  Hz, 1H); 7.28 (s, 1H); 7.29 (d,  $J = 0.5$  Hz, 1H); 7.37 (d,  $J = 7.5$  Hz, 1H); 7.42 (t,  $J = 7.5$  Hz, 2H); 7.48 (d,  $J = 6$  Hz, 2H); 7.75 (s, 1H);  $^{13}\text{C}$  NMR (125MHz,  $\text{CDCl}_3$ ,  $\delta$  ppm): 70.0; 111.3; 116; 119.5; 127.6; 128.0; 128.6; 129.6; 136.6; 136.9; 142.9; 159.1; HRMS (ESI): calcd for  $\text{C}_{15}\text{H}_{14}\text{N}_2\text{O}$   $[\text{M} + \text{H}]^+$ : 227.1178 found 227.1178.

**2-bromo-5-methoxybenzylidene hydrazone (13p)**: Obtained as a white solid. Yield 69%; IR (neat): 3292, 2937; 2837; 1616; 1592; 177; 1407; 1317; 1264; 1181; 1128; 1025  $\text{cm}^{-1}$ ;  $^1\text{H}$  NMR (300MHz,  $\text{CDCl}_3$ ,  $\delta$  ppm): 3.82 (s, 3H); 5.63 (br s, 2H); 6.74 (d,  $J = 8.4$  Hz, 1H); 7.34 (d,  $J = 8.4$  Hz, 1H); 7.91 (s, 1H); 8.04 (s, 1H);  $^{13}\text{C}$  NMR (125MHz,  $\text{CDCl}_3$ ,  $\delta$  ppm): 55.8; 112.7; 113.5; 125.7; 128.3; 132.0 137.2; 155.8.

## General procedure for benzyl fluoride synthesis:

A 4 mL PFA (Teflon) vial containing (difluoroiodo)toluene (1.7 equiv) was placed under nitrogen and immersed in a pre-heated 40  $^\circ\text{C}$  bath. To this was added a pre-made solution of hydrazone **13** (50 mg, 1.0 equiv) in  $\text{CH}_2\text{Cl}_2$  (1.5 mL) via a syringe pump over  $\sim 10$  minutes. The reaction was monitored by TLC analysis, and upon consumption of the hydrazone (5-10 min), the reaction mixture was cooled to RT and concentrated by rotary evaporation. The resulting crude reaction mixture was purified by flash silica gel chromatography (EtOAc in hexanes or EtOAc in benzene) to provide the benzyl fluorides **10**.

**1-(fluoromethyl)-4-nitrobenzene (10a)**:<sup>6</sup> Obtained as a white crystalline solid (35 mg, 74 %);  $R_f$ : 0.3 (1/9 Ethyl acetate/Hexane); IR (neat): 3115; 3086; 1935; 1605; 1504; 1347; 1012; 838  $\text{cm}^{-1}$ ;  $^1\text{H}$  NMR (500MHz,  $\text{CDCl}_3$ ,  $\delta$  ppm): 5.49 (d,  $J = 46.7$  Hz, 2H); 7.51 (d,  $J = 8.1$  Hz, 2H); 8.23 (d,  $J = 8.1$  Hz, 2H);  $^{13}\text{C}$  NMR (75MHz,  $\text{CDCl}_3$ ,  $\delta$  ppm): 82.8 (d,  $J = 170.5$  Hz, 1C); 123.7; 126.9 (d,  $J = 7.1$  Hz, 2C); 143.3 (d,  $J = 17.7$  Hz, 1C); 147.8;  $^{19}\text{F}$  NMR (300MHz,  $\text{CDCl}_3$ ,  $\delta$  ppm): -215.91; GC-MS (EI) 153.9 (M-H)<sup>+</sup>.

**1-(fluoromethyl)-3-nitrobenzene (10b)**: Obtained as a yellow liquid (33 mg, 71 %); IR (neat): 3094; 2960; 1526; 1349; 1218; 989; 892; 804  $\text{cm}^{-1}$ ;  $^1\text{H}$  NMR (300MHz,  $\text{CDCl}_3$ ,  $\delta$  ppm): 5.48 (d,  $J = 46.9$  Hz, 2H); 7.59 (t,  $J = 7.8$  Hz, 1H); 7.69 (d,  $J = 7.8$  Hz, 1H); 8.21 (apparent d,  $J = \text{Hz}$ , 2H);  $^{13}\text{C}$  NMR (125MHz,  $\text{CDCl}_3$ ,  $\delta$  ppm): 83.0 (d,  $J = 170.5$  Hz, 1C); 121.8 (d,  $J = 7.2$  Hz, 1C); 123.5 (d,  $J = 1.8$  Hz, 1C); 129.7; 132.5 (d,  $J = 6.3$  Hz, 1C); 138.3 (d,  $J = 18.4$  Hz, 1C); 148.4;  $^{19}\text{F}$  NMR (300MHz,  $\text{CDCl}_3$ ,  $\delta$  ppm): -212.59; GC-MS (EI) 153.9 (M-H)<sup>+</sup>.

**1-(fluoromethyl)-2-nitrobenzene (10c)**:<sup>6</sup> Obtained as a white solid (30 mg, 64%); IR (neat): 2925; 1616; 1522; 1341; 1009; 858  $\text{cm}^{-1}$ ;  $^1\text{H}$  NMR (300MHz,  $\text{CDCl}_3$ ,  $\delta$  ppm): 5.89 (d,  $J = 47.9$  Hz, 2H); 7.53 (t,  $J = 8.0$  Hz, 1H); 7.77 (t,  $J = 7.7$  Hz, 1H); 7.83 (d,  $J = 7.7$  Hz, 1H); 8.24 (d,  $J = 8.1$  Hz, 1H);  $^{13}\text{C}$  NMR (125MHz,  $\text{CDCl}_3$ ,  $\delta$  ppm): 81.3 (d,  $J = 172.8$  Hz, 1C); 124.9, 126.8 (d,  $J = 17.6$  Hz, 1C); 128.6, 134.3, 134.4, 145.6;  $^{19}\text{F}$  NMR (300MHz,  $\text{CDCl}_3$ ,  $\delta$  ppm): -219.4; GC-MS (EI) 155.0 (M)<sup>+</sup>.

**4-(fluoromethyl)-1-methyl-2-nitrobenzene (10d)**: Obtained as a colourless liquid (24mg, 51%); IR (neat): 2933; 1527; 1497; 1344; 1221; 986; 812  $\text{cm}^{-1}$ ;  $^1\text{H}$  NMR (300MHz,  $\text{CDCl}_3$ ,  $\delta$  ppm): 2.6 (s, 3H); 5.40 (d,  $J = 47.2$  Hz, 2H); 7.37 (d,  $J = 7.8$  Hz, 1H); 7.50 (d,  $J = 7.8$  Hz, 1H); 7.97 (s, 1H);  $^{13}\text{C}$  NMR (125MHz,  $\text{CDCl}_3$ ,  $\delta$  ppm): 20.2, 82.9 (d,  $J = 169.2$ Hz, 1C); 123.3 (d,  $J = 6.8$  Hz, 1C); 131.5 (d,  $J = 5.9$

Hz, 1C); 133.2; 133.9 (d,  $J = 2.5$  Hz, 1C); 135.6 (d,  $J = 18.3$  Hz, 1C); 149.2;  $^{19}\text{F}$  NMR (300MHz,  $\text{CDCl}_3$ ,  $\delta$  ppm): -210.66; GC-MS (EI) 169.1 ( $\text{M}^+$ ).

**1-bromo-4-(fluoromethyl)-2-nitrobenzene (10e)**: Obtained as a yellow liquid (34 mg, 71%); IR (neat): 3073; 2959; 1606; 1532; 1475; 1352; 1031; 891; 827; 804  $\text{cm}^{-1}$ ;  $^1\text{H}$  NMR (300MHz,  $\text{CDCl}_3$ ,  $\delta$  ppm): 5.39 (d,  $J = 46.8$  Hz, 2H); 7.41 (d,  $J = 8.2$  Hz, 1H); 7.75 (d,  $J = 8.2$  Hz, 1H); 7.97 (s, 1H);  $^{13}\text{C}$  NMR (125MHz,  $\text{CDCl}_3$ ,  $\delta$  ppm): 82.2 (d,  $J = 171.2$  Hz, 1C); 114.46, 123.8, 131.2, 135.4, 137.5, 149.9;  $^{19}\text{F}$  NMR (300MHz,  $\text{CDCl}_3$ ,  $\delta$  ppm): -213.86; HRMS (DART 300  $^\circ\text{C}$ ): calcd for  $\text{C}_7\text{H}_6\text{O}_2\text{NBrF}$  [ $\text{M}+\text{H}$ ] $^+$ : 233.9561 found 233.9559.

**methyl 4-(fluoromethyl)benzoate (10f)**<sup>7</sup>: Obtained as a pale yellow liquid (30 mg, 64%); IR (neat): 2926; 2854; 1720; 1435; 1275; 1177; 1106; 1016  $\text{cm}^{-1}$ ;  $^1\text{H}$  NMR (300MHz,  $\text{CDCl}_3$ ,  $\delta$  ppm): 3.90 (s, 3H); 5.43 (d,  $J = 47.2$  Hz, 2H); 7.41 (d,  $J = 7.8$  Hz, 2H); 8.04 (d,  $J = 7.8$  Hz, 2H);  $^{13}\text{C}$  NMR (125MHz,  $\text{CDCl}_3$ ,  $\delta$  ppm): 52.1; 86.6 (d,  $J = 168.8$  Hz, 1C); 126.6 (d,  $J = 6.7$  Hz, 2C); 129.8 (d,  $J = 2.3$  Hz, 2C); 130.4; 141.2 (d,  $J = 17.2$  Hz, 1C); 166.6;  $^{19}\text{F}$  NMR (300MHz,  $\text{CDCl}_3$ ,  $\delta$  ppm): -213.13; GC-MS (EI) 168.12 ( $\text{M}^+$ ).

**4-(fluoromethyl)benzotrile (10g)**<sup>7</sup>: Obtained as a yellow liquid (33 mg, 71%). IR (neat): 2926; 2230; 1416; 1378; 1214; 1012; 817  $\text{cm}^{-1}$ ;  $^1\text{H}$  NMR (300MHz,  $\text{CDCl}_3$ ,  $\delta$  ppm): 5.44 (d,  $J = 46.8$  Hz, 2H); 7.45 (d,  $J = 7.8$  Hz, 2H); 7.67 (d,  $J = 7.8$  Hz, 2H);  $^{13}\text{C}$  NMR (125MHz,  $\text{CDCl}_3$ ,  $\delta$  ppm): 83.1 (d,  $J = 170.5$  Hz, 1C); 112.5; 118; 127.5 (d,  $J = 65.4$  Hz, 2C); 132.4; 141.5 (d,  $J = 17.9$  Hz, 1C);  $^{19}\text{F}$  NMR (300MHz,  $\text{CDCl}_3$ ,  $\delta$  ppm): -215.44; GC-MS (EI): 135.15 ( $\text{M}^+$ ).

**3-(fluoromethyl)benzotrile (10h)**<sup>8</sup>: Obtained as a yellow liquid; 20:1 mixture of **10h**:**16h** (34 mg, 73 %). IR (neat): 2923; 2231; 1485; 1378; 1151; 985; 891  $\text{cm}^{-1}$ ;  $^1\text{H}$  NMR (500MHz,  $\text{CDCl}_3$ ,  $\delta$  ppm): 5.41 (d,  $J = 47.1$  Hz, 2H); 6.67\* (t,  $J = 56.1$  Hz, 0.06H); 7.49 (t,  $J = 7.7$  Hz, 1H); 7.59 (d,  $J = 7.7$  Hz, 1H); 7.63 (d,  $J = 3.2$  Hz, 2H); 7.76 (t,  $J = 8.8$  Hz, 0.09H); 7.81 (s, 0.05H);  $^{13}\text{C}$  NMR (125MHz,  $\text{CDCl}_3$ ,  $\delta$  ppm): 82.9 (d,  $J = 170.2$  Hz, 1C); 113.0; 118.3; 129.5; 130.4; 131.1; 132.2; 137.9 (d,  $J = 18.0$  Hz, 1C);  $^{19}\text{F}$  NMR (300MHz,  $\text{CDCl}_3$ ,  $\delta$  ppm): -212.64 (**16h**: -112.73); GC-MS (EI): 135.15 ( $\text{M}^+$ ).

**4-(fluoromethyl)phenyl 4-methylbenzenesulfonate (10i)**: Obtained as a colourless gum (29 mg, 60%), IR (neat): 2926; 1597; 1504; 1370; 1197; 117; 1152; 1092  $\text{cm}^{-1}$ ;  $^1\text{H}$  NMR (300MHz,  $\text{CDCl}_3$ ,  $\delta$  ppm): 2.43 (s, 3H); 5.32 (d,  $J = 47.5$  Hz, 2H); 6.99 (d,  $J = 8.3$  Hz, 2H); 7.31-7.24 (m, 4H); 7.68 (d,  $J = 8.3$  Hz, 2H);  $^{13}\text{C}$  NMR (125MHz,  $\text{CDCl}_3$ ,  $\delta$  ppm): 21.7; 83.6 (d,  $J = 167.4$  Hz, 1C); 122.6; 128.5; 128.6 (d,  $J = 5.9$  Hz, 2C); 129.8; 132.3; 135.2 (d,  $J = 17.5$  Hz, 1C); 145.5; 149.7;  $^{19}\text{F}$  NMR (300MHz,  $\text{CDCl}_3$ ,  $\delta$  ppm): -208.45; GC-MS (EI) 280.1 ( $\text{M}^+$ ).

**4-(fluoromethyl)-1,1'-biphenyl (10j)**<sup>7</sup>: Obtained as a white solid (24mg, 51%); IR (neat): 2921; 180; 1686; 1486; 1077; 1005; 823  $\text{cm}^{-1}$ ;  $^1\text{H}$  NMR (300MHz,  $\text{CDCl}_3$ ,  $\delta$  ppm): 5.43 (d,  $J = 47.1$ Hz, 2H); 7.37 (t,  $J = 7.4$  Hz, 1H); 7.46 (t,  $J = 7.8$  Hz, 4H); 7.62 (t,  $J = 7.8$  Hz, 4H);  $^{13}\text{C}$  NMR (125MHz,  $\text{CDCl}_3$ ,  $\delta$  ppm): 84.4 (d,  $J = 166$ Hz, 1C); 127.2, 127.4 (d,  $J = 1.7$  Hz, 2C); 127.6; 128.1 (d,  $J = 6.0$  Hz, 1C); 128.9; 135.1; 140.6; 141.8;  $^{19}\text{F}$  NMR (300MHz,  $\text{CDCl}_3$ ,  $\delta$  ppm): -206.39; GC-MS (EI pos.): 186.1 ( $\text{M}^+$ ).

**1,2-dichloro-4-(fluoromethyl)benzene (10k)**<sup>8</sup>: Obtained as a colourless liquid (32mg, 68%); IR (neat): 2924; 1598; 1473; 1212; 1131; 1032; 1007; 874; 816  $\text{cm}^{-1}$ ;  $^1\text{H}$  NMR (300MHz,  $\text{CDCl}_3$ ,  $\delta$  ppm): 5.31 (d,  $J = 47.3$  Hz, 2H); 7.18 (d,  $J = 2.2$  Hz, 1H); 7.44 (s, 1H); 7.5 (d,  $J = 2.2$  Hz, 1H);  $^{19}\text{F}$  NMR (300MHz,  $\text{CDCl}_3$ ,  $\delta$  ppm): -210.38; GC-MS (EI) 178.0 ( $\text{M}^+$ ).

**1-(methoxy)-3-(fluoromethyl)benzene (10n)**<sup>7</sup>: Obtained as a colourless liquid (16 mg, 33%); IR (neat): 3008; 2959; 2838; 1598; 1587; 1457; 1266; 1156; 1040  $\text{cm}^{-1}$ ;  $^1\text{H}$  NMR (300MHz,  $\text{CDCl}_3$ ,  $\delta$  ppm): 3.82 (s,

3H); 5.36 (d,  $J = 47.7$  Hz, 2H); 6.92 (m, 3H); 7.30 (app. t,  $J = 7.6$  Hz, 1H);  $^{19}\text{F}$  NMR (300MHz,  $\text{CDCl}_3$ ,  $\delta$  ppm): -207.93; GC-MS (EI pos.): 140.05 ( $\text{M}^+$ ).

**1-(benzyloxy)-3-(fluoromethyl)benzene (10o):** Obtained as a white solid (30 mg, 45%); IR (neat): 3033; 2973; 2852; 1693; 1594; 1583; 1447; 1258; 1166; 1025  $\text{cm}^{-1}$ ;  $^1\text{H}$  NMR (300MHz,  $\text{CDCl}_3$ ,  $\delta$  ppm): 5.34 (d,  $J = 47.7$  Hz, 2H); 6.97 (apparent t, 3H); 7.42-7.29 (m, 6H);  $^{13}\text{C}$  NMR (125MHz,  $\text{CDCl}_3$ ,  $\delta$  ppm): 70.1; 84.4 (d,  $J = 166.8$  Hz, 1C); 113.7 (d,  $J = 6.4$  Hz, 1C); 115.2 (d,  $J = 3.0$  Hz, 1C); 119.8 (d,  $J = 5.5$  Hz, 1C); 127.5; 128.1; 128.7; 129.8; 136.9; 137.8 (d,  $J = 17.4$  Hz, 1C);  $^{19}\text{F}$  NMR (300MHz,  $\text{CDCl}_3$ ,  $\delta$  ppm): -208.03; GC-MS (EI pos.): 216.1 ( $\text{M}^+$ ).

**1-bromo-2-(fluoromethyl)-4-methoxybenzene (10p):** Obtained as yellow liquid (22 mg, 47%); IR (neat): 3019; 2920; 1482; 1208; 1111; 1059; 1006  $\text{cm}^{-1}$ ;  $^1\text{H}$  NMR (300MHz,  $\text{CDCl}_3$ ,  $\delta$  ppm): 3.81 (s, 3H); 5.38 (d,  $J = 47.5$  Hz, 2H); 6.75 (d,  $J = 8.7$  Hz, 1H); 7.4 (d,  $J = 8.7$  Hz, 1H); 7.47 (s, 1H);  $^{13}\text{C}$  NMR (125MHz,  $\text{CDCl}_3$ ,  $\delta$  ppm): 55.6; 79.6 (d,  $J = 166.1$  Hz, 1C); 112.0; 112.7; 127.0 (d,  $J = 17.4$  Hz, 1C); 131.2 (d,  $J = 8.9$  Hz, 1C); 132.3 (d,  $J = 3.9$  Hz, 1C); 155.9;  $^{19}\text{F}$  NMR (300MHz,  $\text{CDCl}_3$ ,  $\delta$  ppm): -217.59; GC-MS (EI pos.): 218.0 ( $\text{M}^+$ ).

## References:

1. V. Z. Shirinian, L. I. Belen'kii and M. M. Krayushkin, *Russian Chemical Bulletin*, **48**, 2171-2173.
2. T. Curtius and A. Lublin, *Berichte*, **1900**, *33*, 2460-2466.
3. A. V. Shastin, V. N. Korotchenko, V. G. Nenajdenko and E. S. Balenkova, *Tetrahedron*, **2000**, *56*, 6557-6563.
4. R. L. HINMAN, *J. Org. Chem.* **1960**, *25*, 1775-1778.
5. H. Müller, C. Montigel and T. Reichstein, *Helv. Chim. Acta* **1937**, *20*, 1468-1473.
6. J.-J. Ma, W.-B. Yi, G.-P. Lu and C. Cai, *Org. Biomol. Chem.*, **2015**, *13*, 2890-2894.
7. J. Hu, B. Gao, L. Li, C. Ni and J. Hu, *Org. Lett.* **2015**, *17*, 3086-3089.
8. L. An, Y.-L. Xiao, Q.-Q. Min and X. Zhang, *Angew. Chem. Int. Ed.* **2015**, *54*, 9079-9083.

## $^1\text{H}$ , $^{13}\text{C}$ and $^{19}\text{F}$ NMR spectra of new compounds

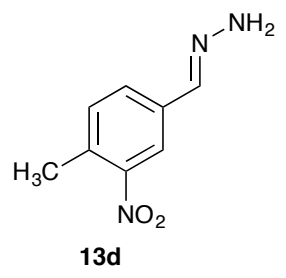

8.08  
7.72  
7.70  
7.68  
7.32  
7.30  
5.74  
2.59

proton 16 scans

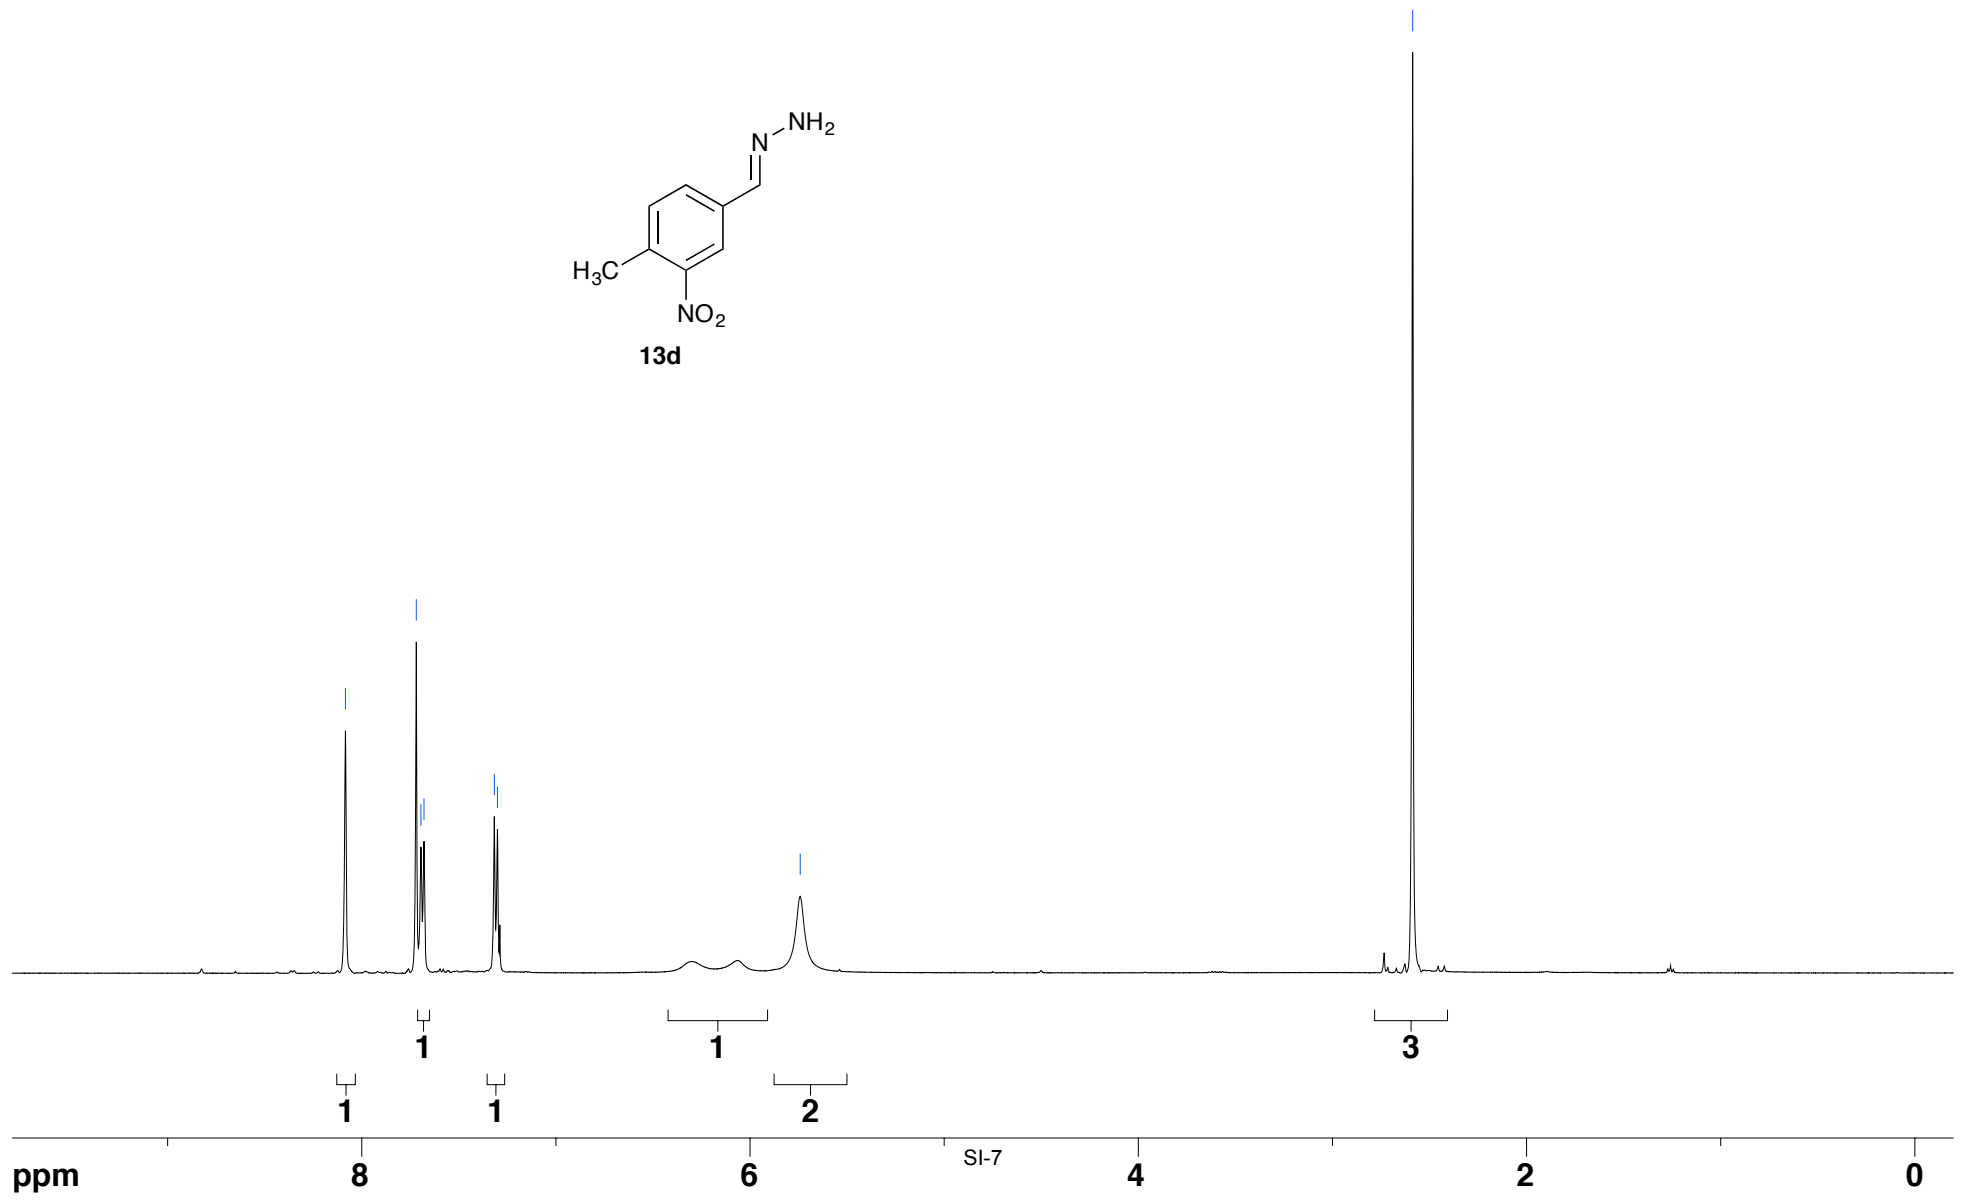

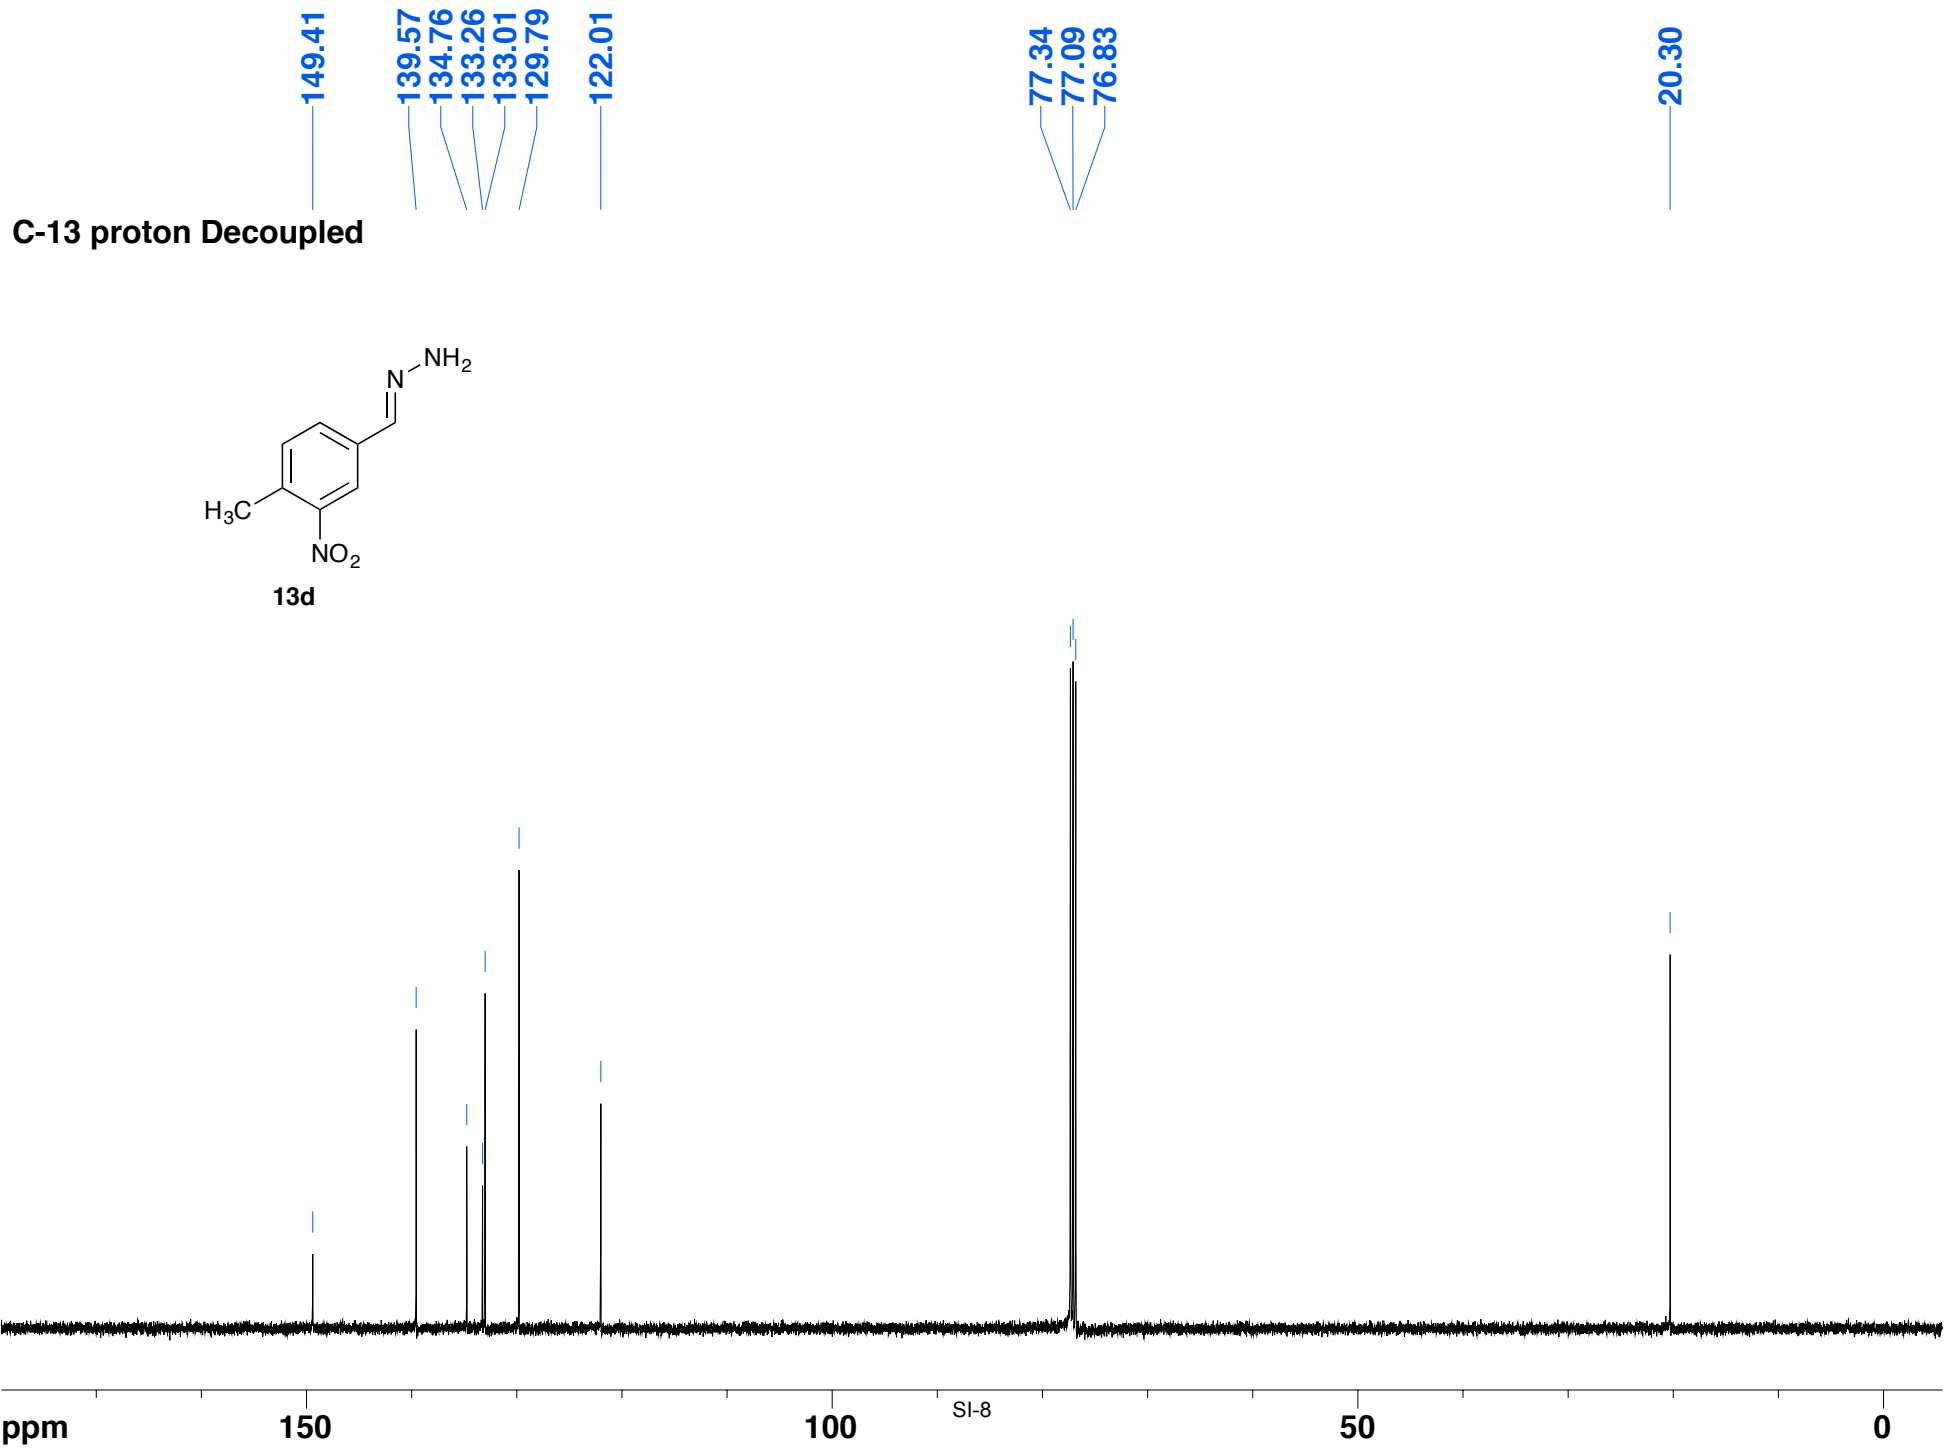



proton 16 scans

7.99  
7.67  
7.60  
7.60  
7.29  
5.84

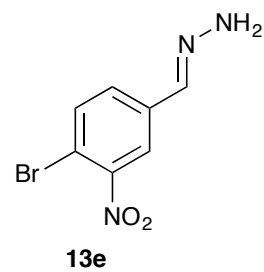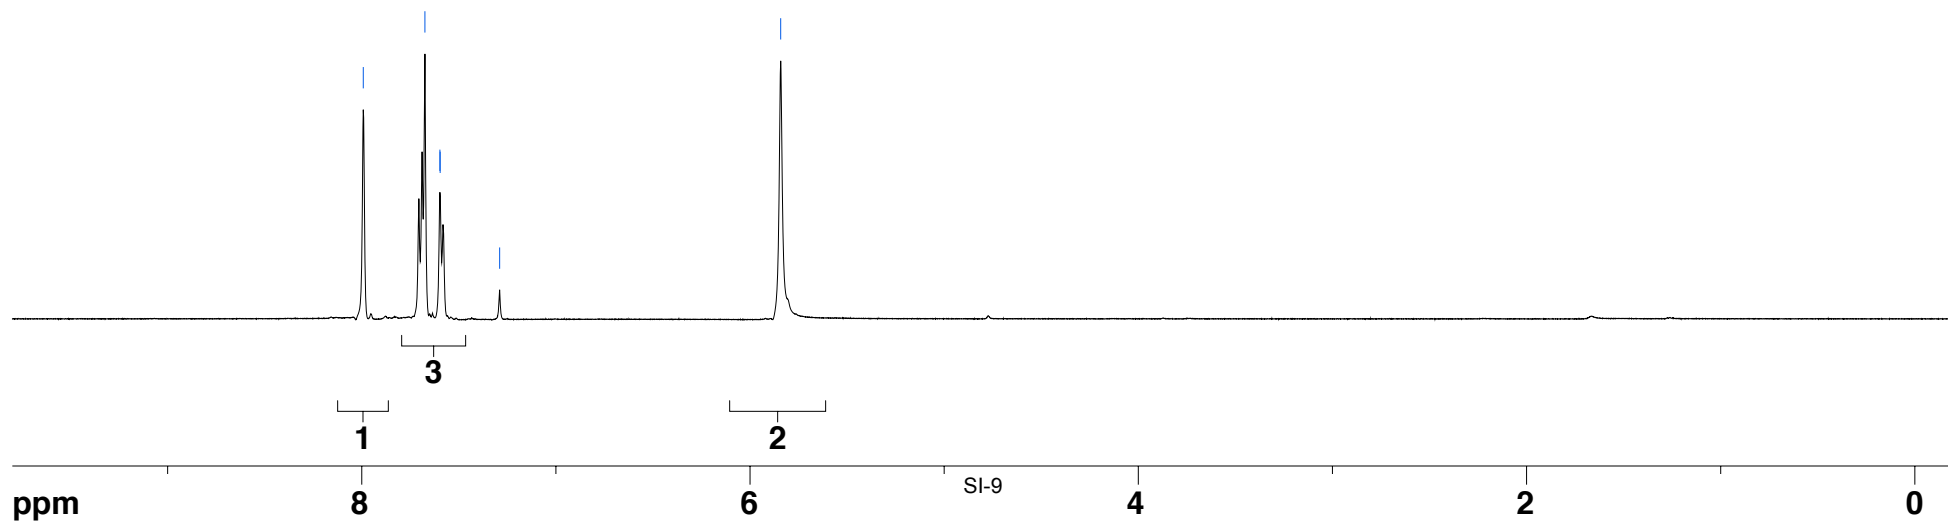

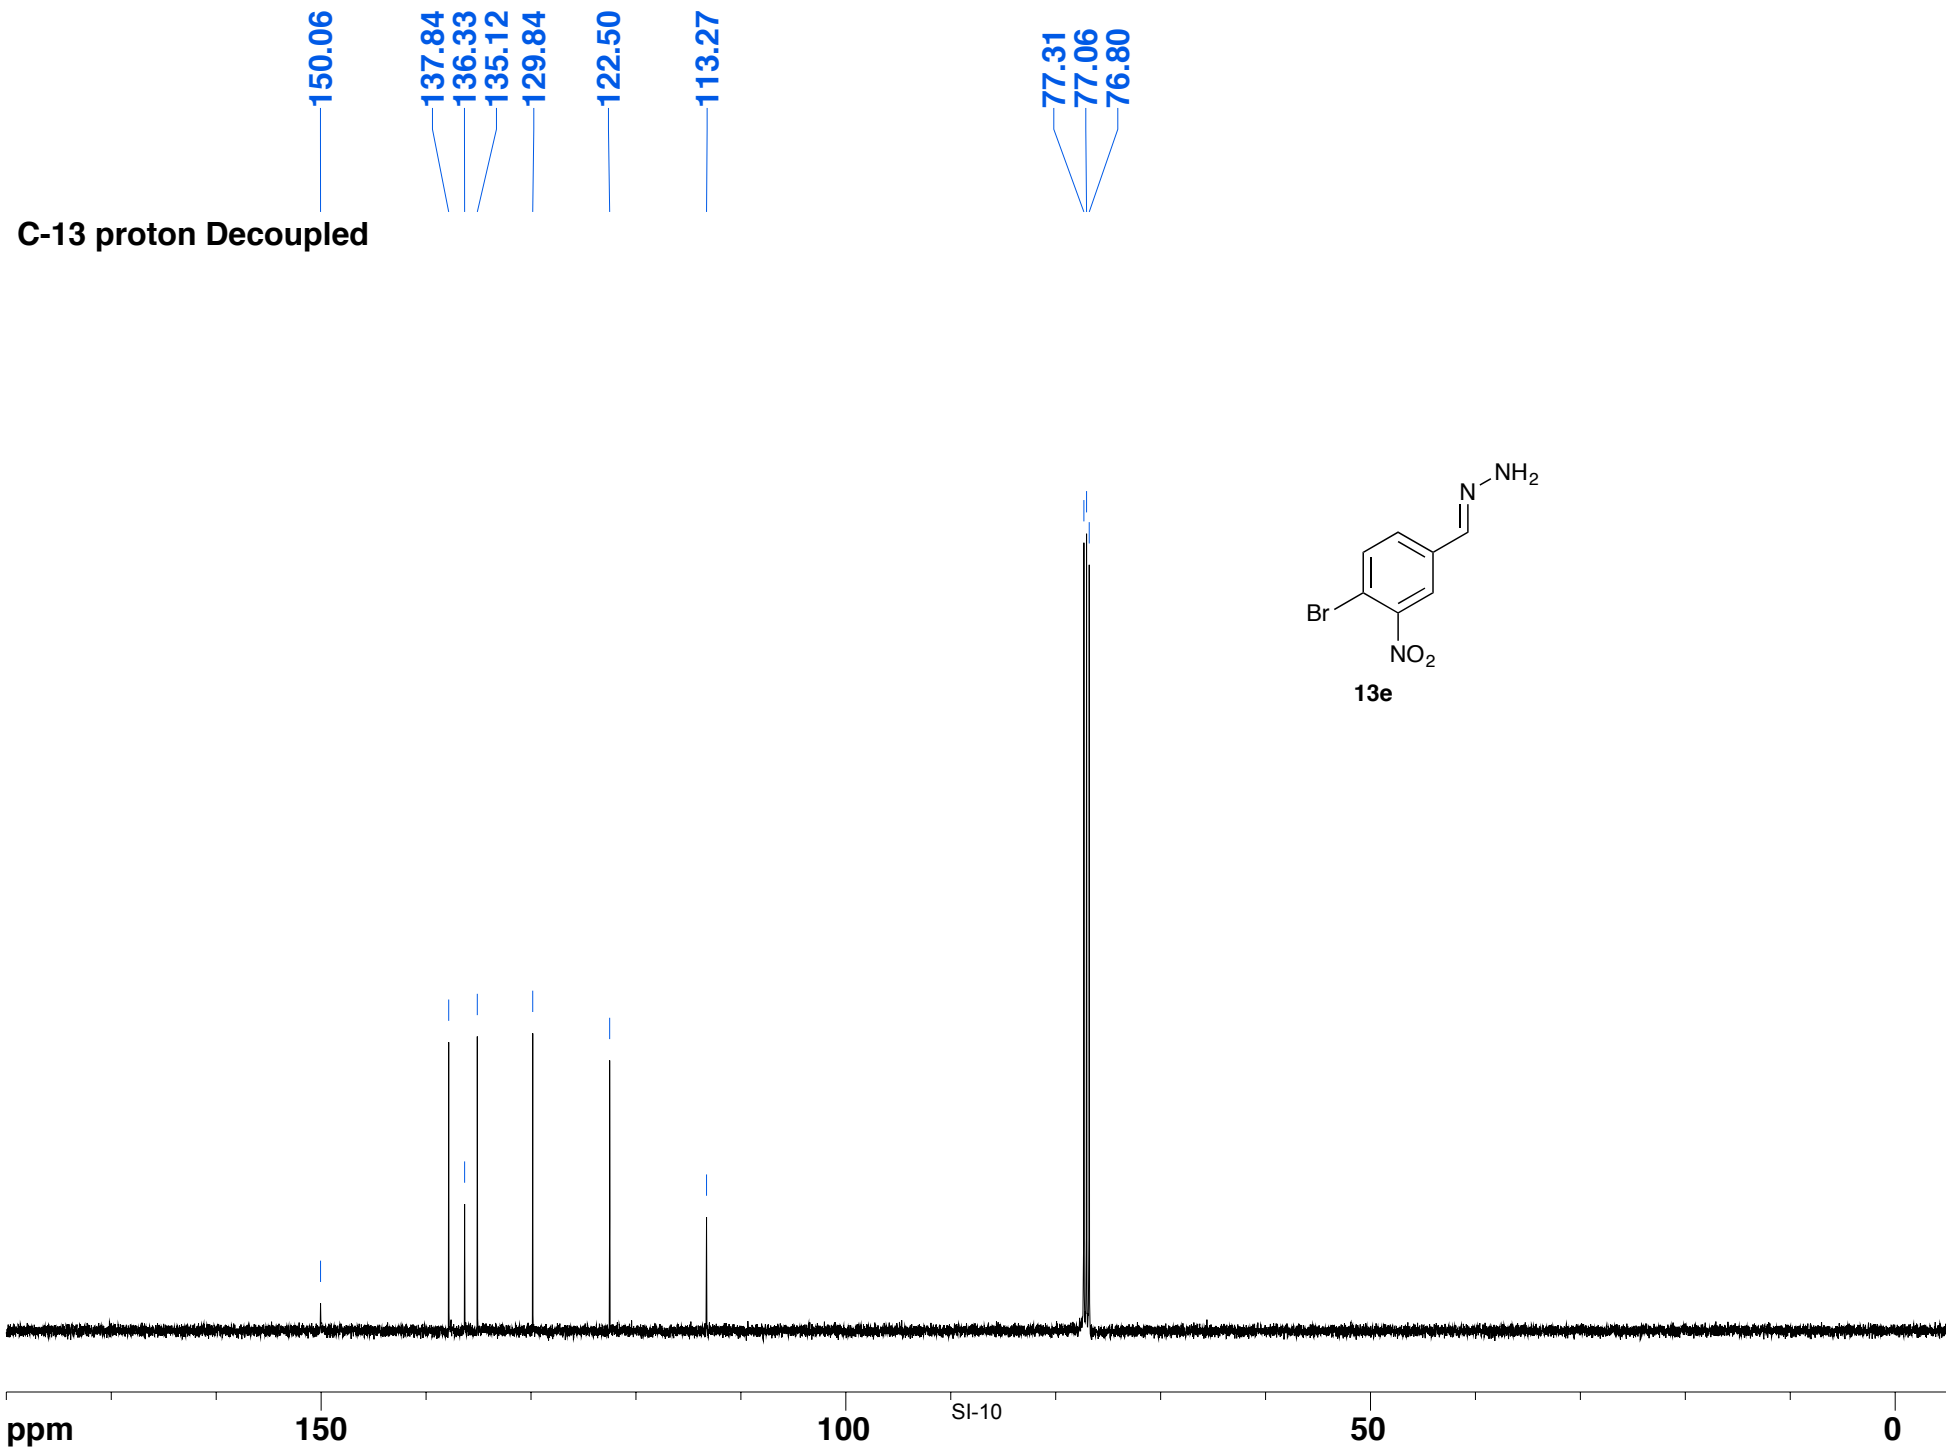

7.72  
7.71  
7.70  
7.48  
7.46  
7.33  
7.31  
6.98  
6.97

5.60  
5.60

2.46

proton 16 scans

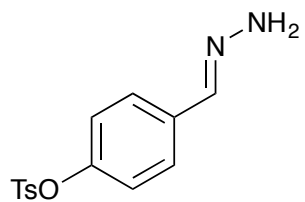

13i

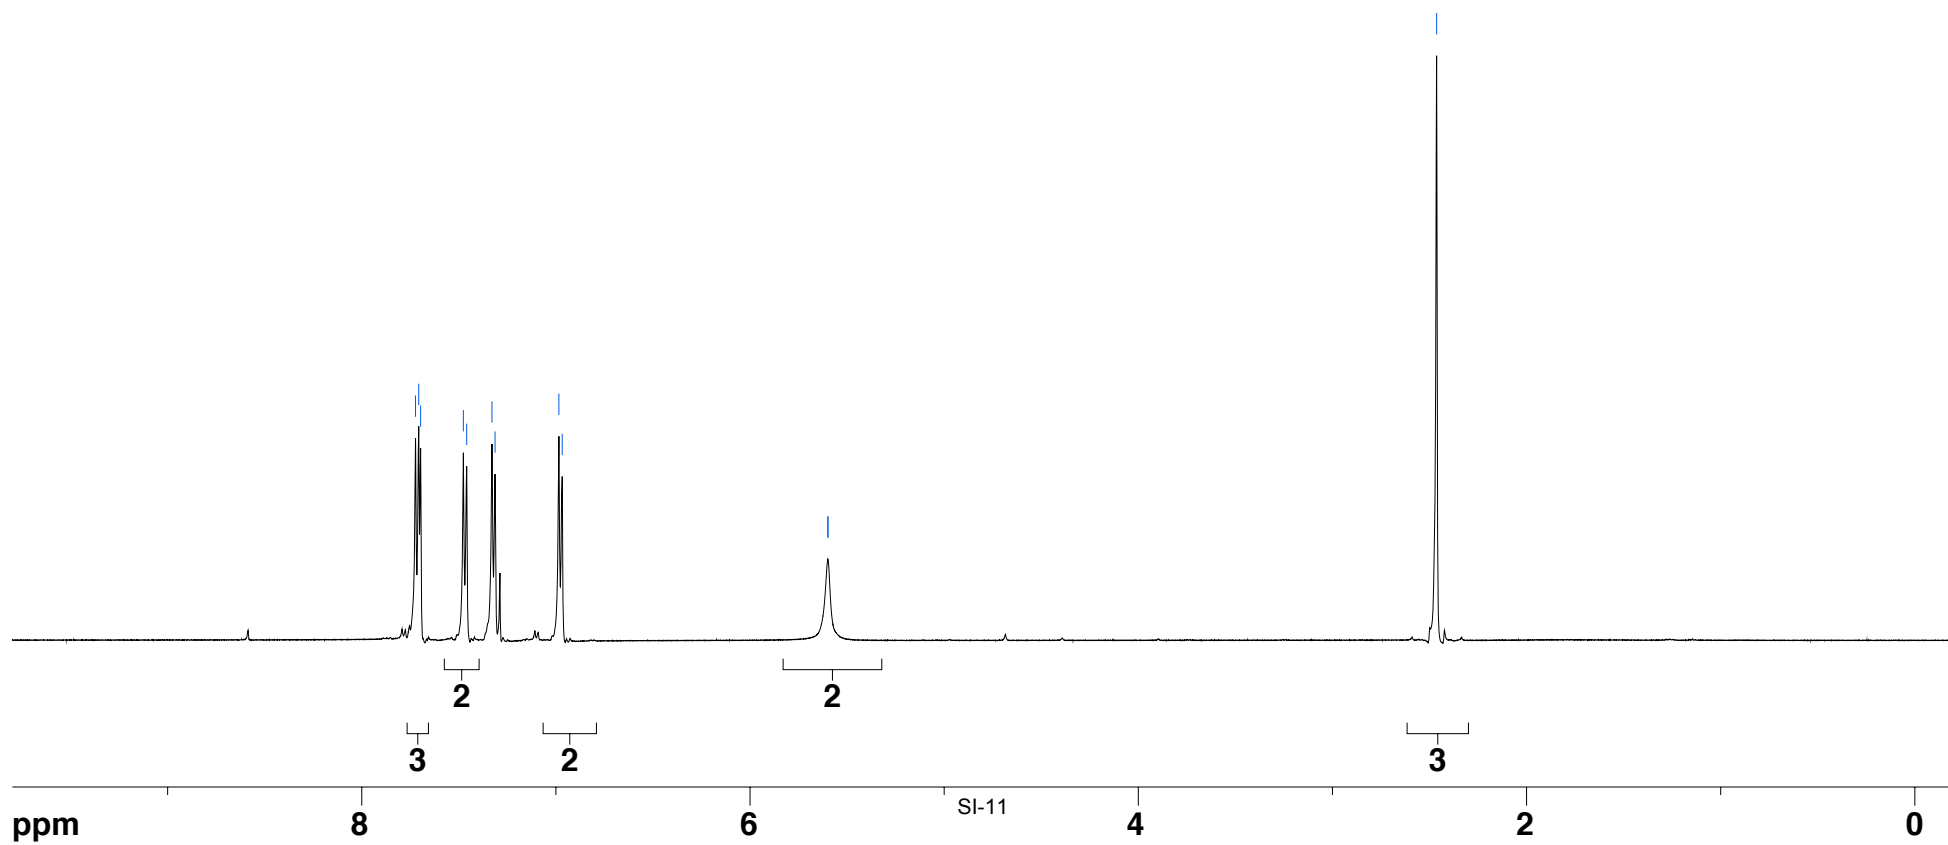

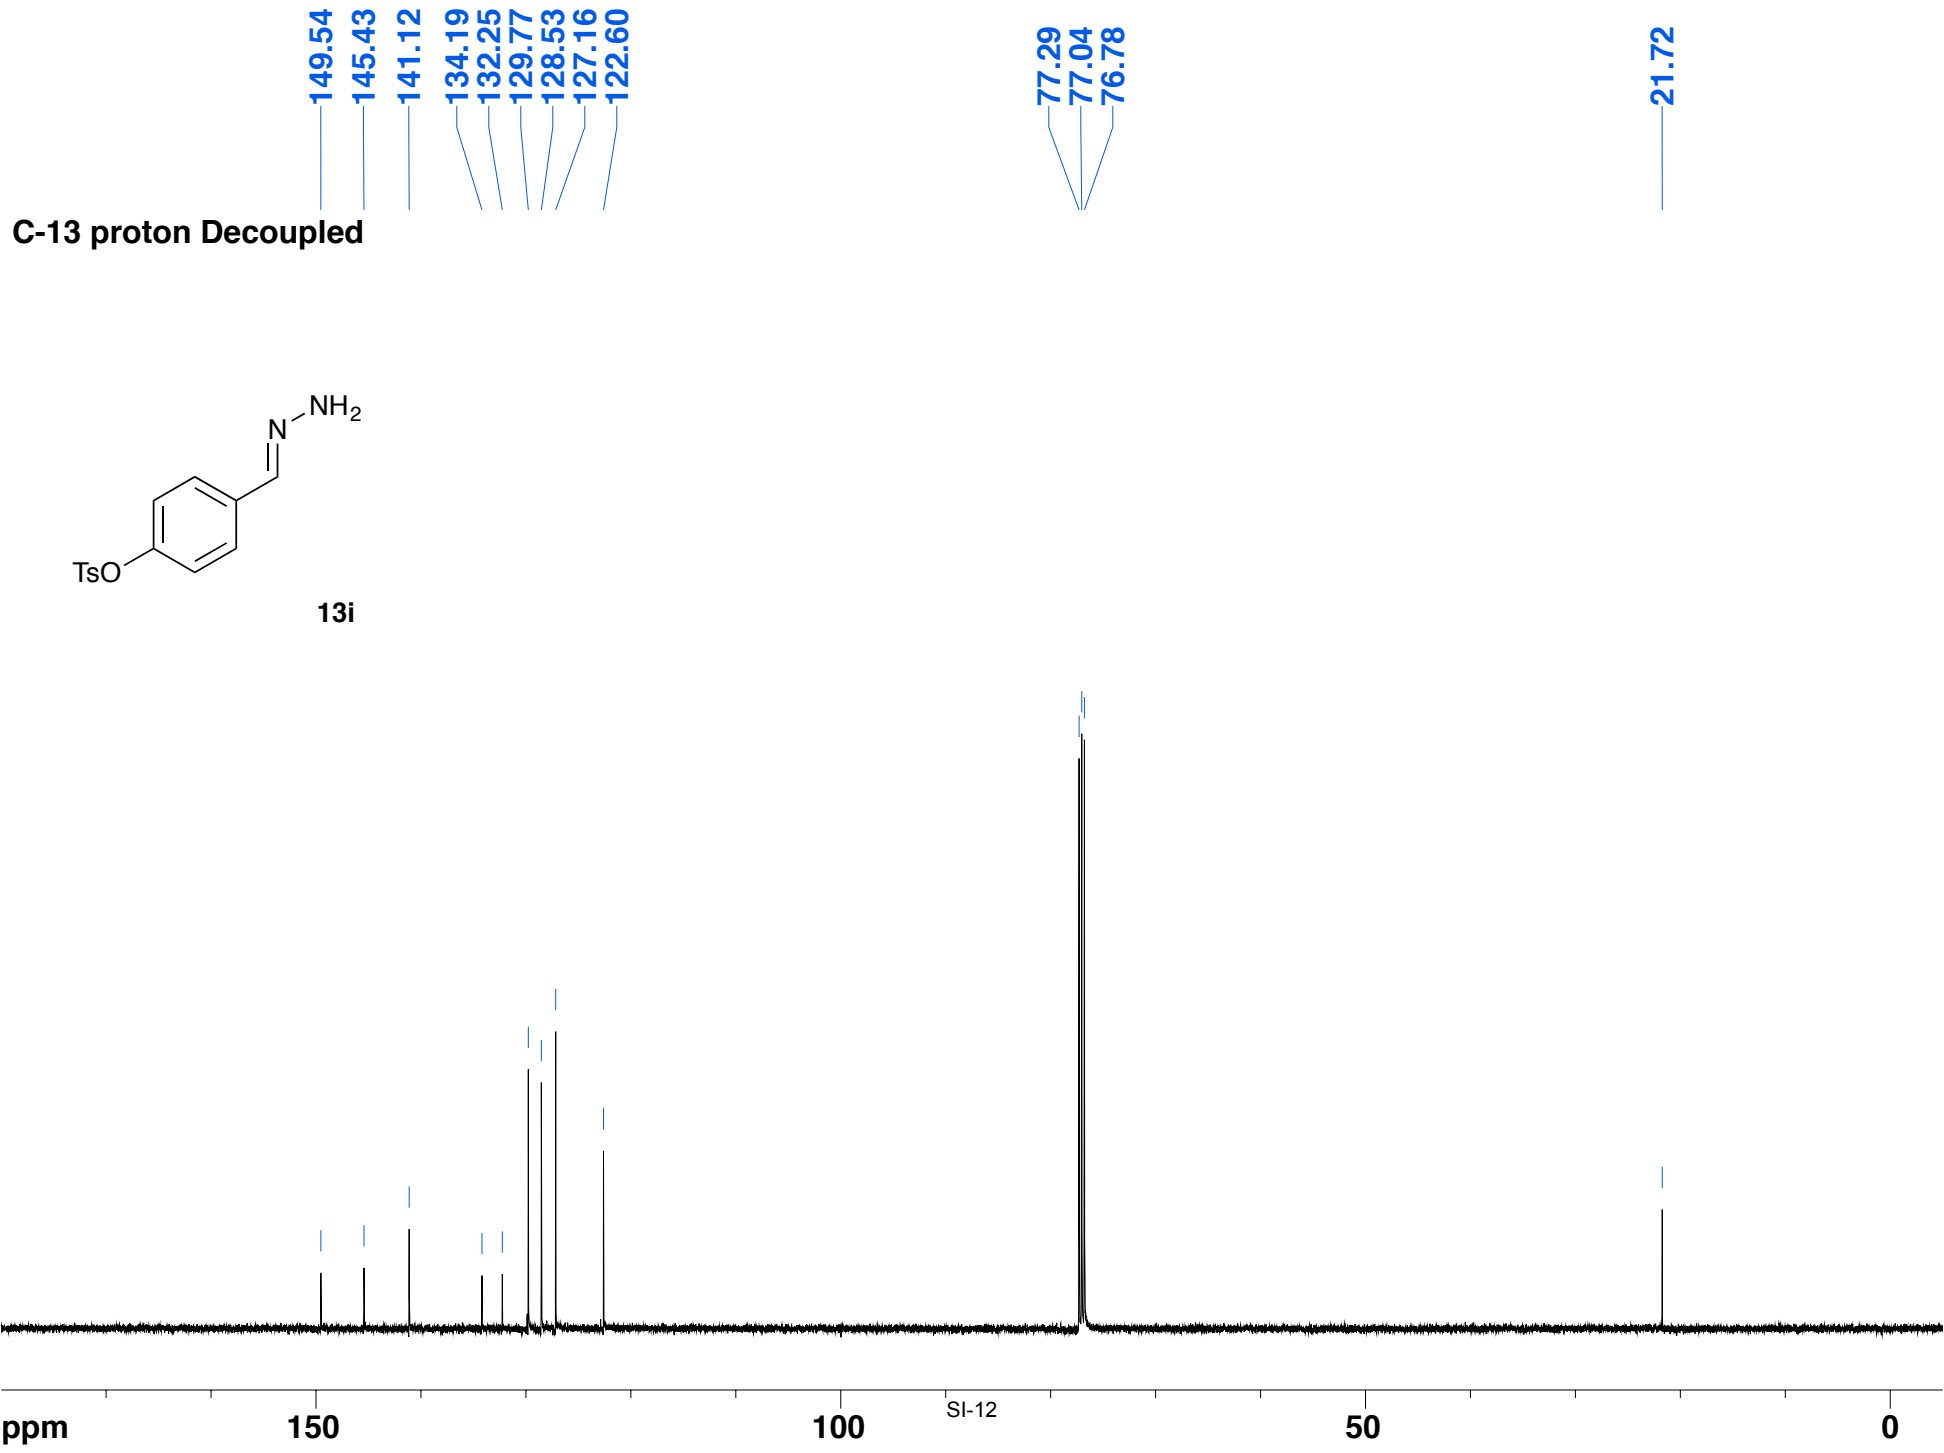

7.82  
7.66  
7.65  
7.64  
7.62  
7.49  
7.48  
7.46  
7.38  
7.29

5.59

proton 16 scans

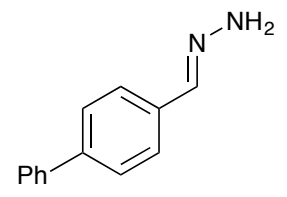

13j

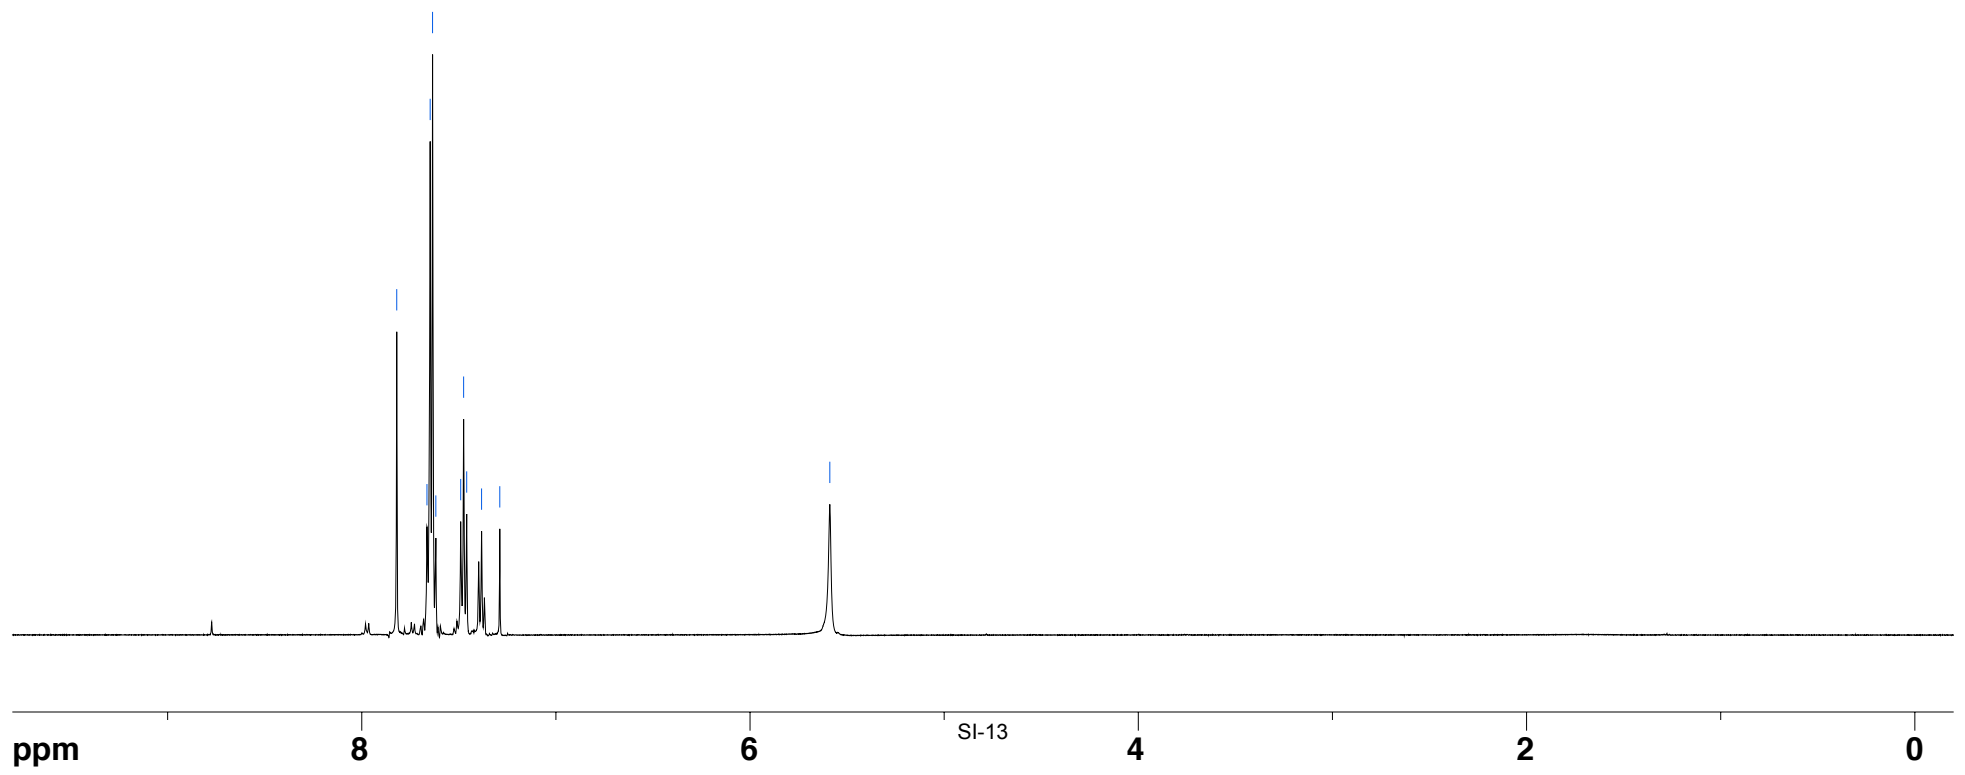

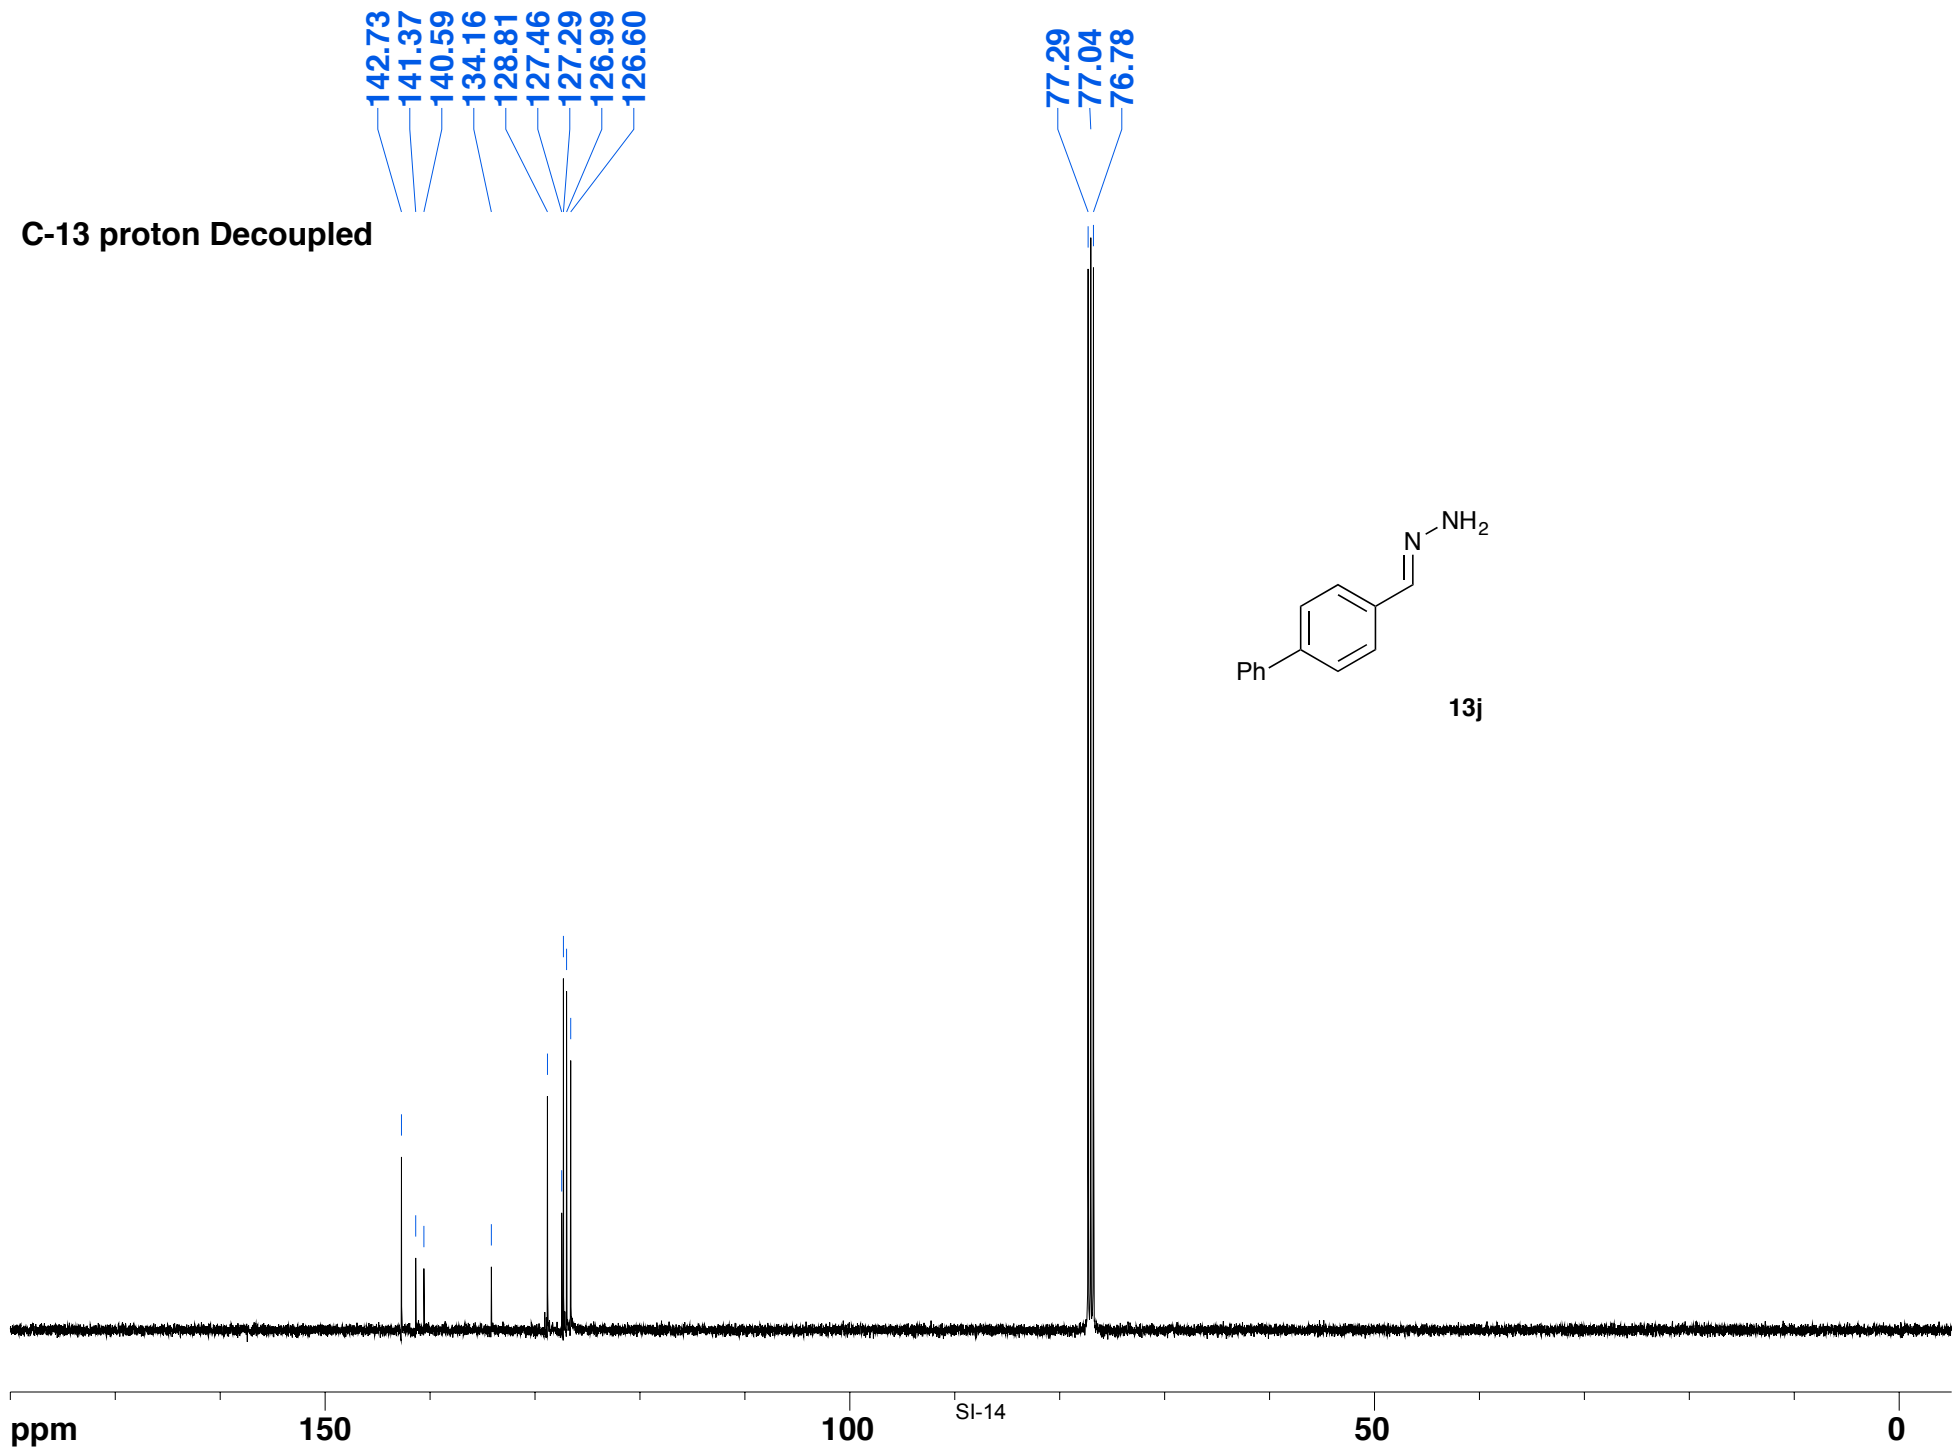

**C-13 proton Decoupled**

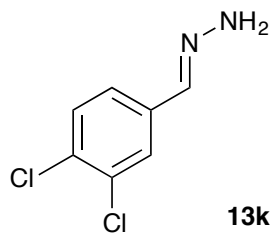

139.74  
135.35  
132.81  
132.12  
130.52  
127.61  
125.14

77.31  
77.06  
76.81

ppm 200 150 100 50 0

SI-15

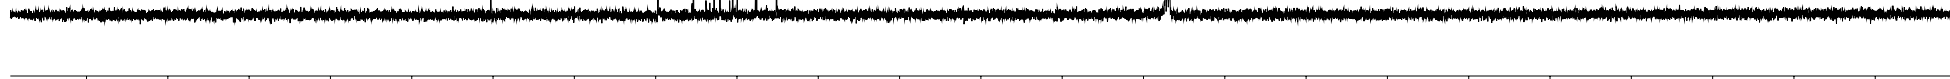

7.75  
7.47  
7.42  
7.28  
6.98

5.56

5.12

proton 16 scans

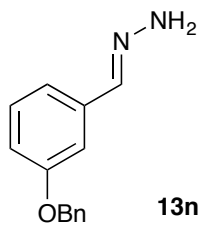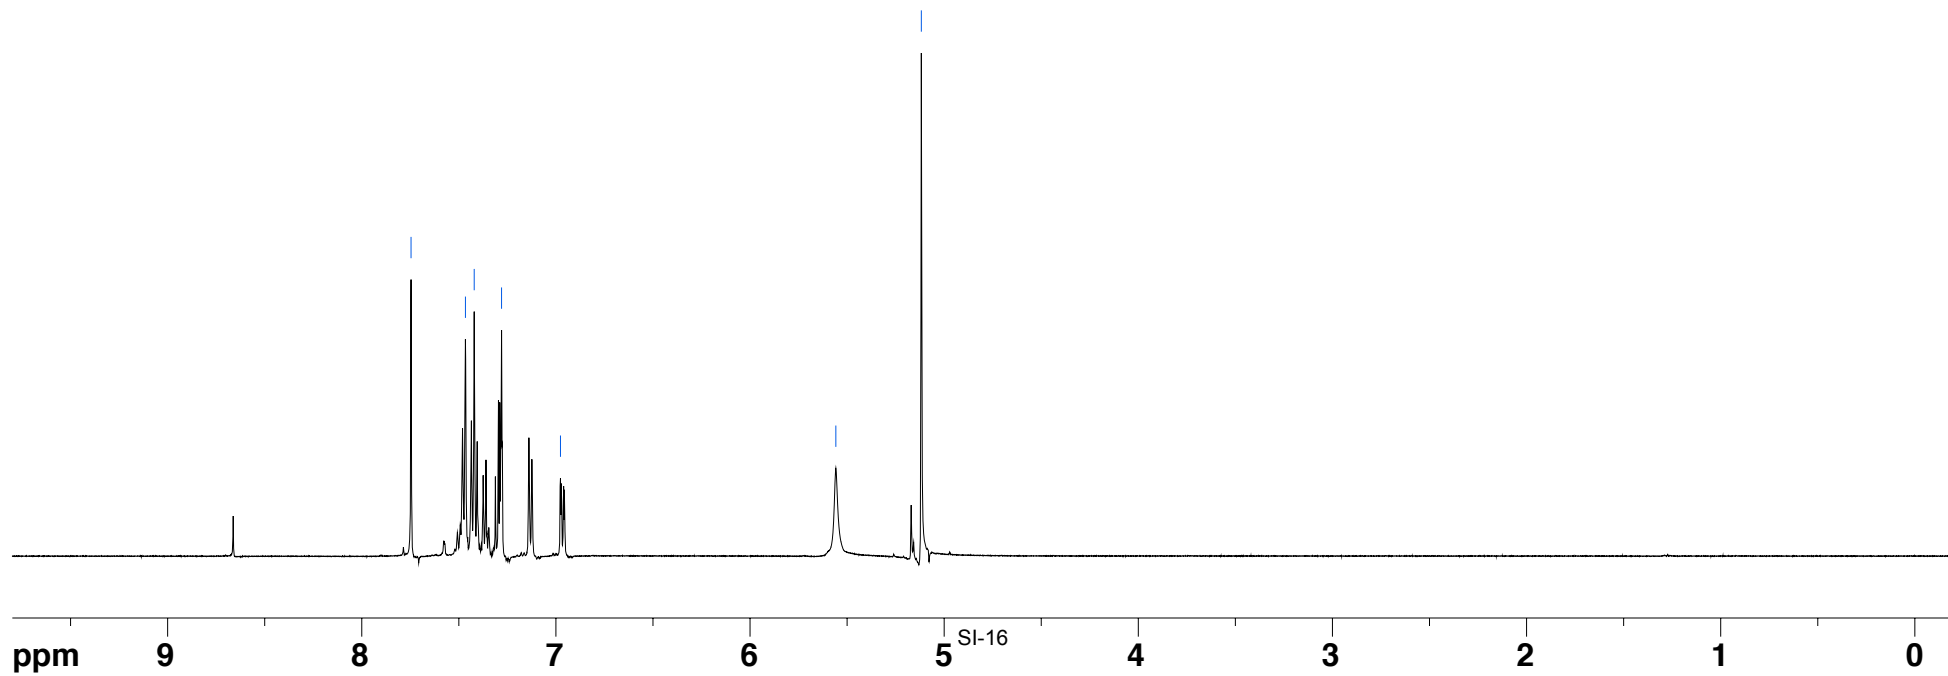



C-13 proton Decoupled

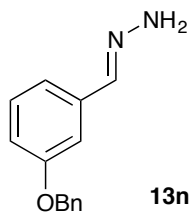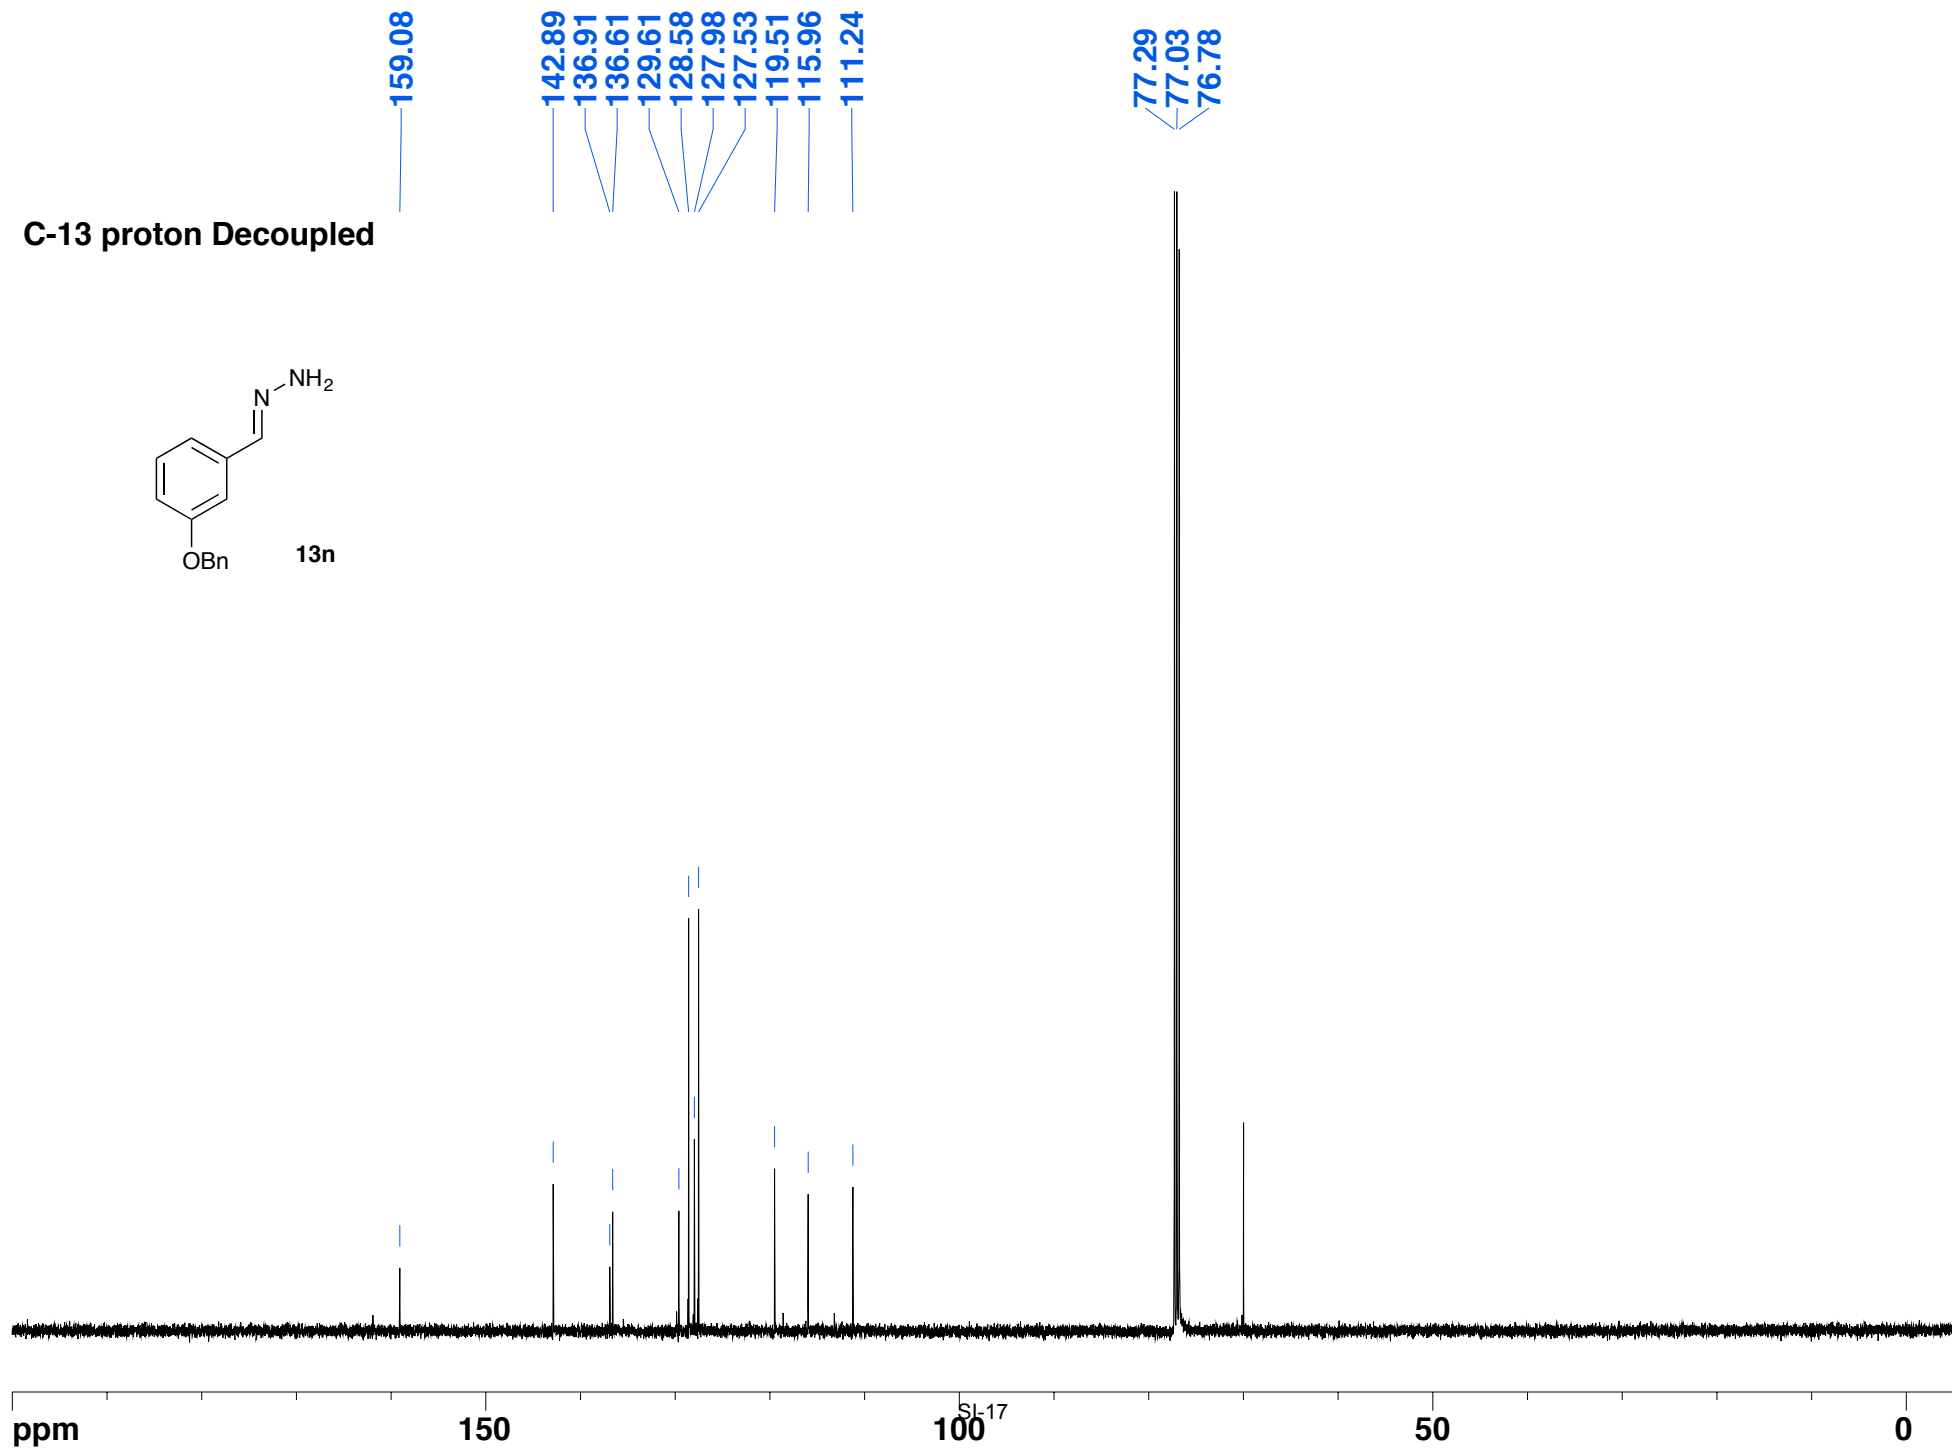

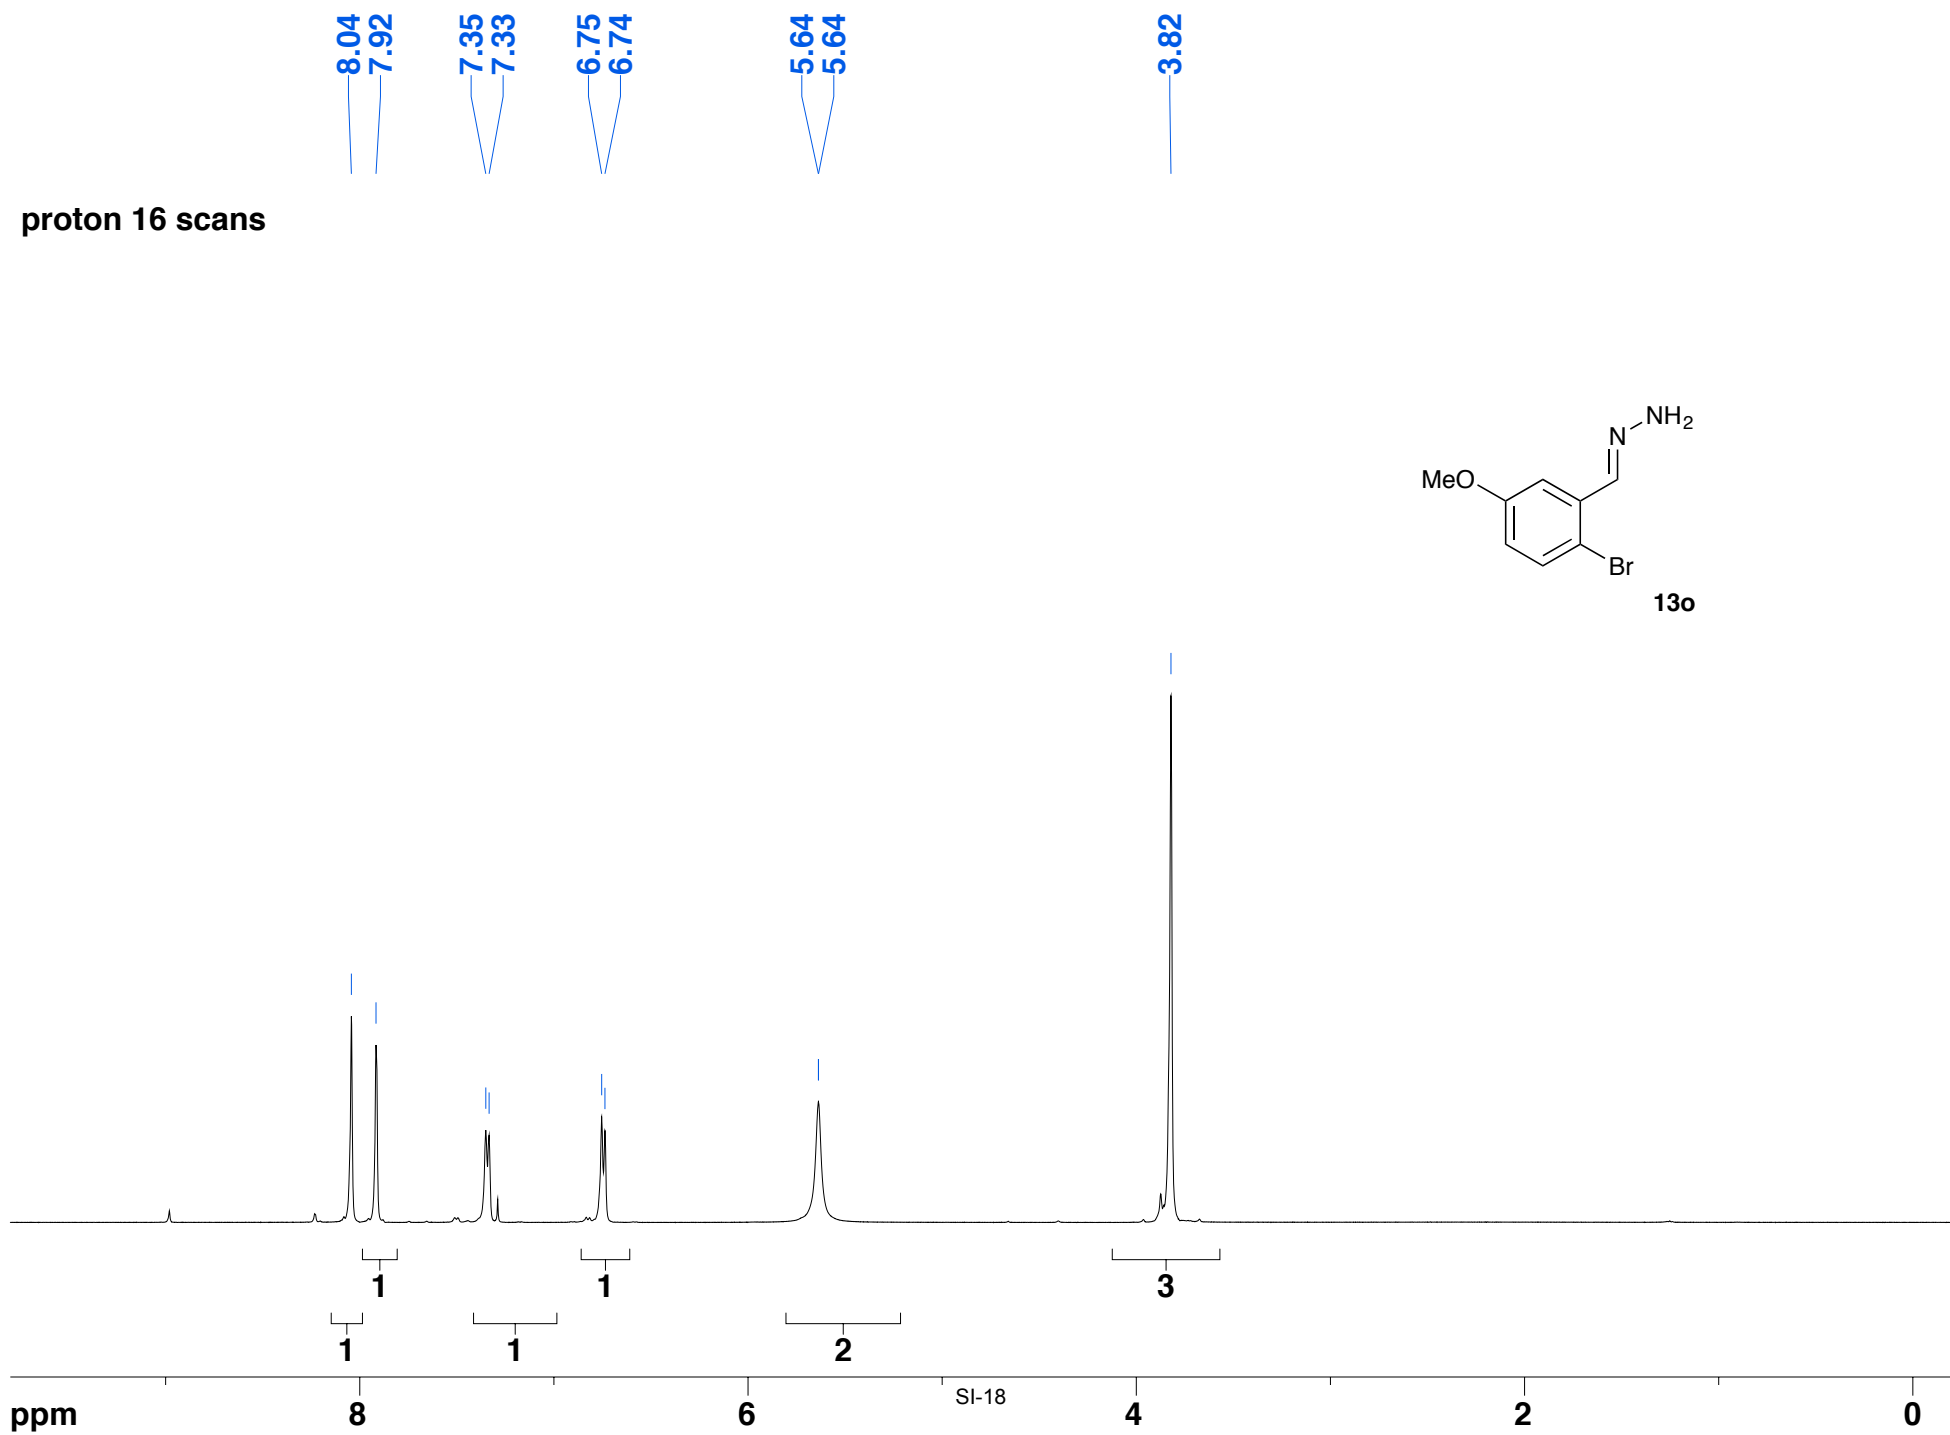

C-13 proton Decoupled

155.81

137.19

131.95

128.29

125.71

113.50

112.70

77.35

77.10

76.84

55.77

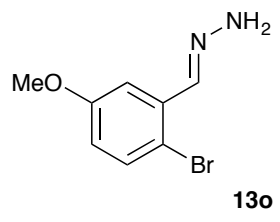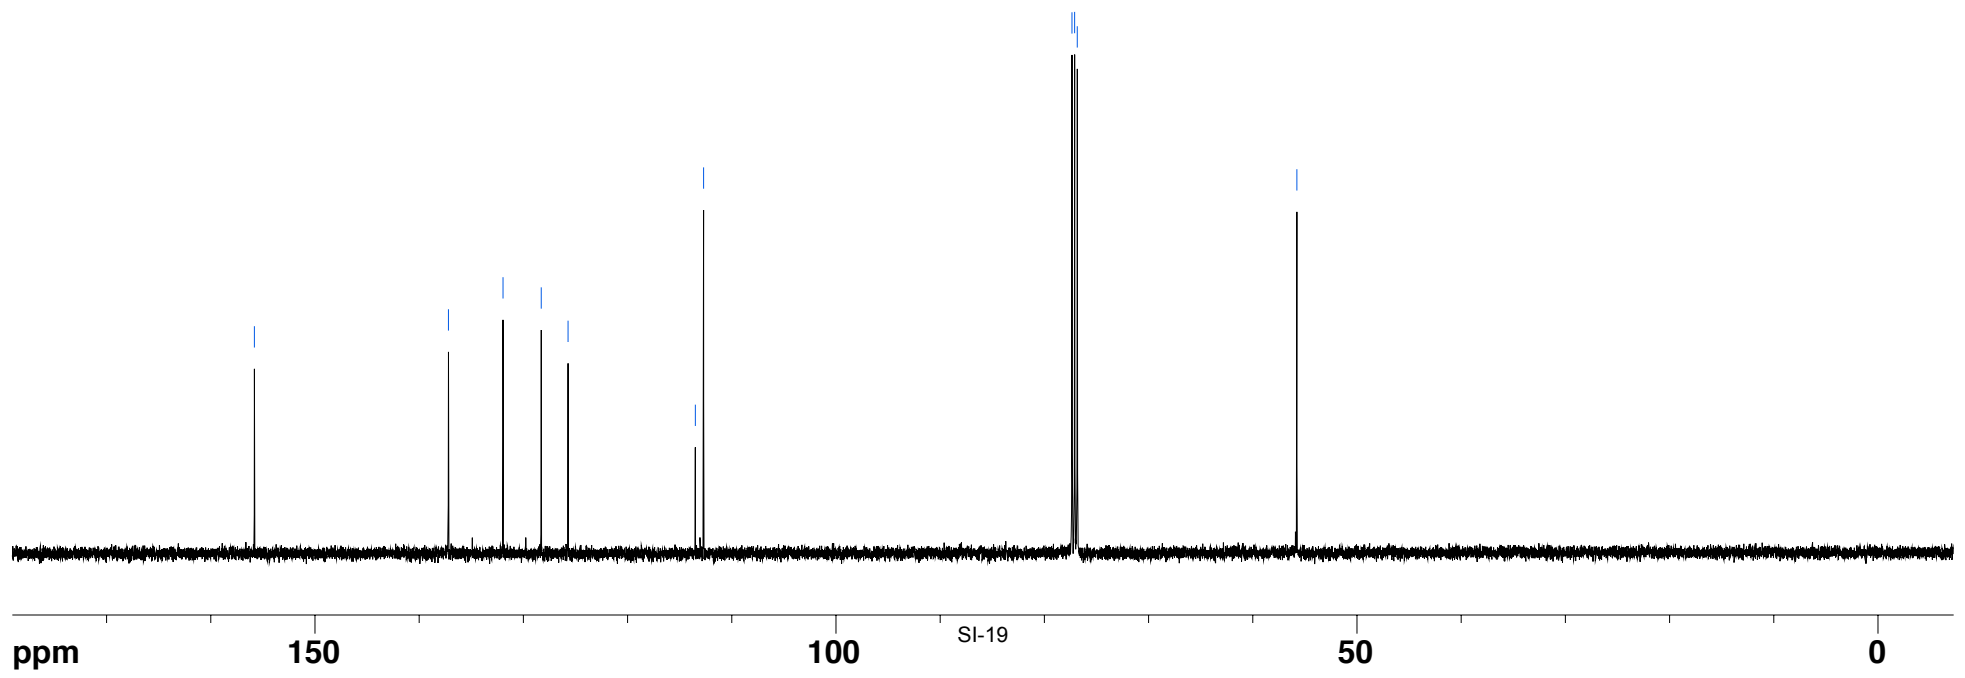

8.26  
8.23  
7.54  
7.51  
7.26  
5.58  
5.43  
1.24

proton, 16 scans

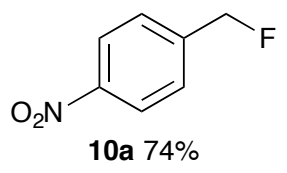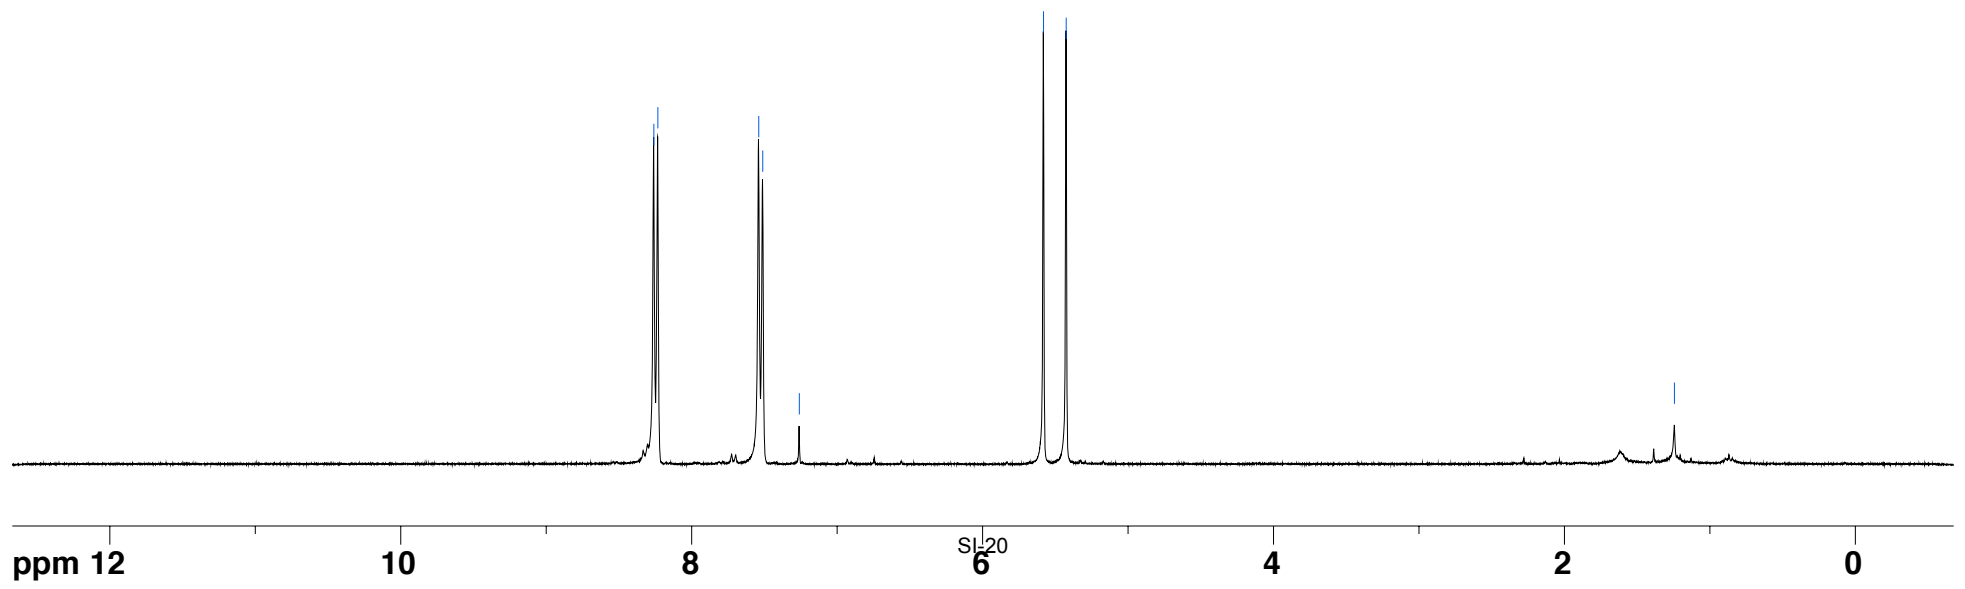

147.92  
143.51  
143.26

127.06  
126.98  
123.81

83.99  
81.73  
77.45  
77.02  
76.60

C-13 with Decoupling AVANCE-300B

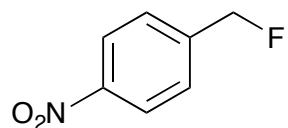

10a 74%

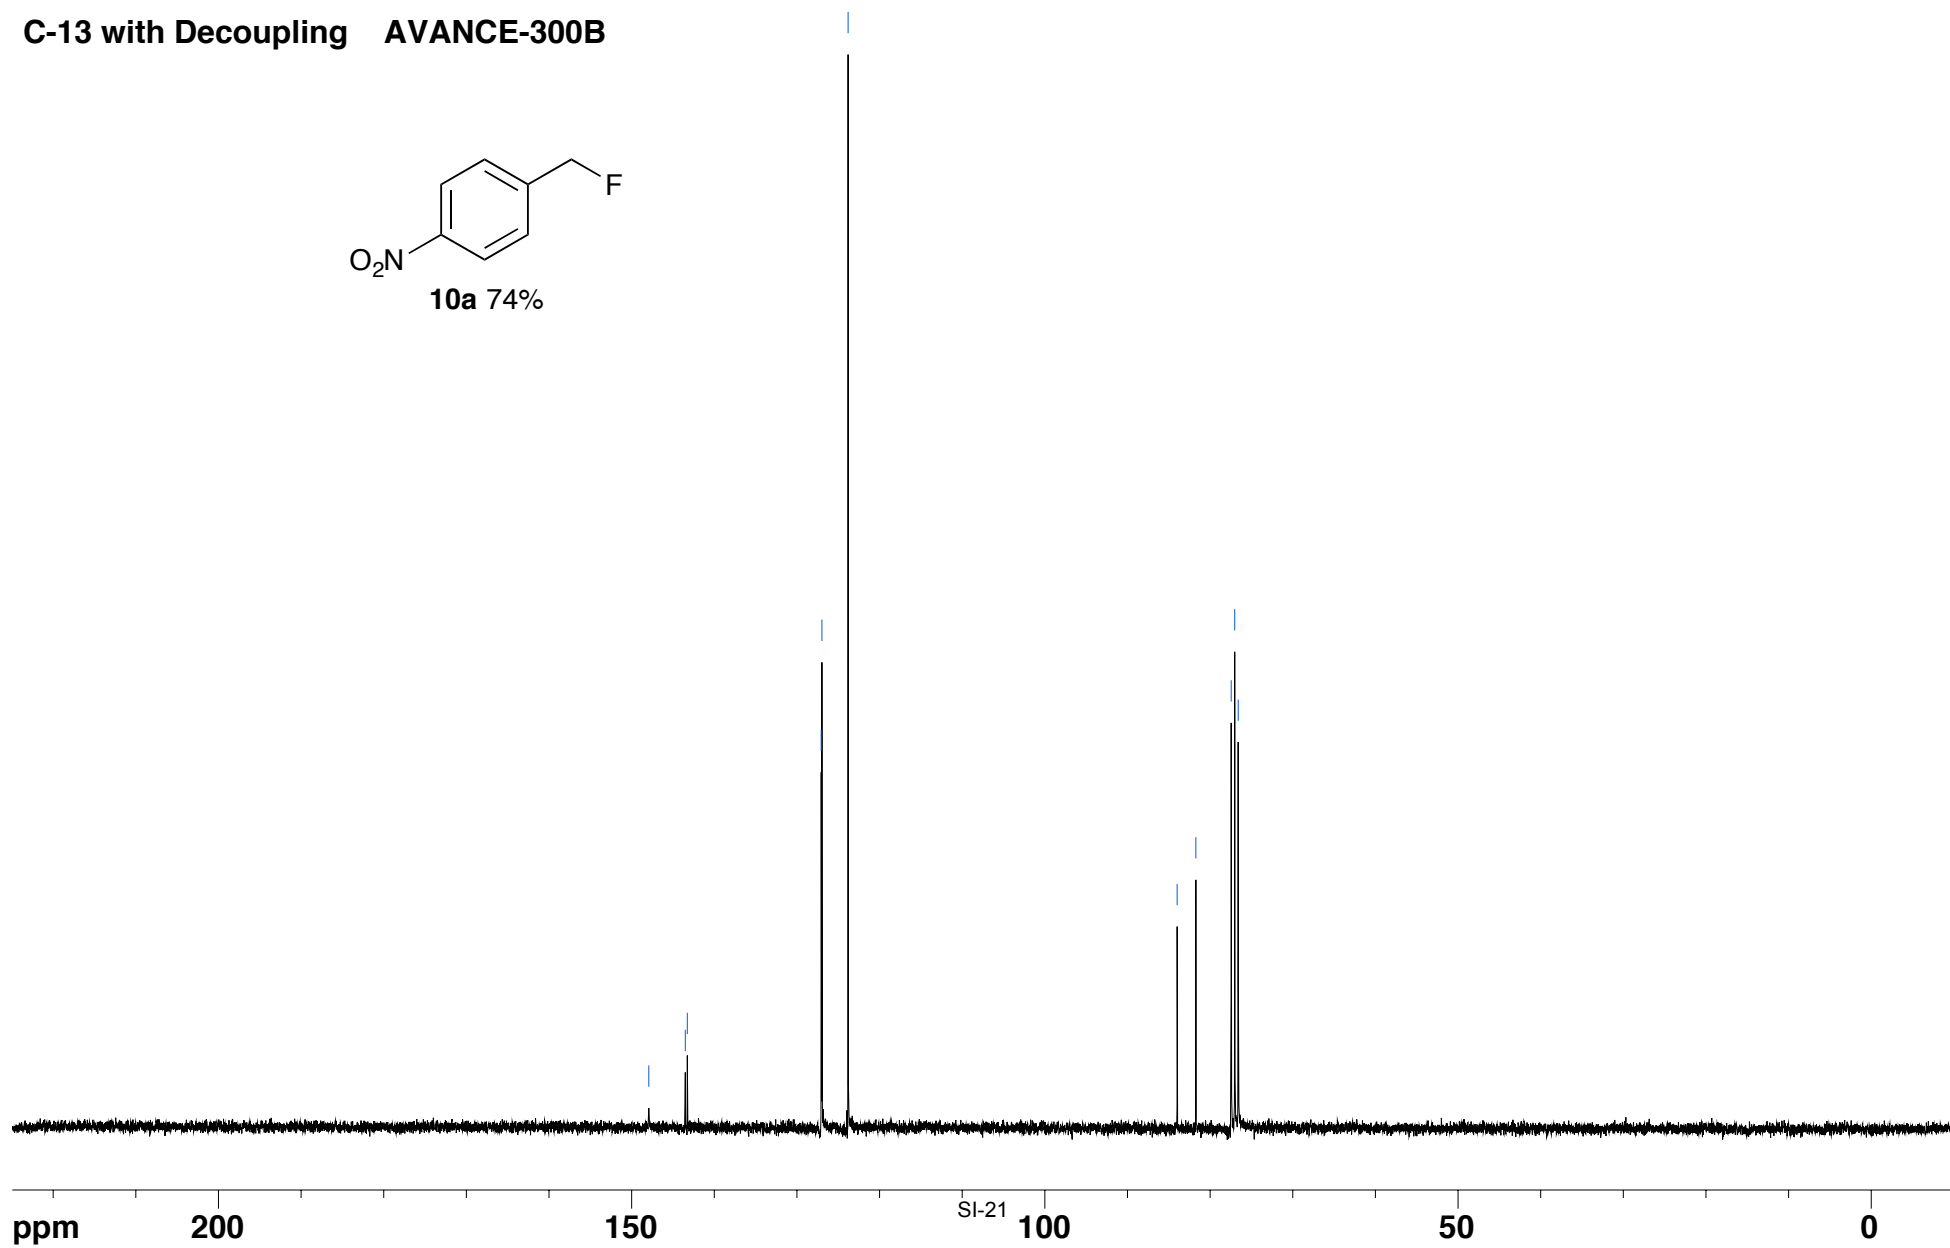

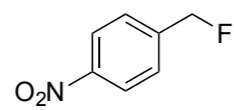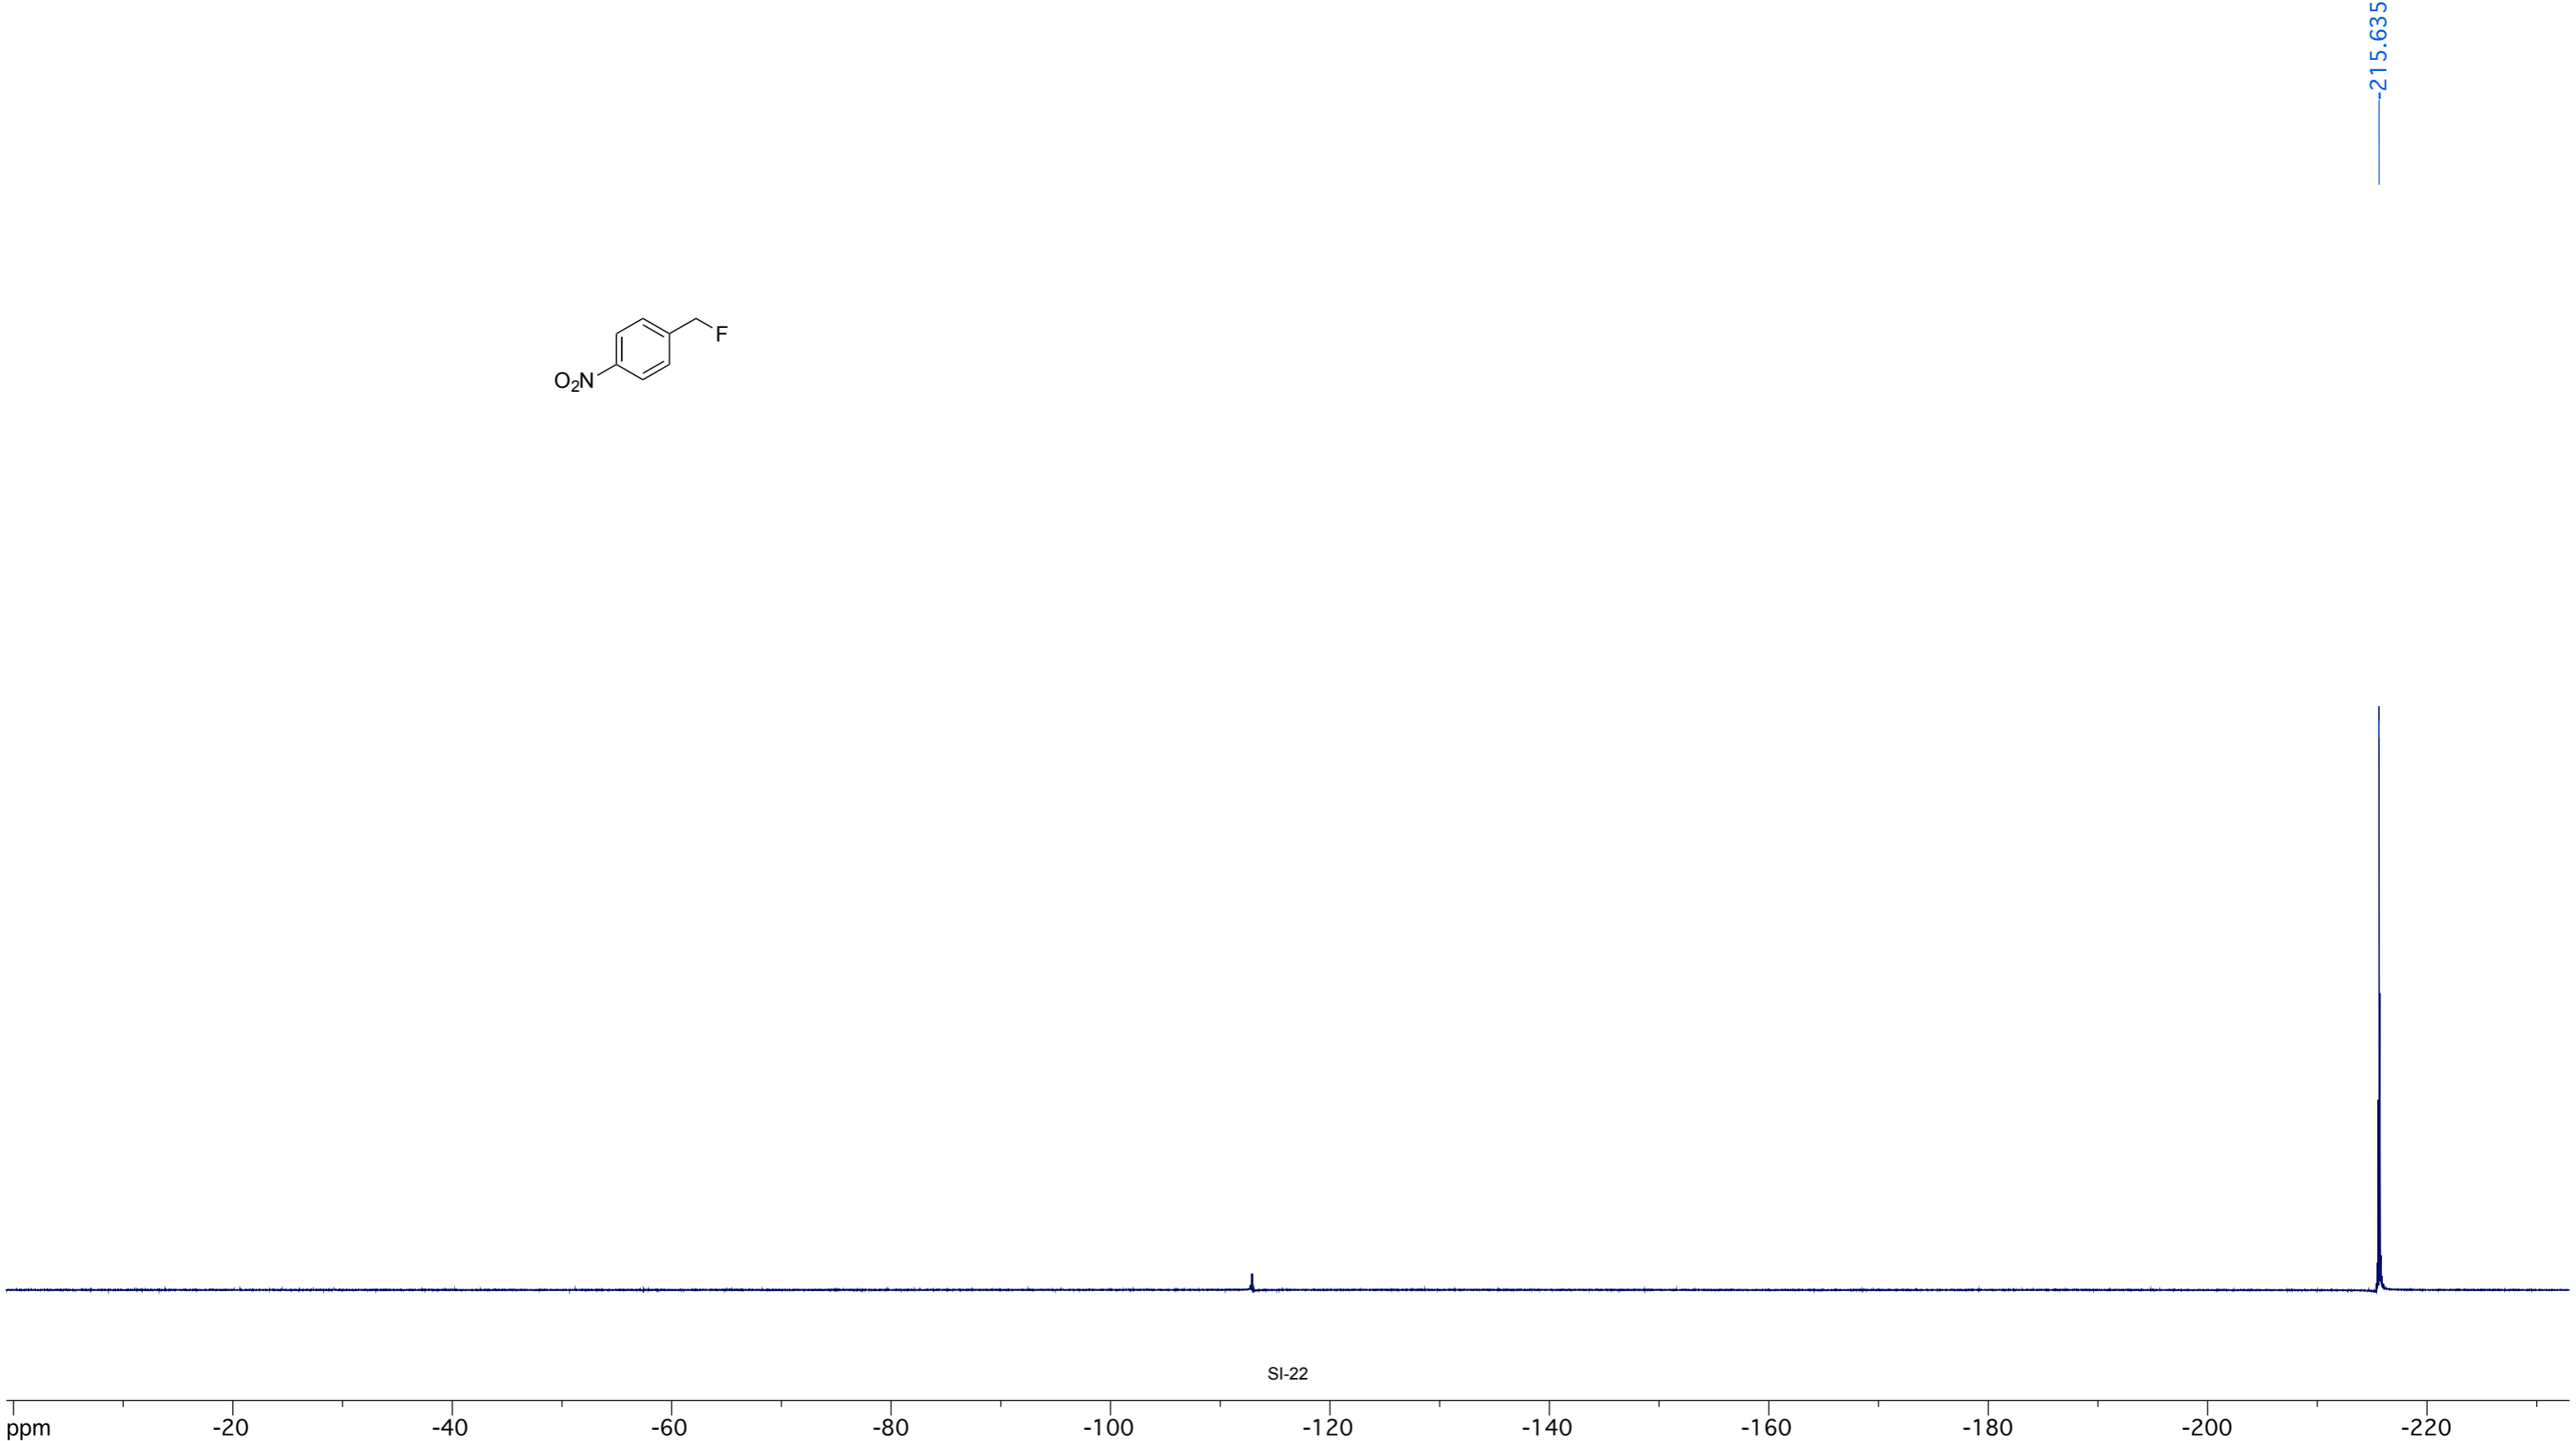

SI-22

8.25  
8.22  
7.72  
7.70  
7.62  
7.60  
7.57  
7.26

5.57  
5.42

proton, 16 scans

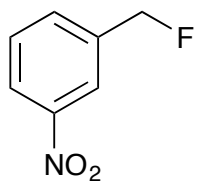

**10b** 71%

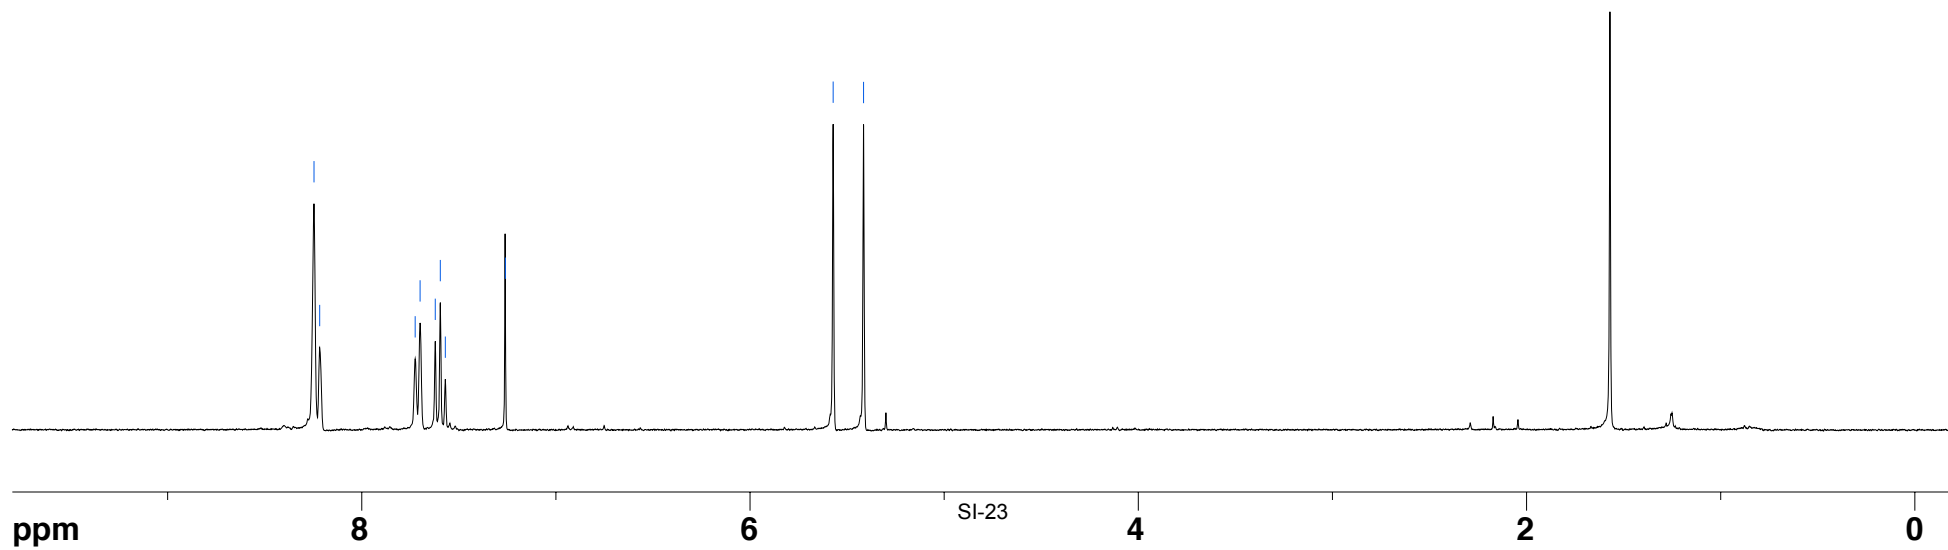

C-13 proton Decoupled

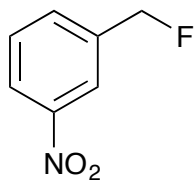

10b 71%

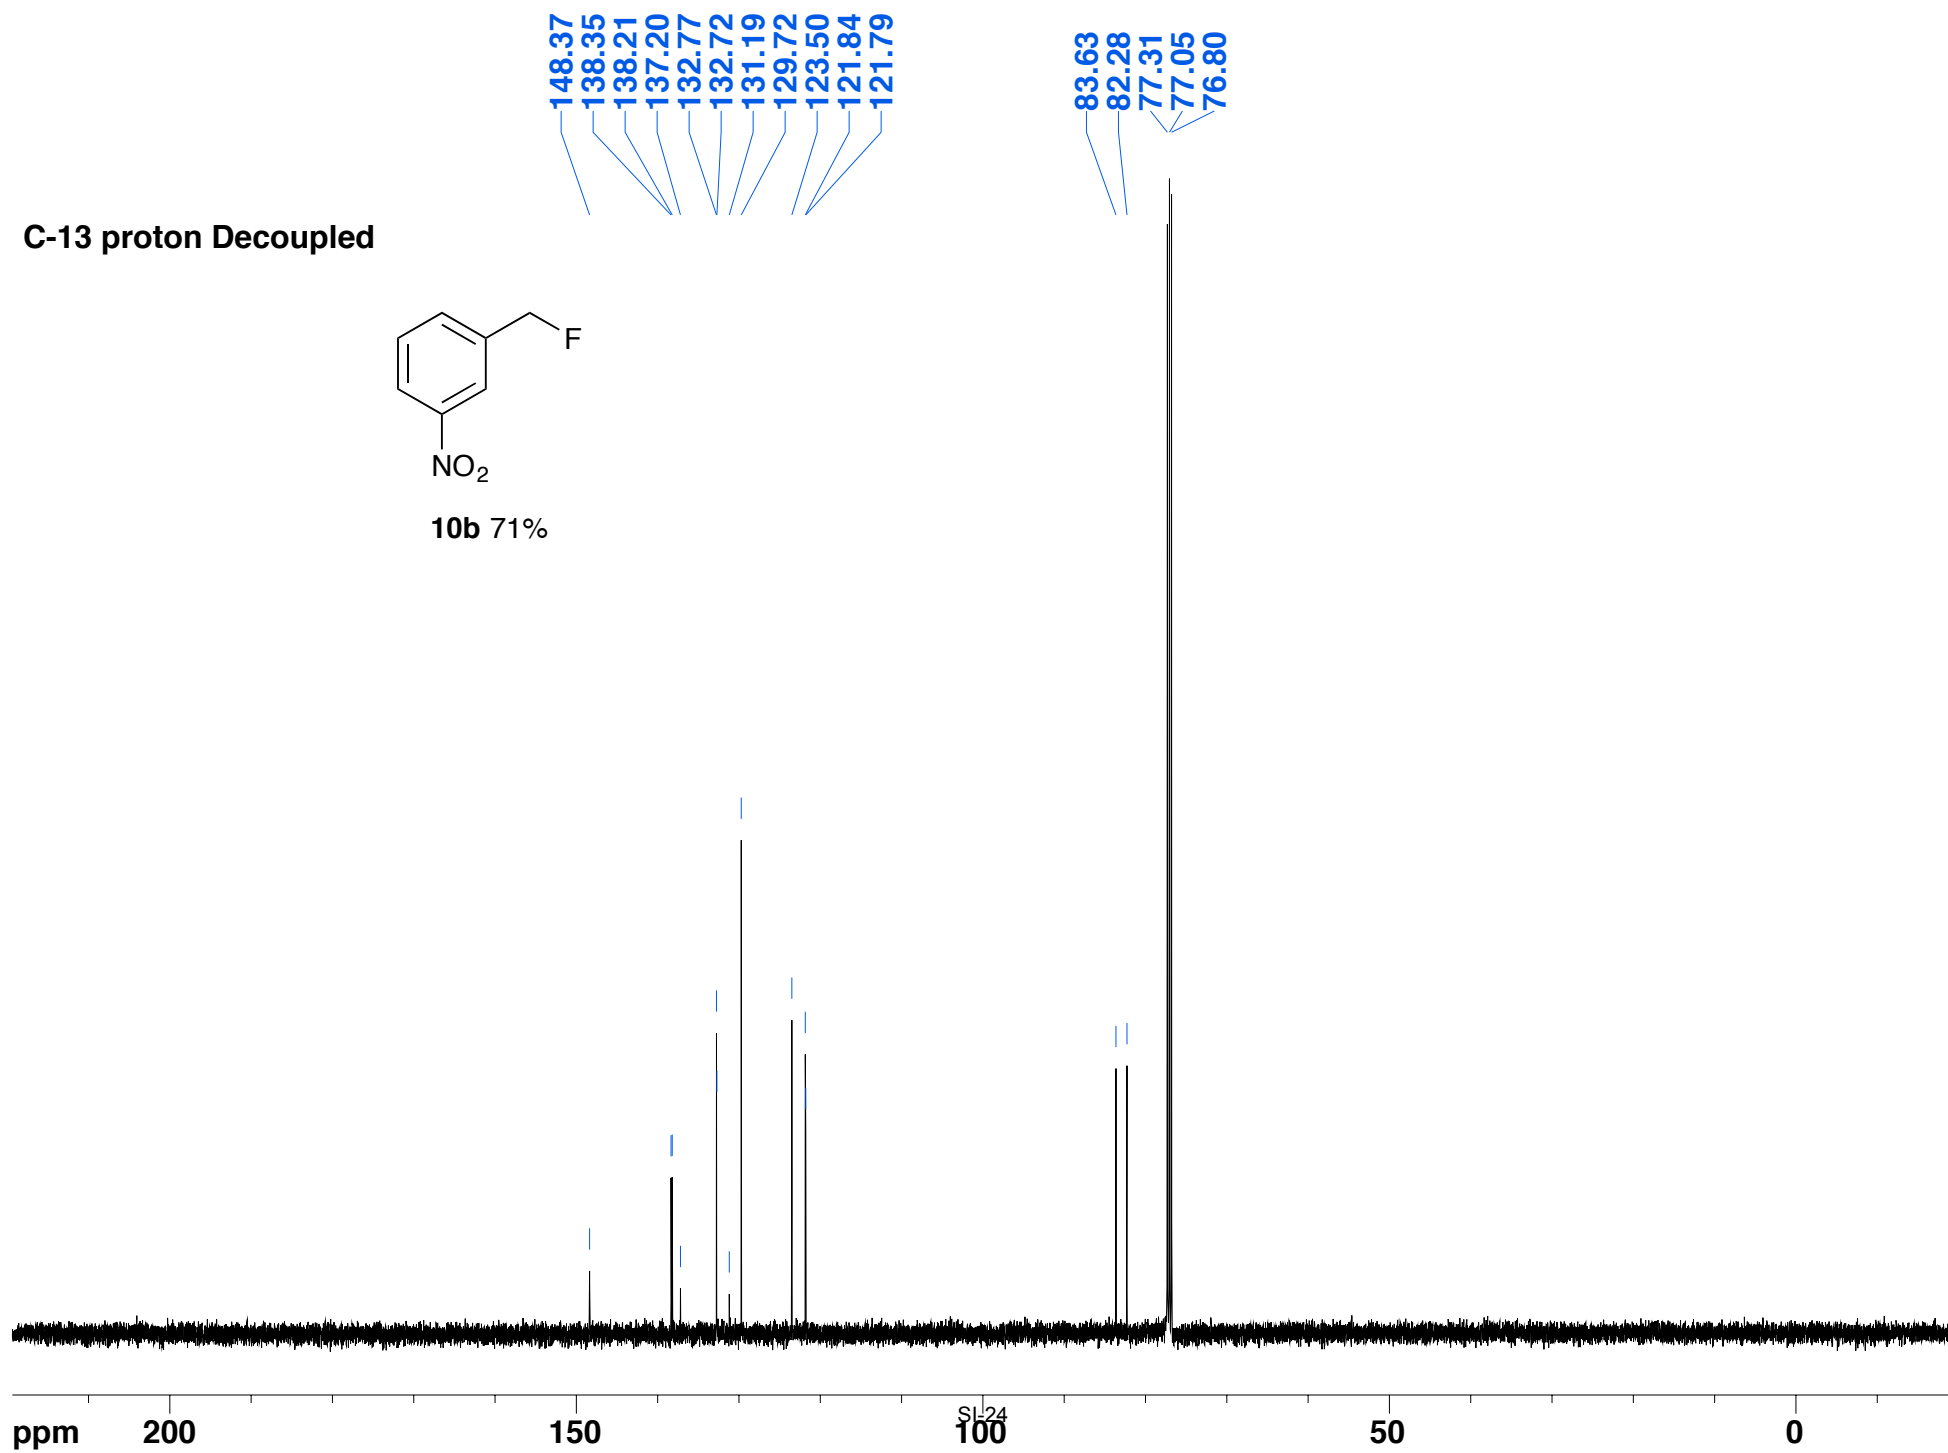



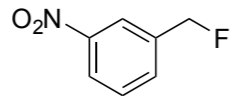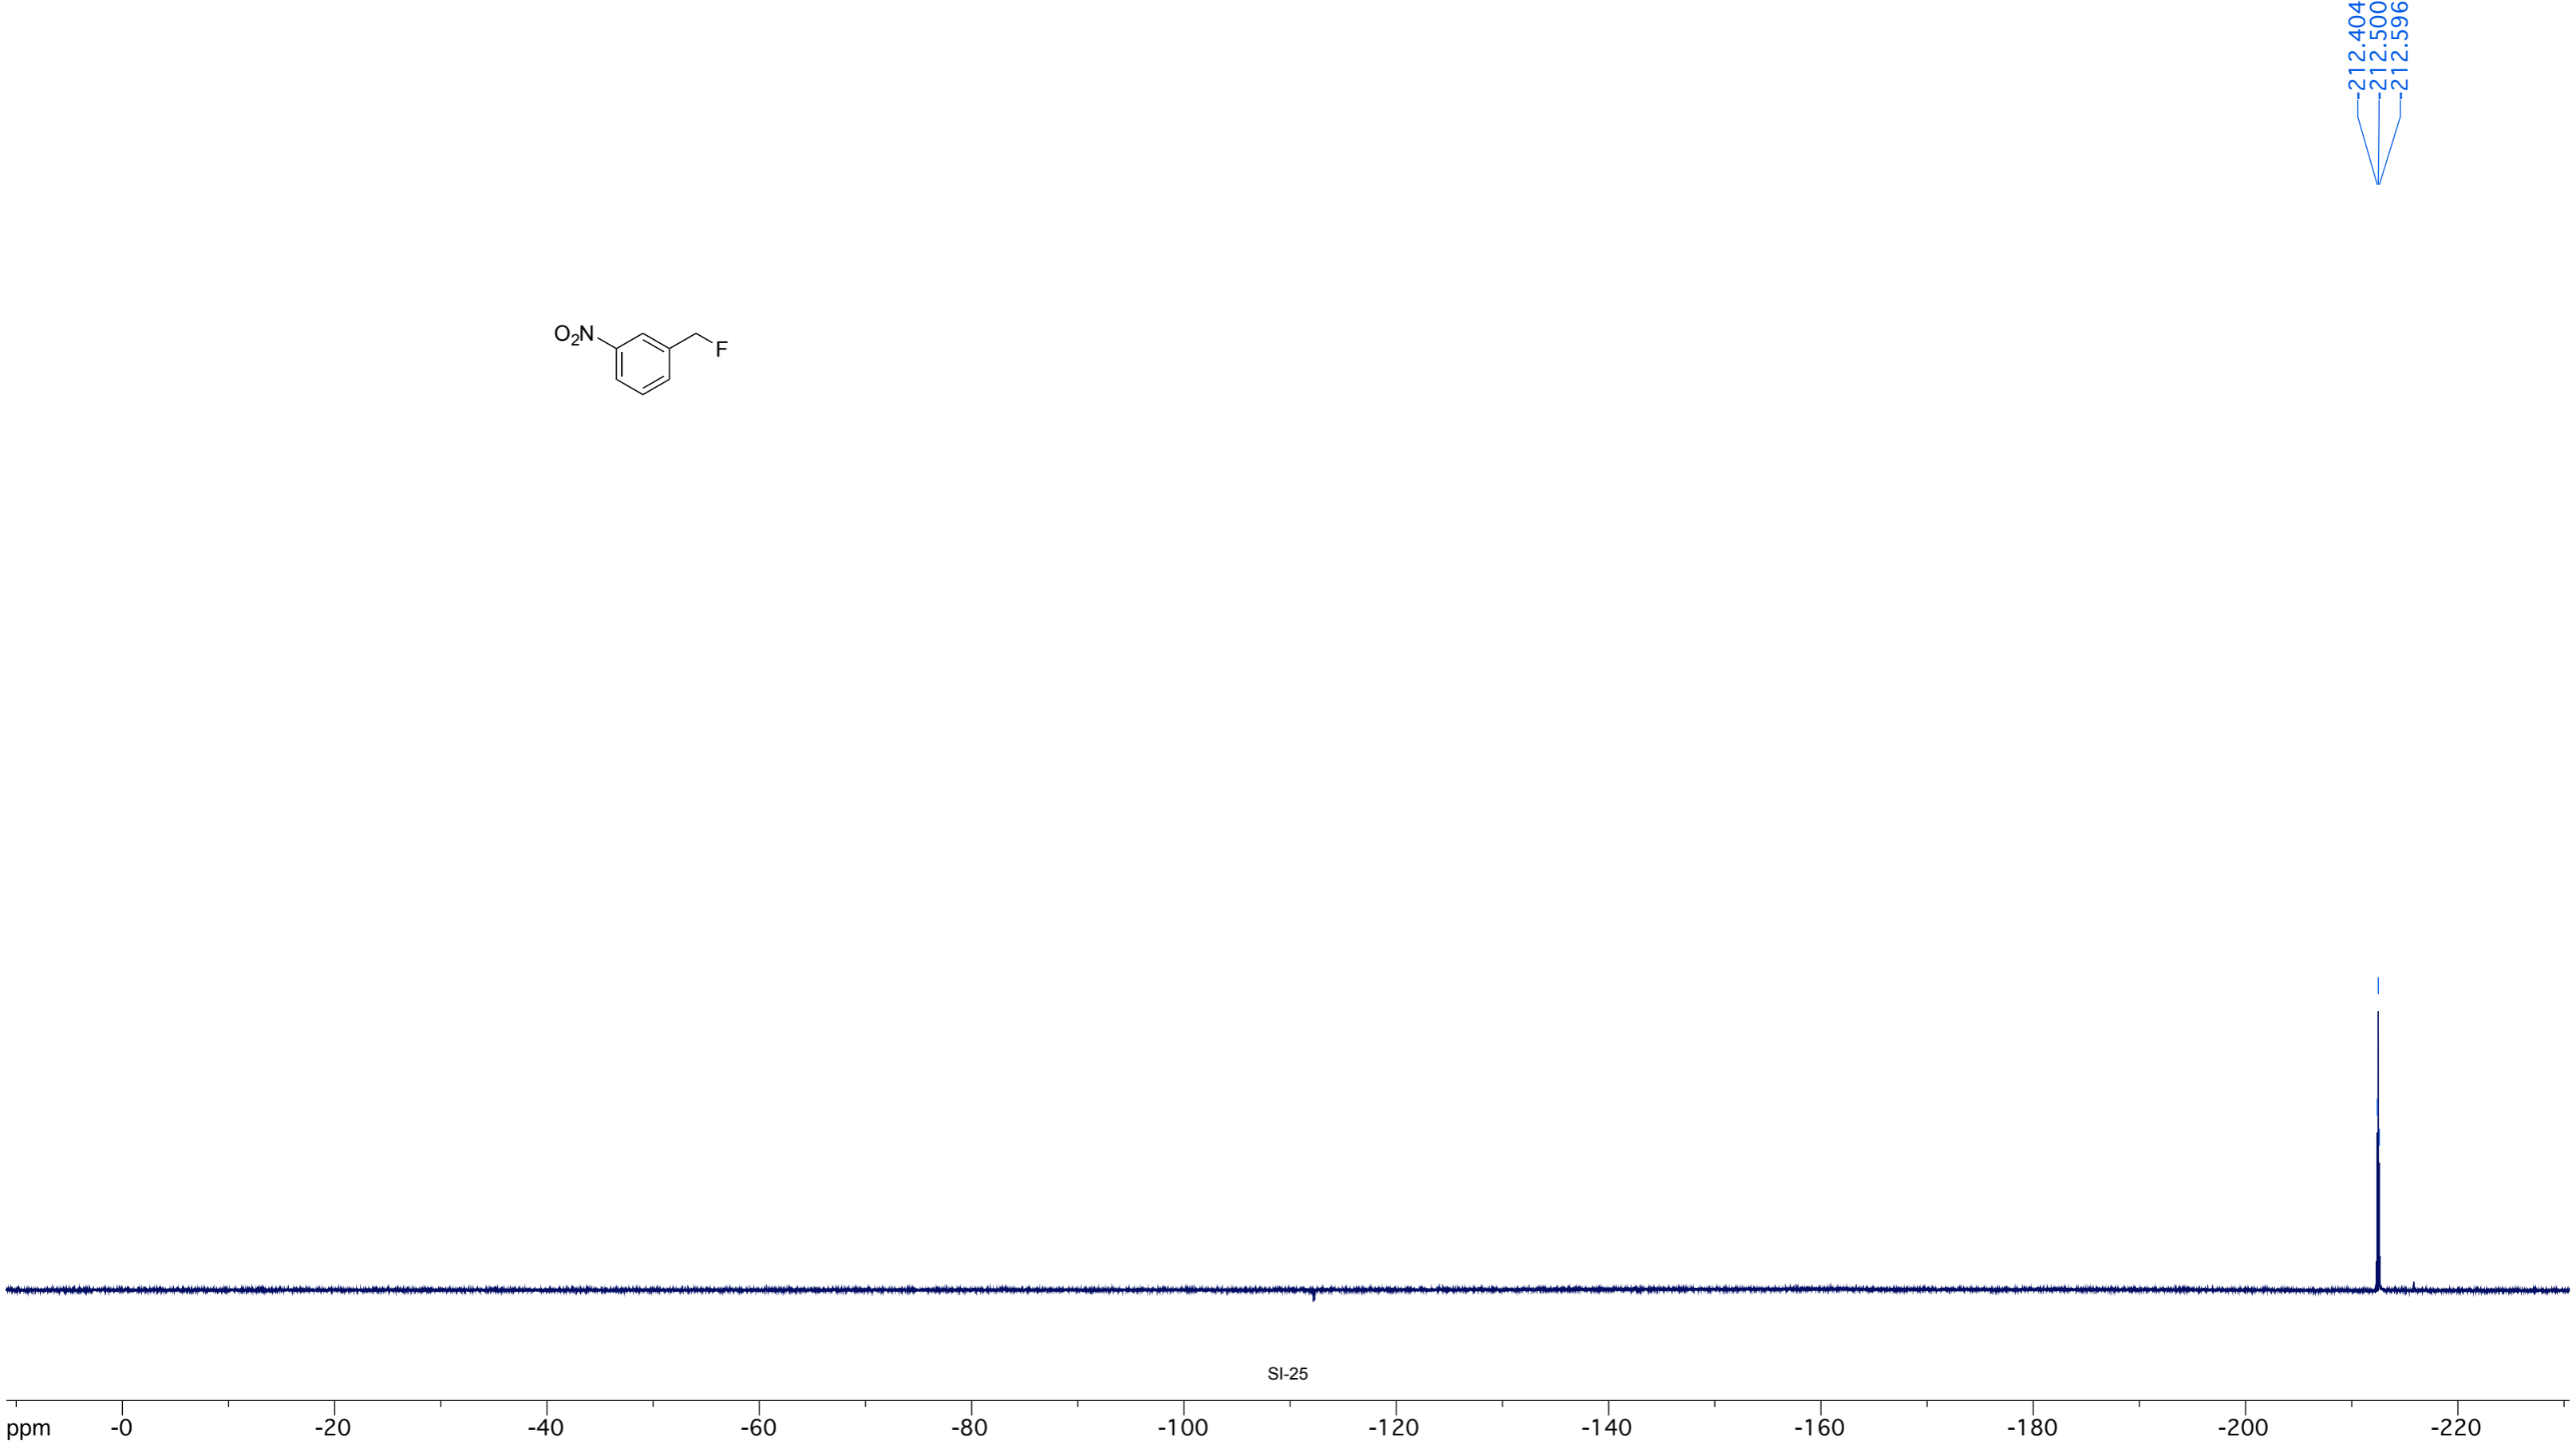

8.26  
8.23  
7.85  
7.83  
7.80  
7.77  
7.75  
7.57  
7.55  
7.52

5.98  
5.82

proton 16 scans AVANCE 300B

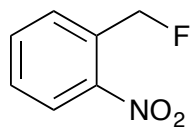

10c 64%

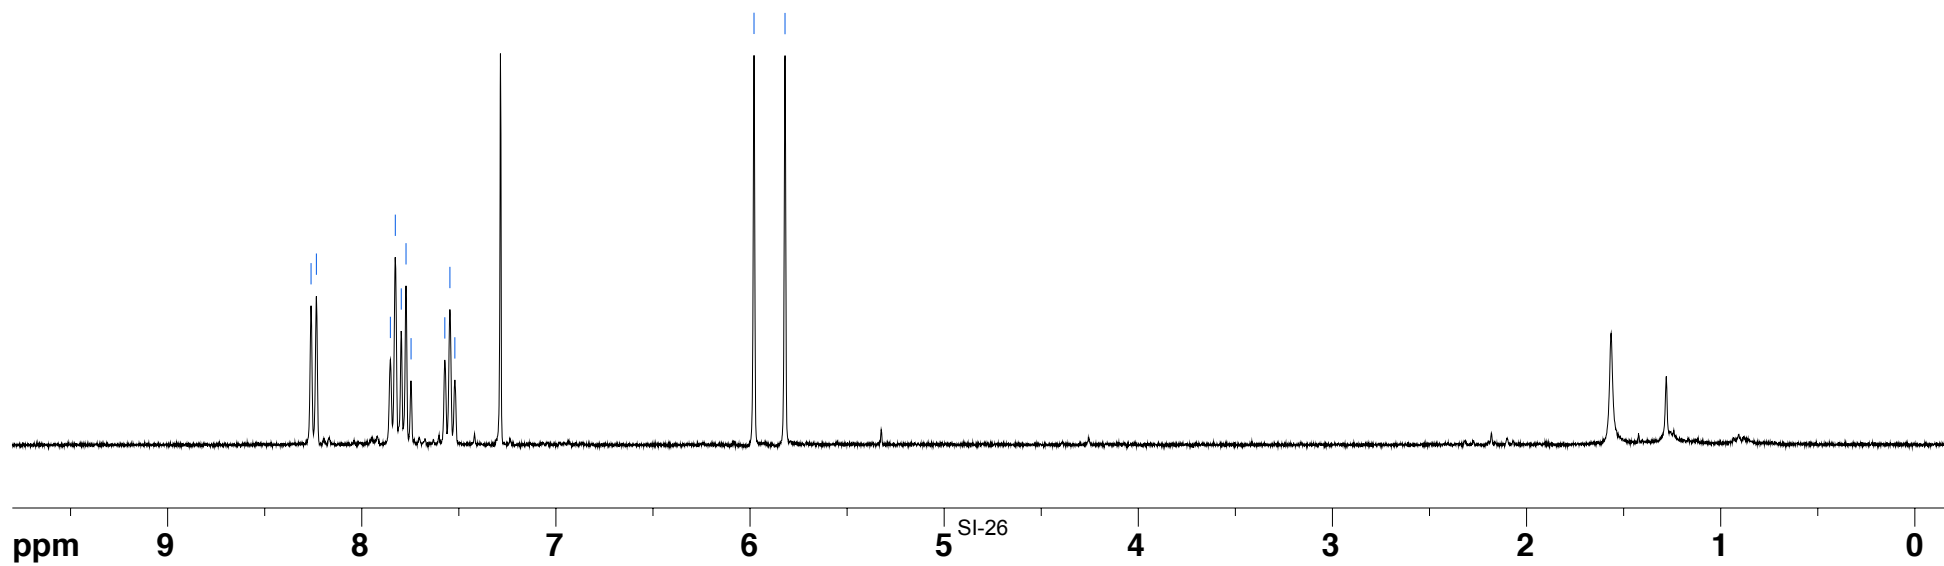

C-13 proton Decoupled

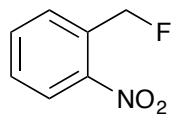

10c 64%

145.60  
134.40  
128.54  
126.89  
126.75  
124.88  
81.96  
77.28  
77.02  
76.77

ppm 200 150 100 50 0

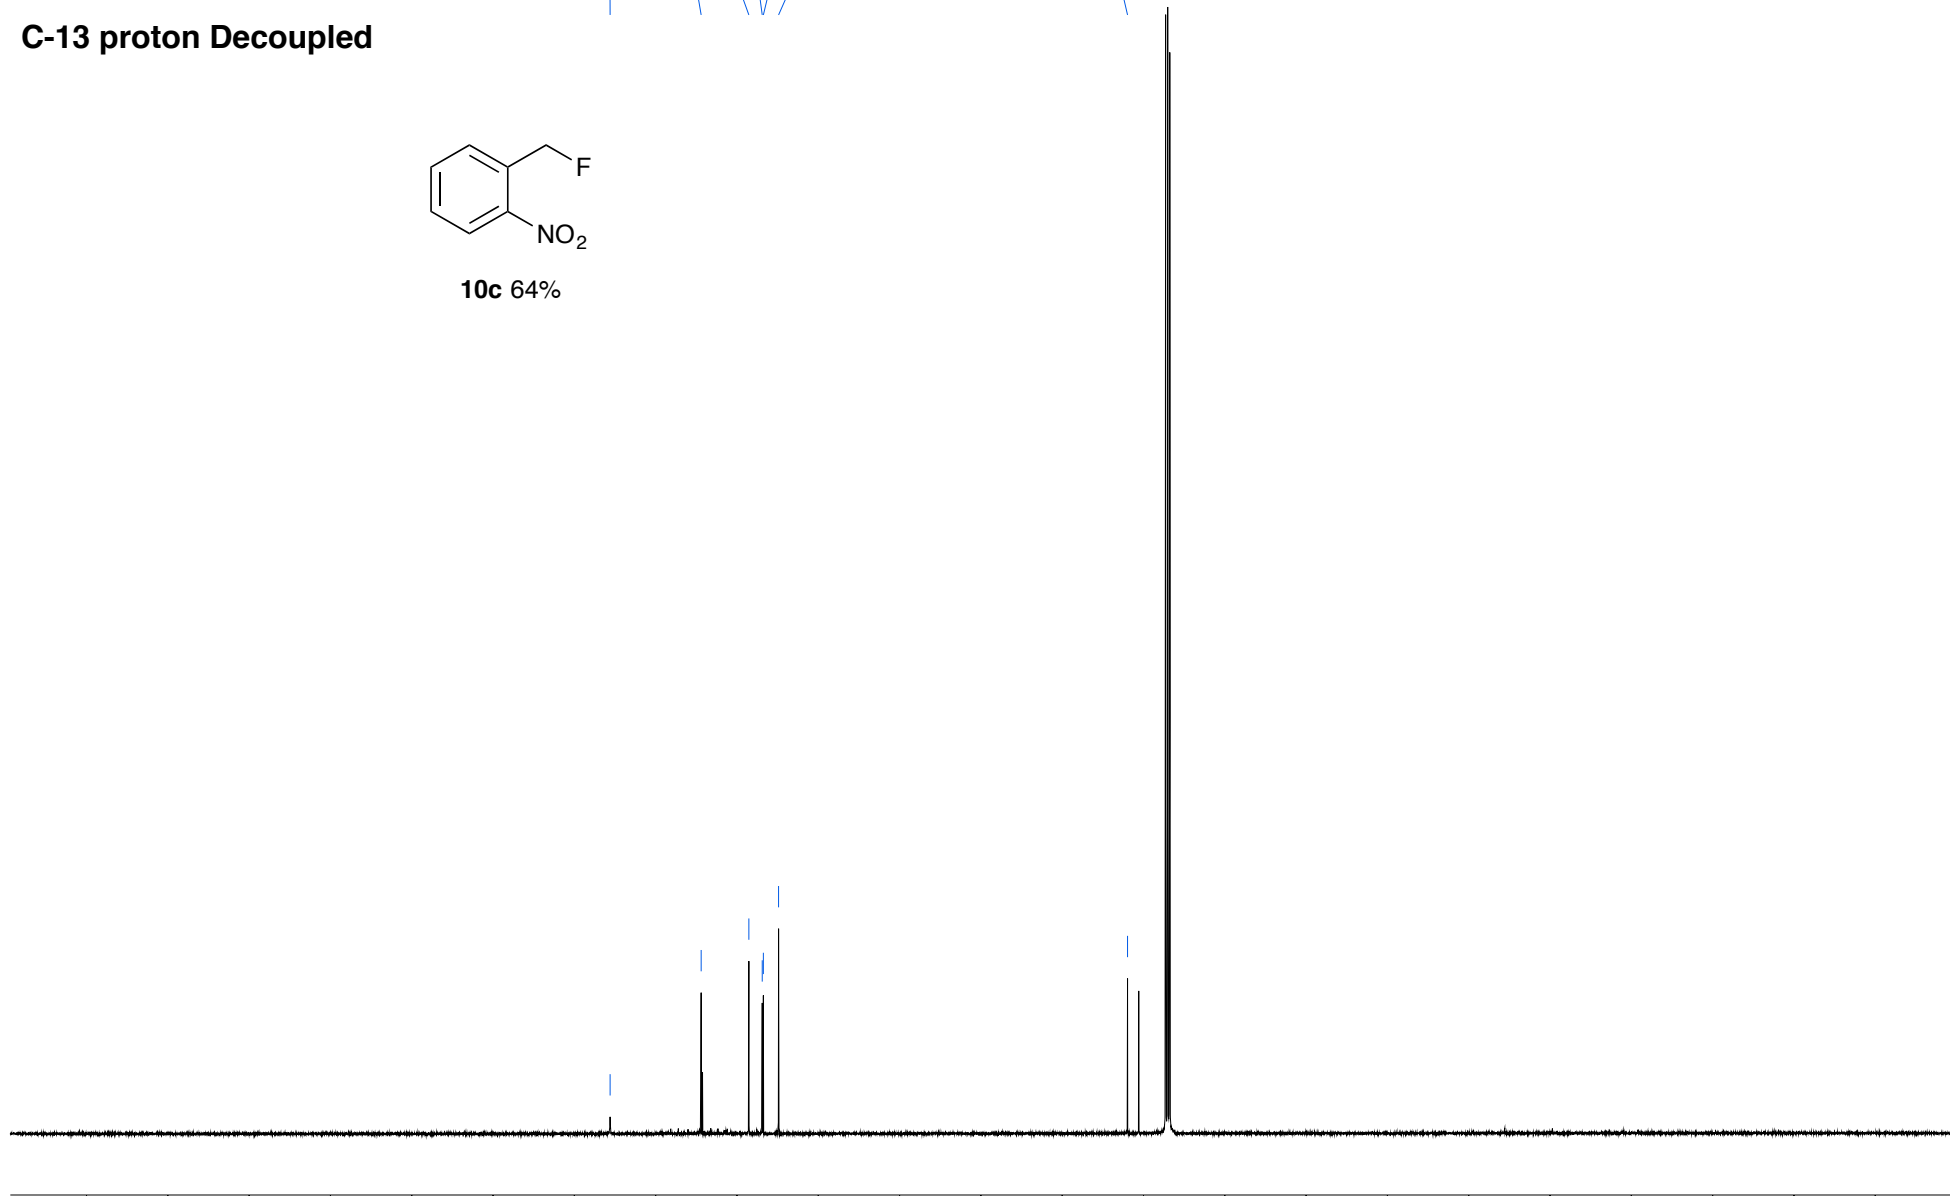

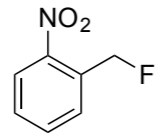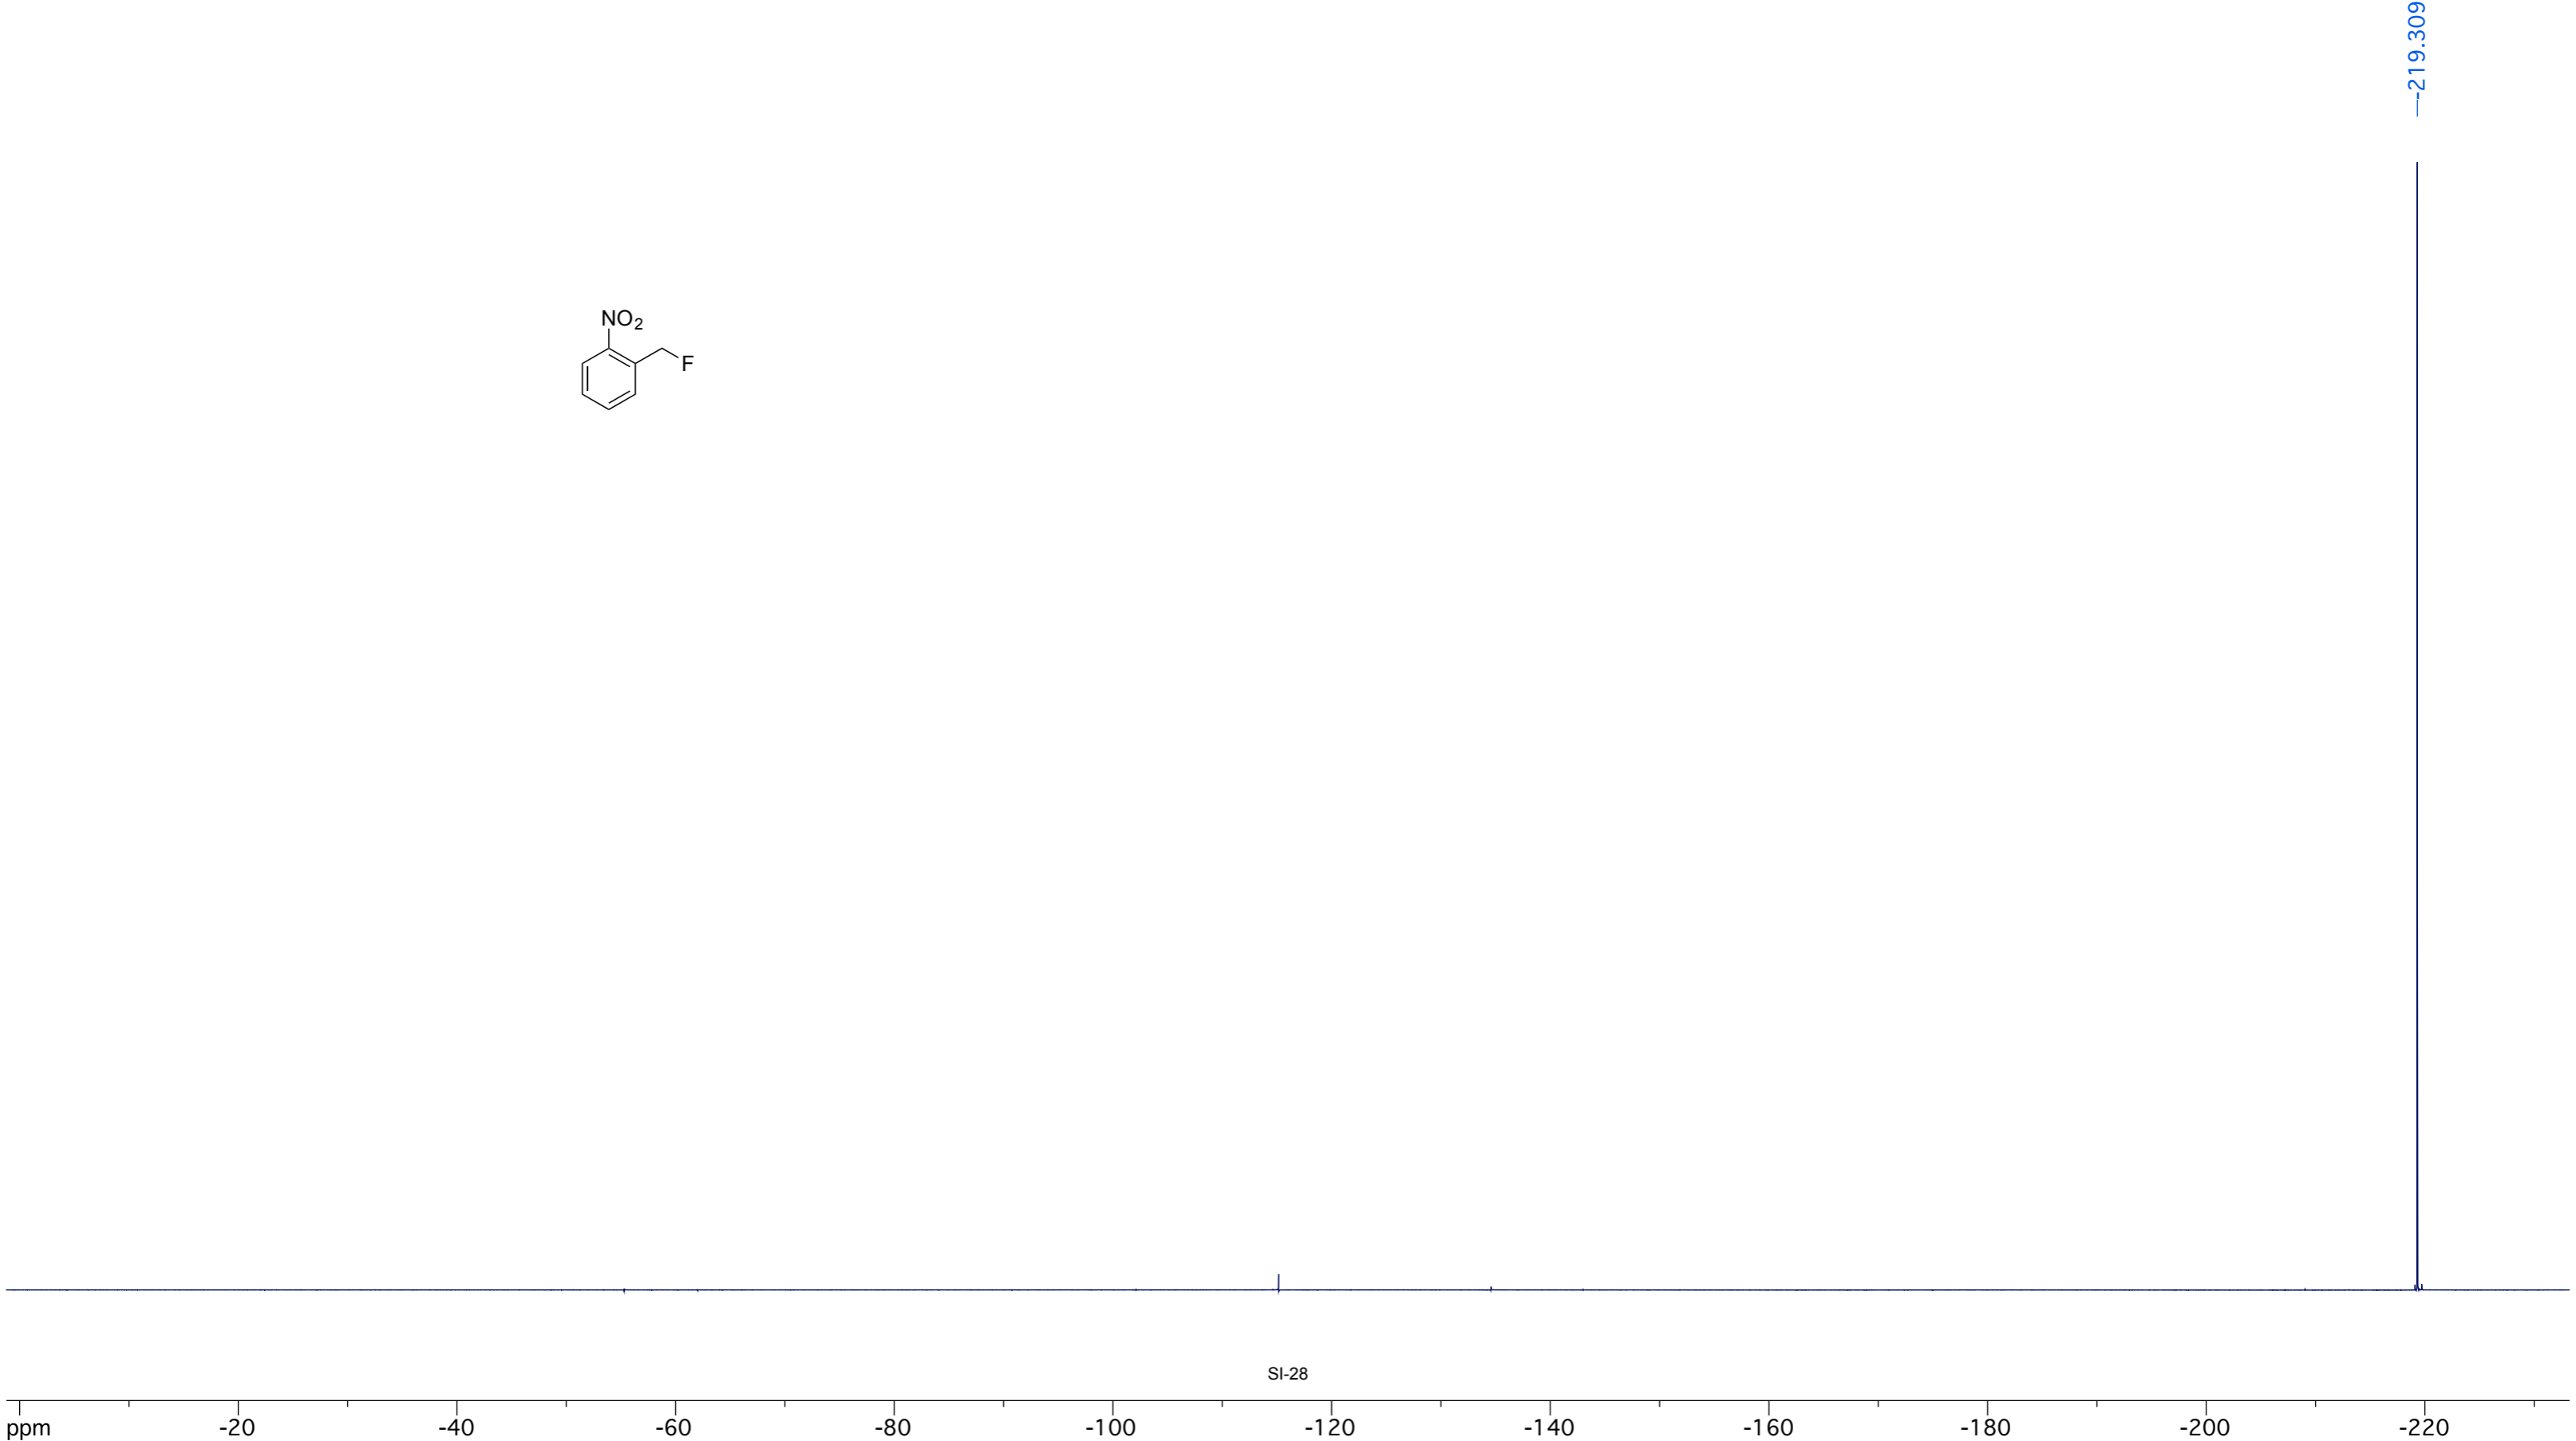

SI-28

7.98  
7.52  
7.50  
7.39  
7.36  
5.49  
5.33  
2.61

proton, 16 scans

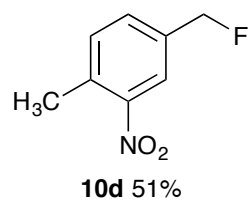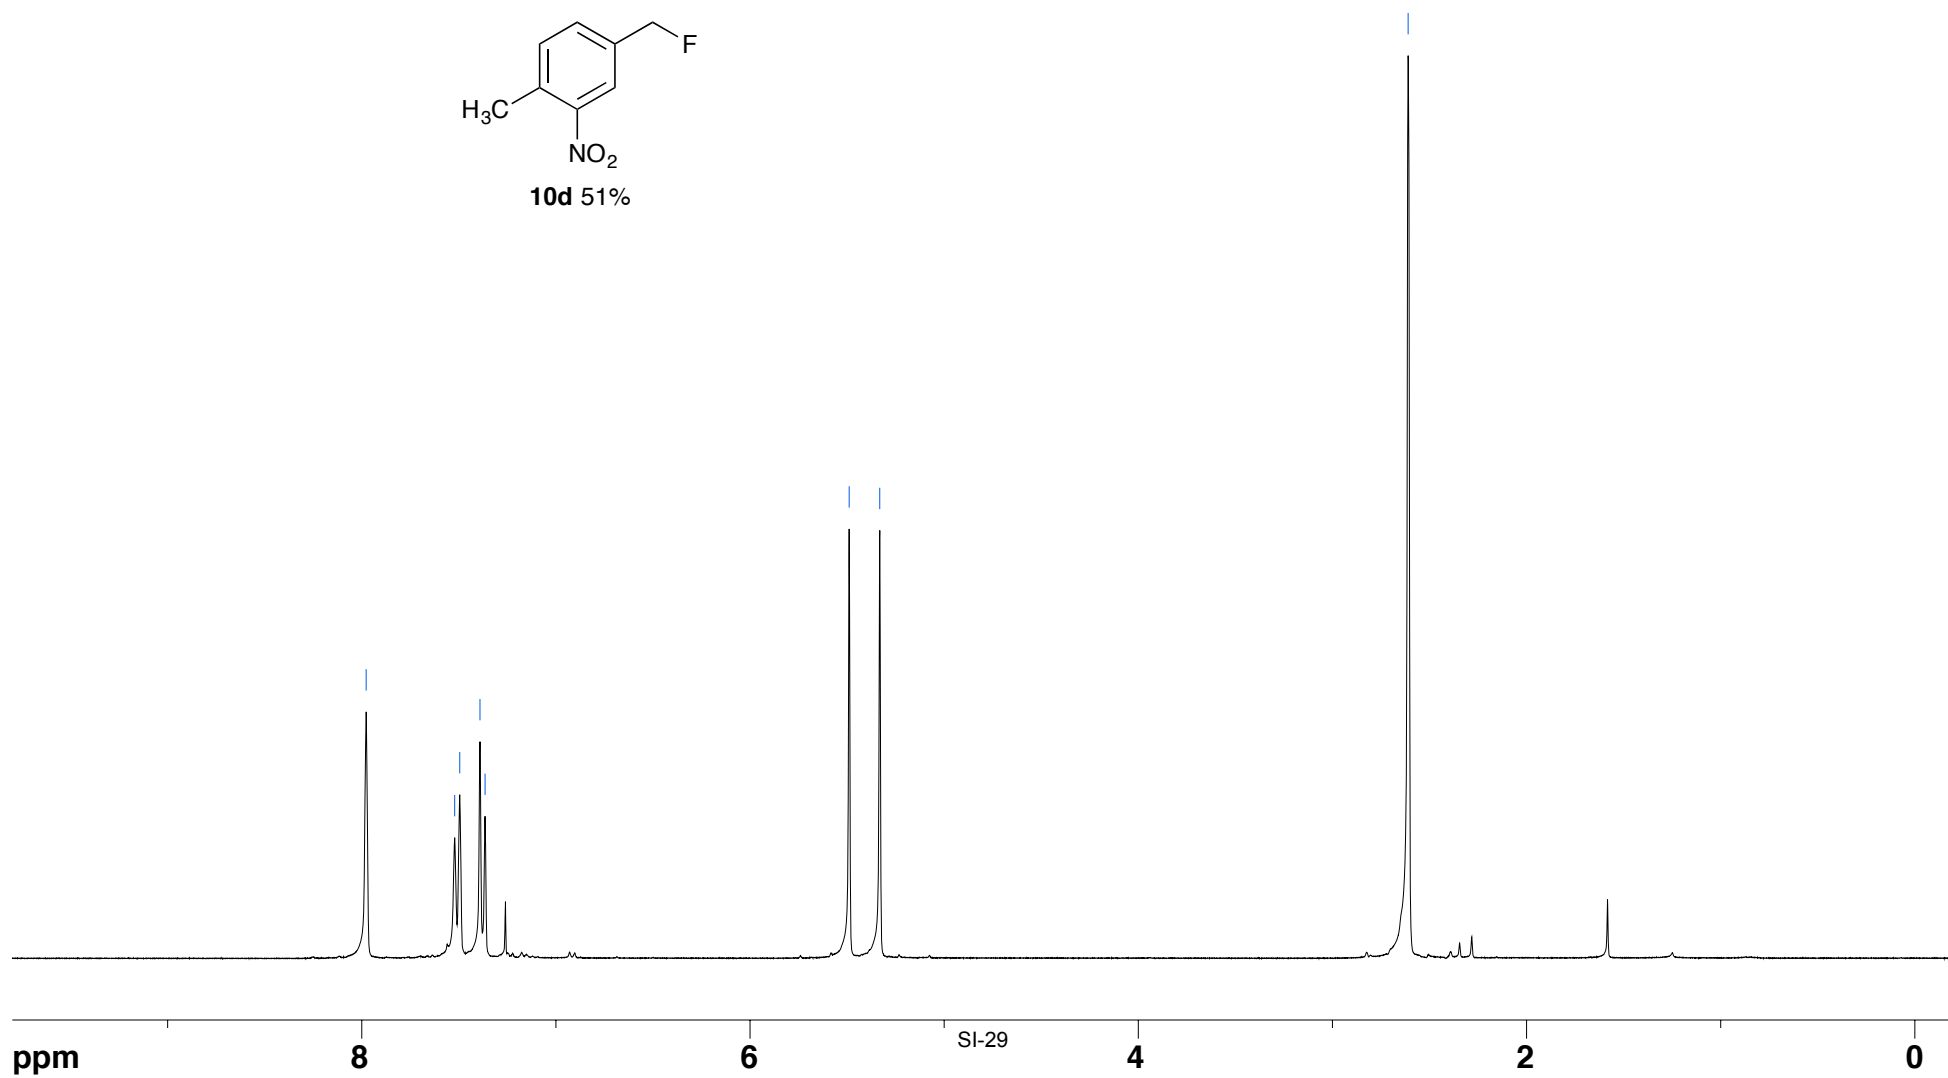

C-13 proton Decoupled

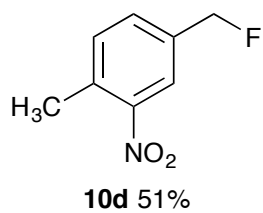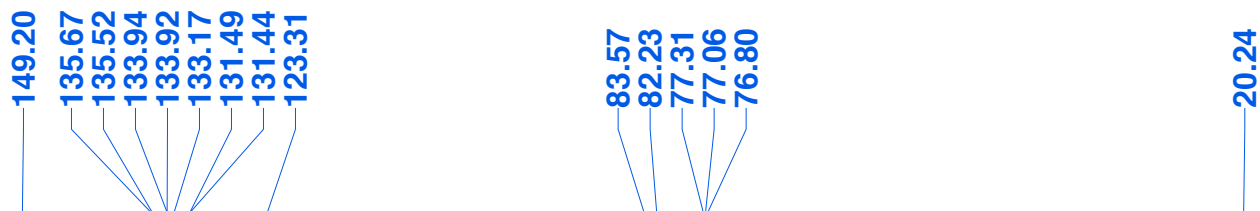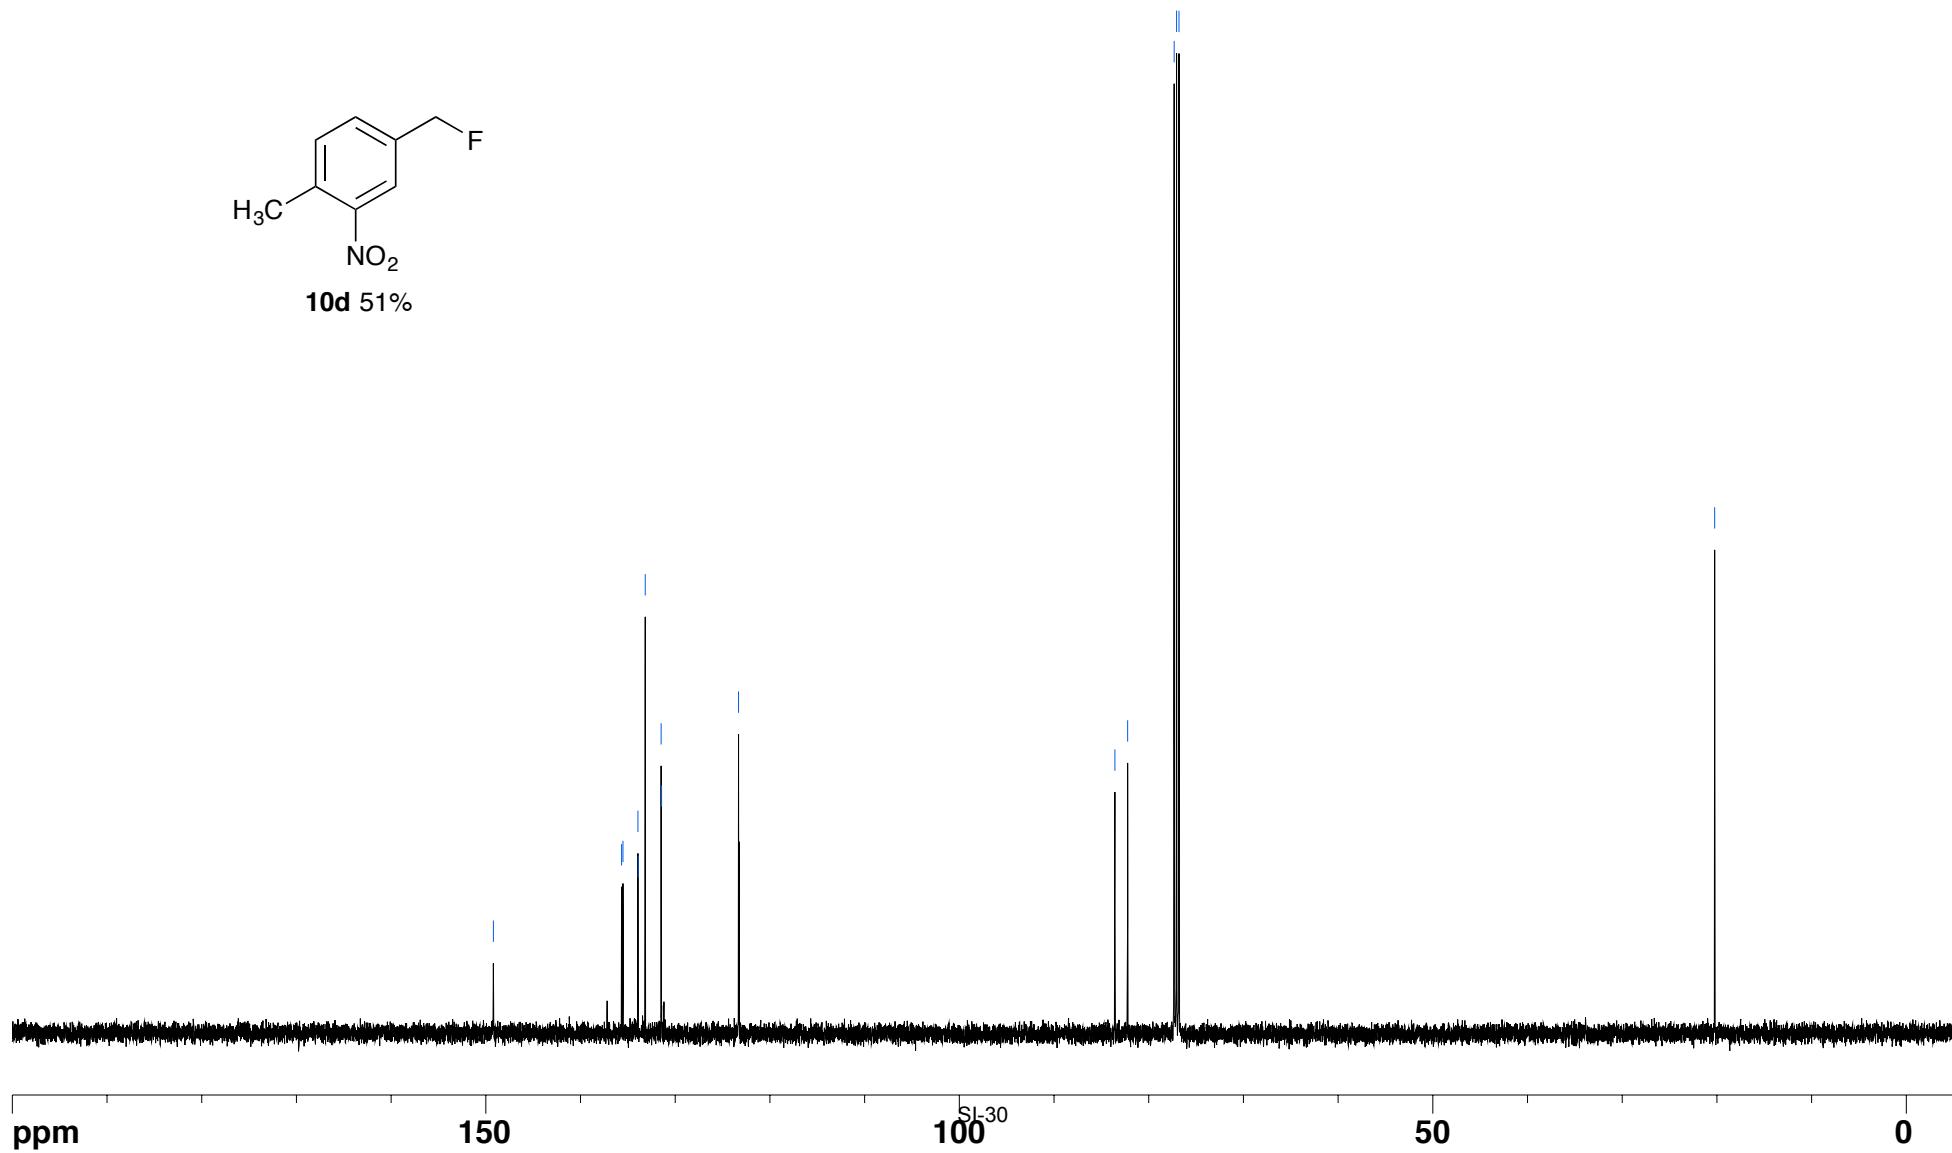

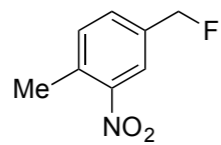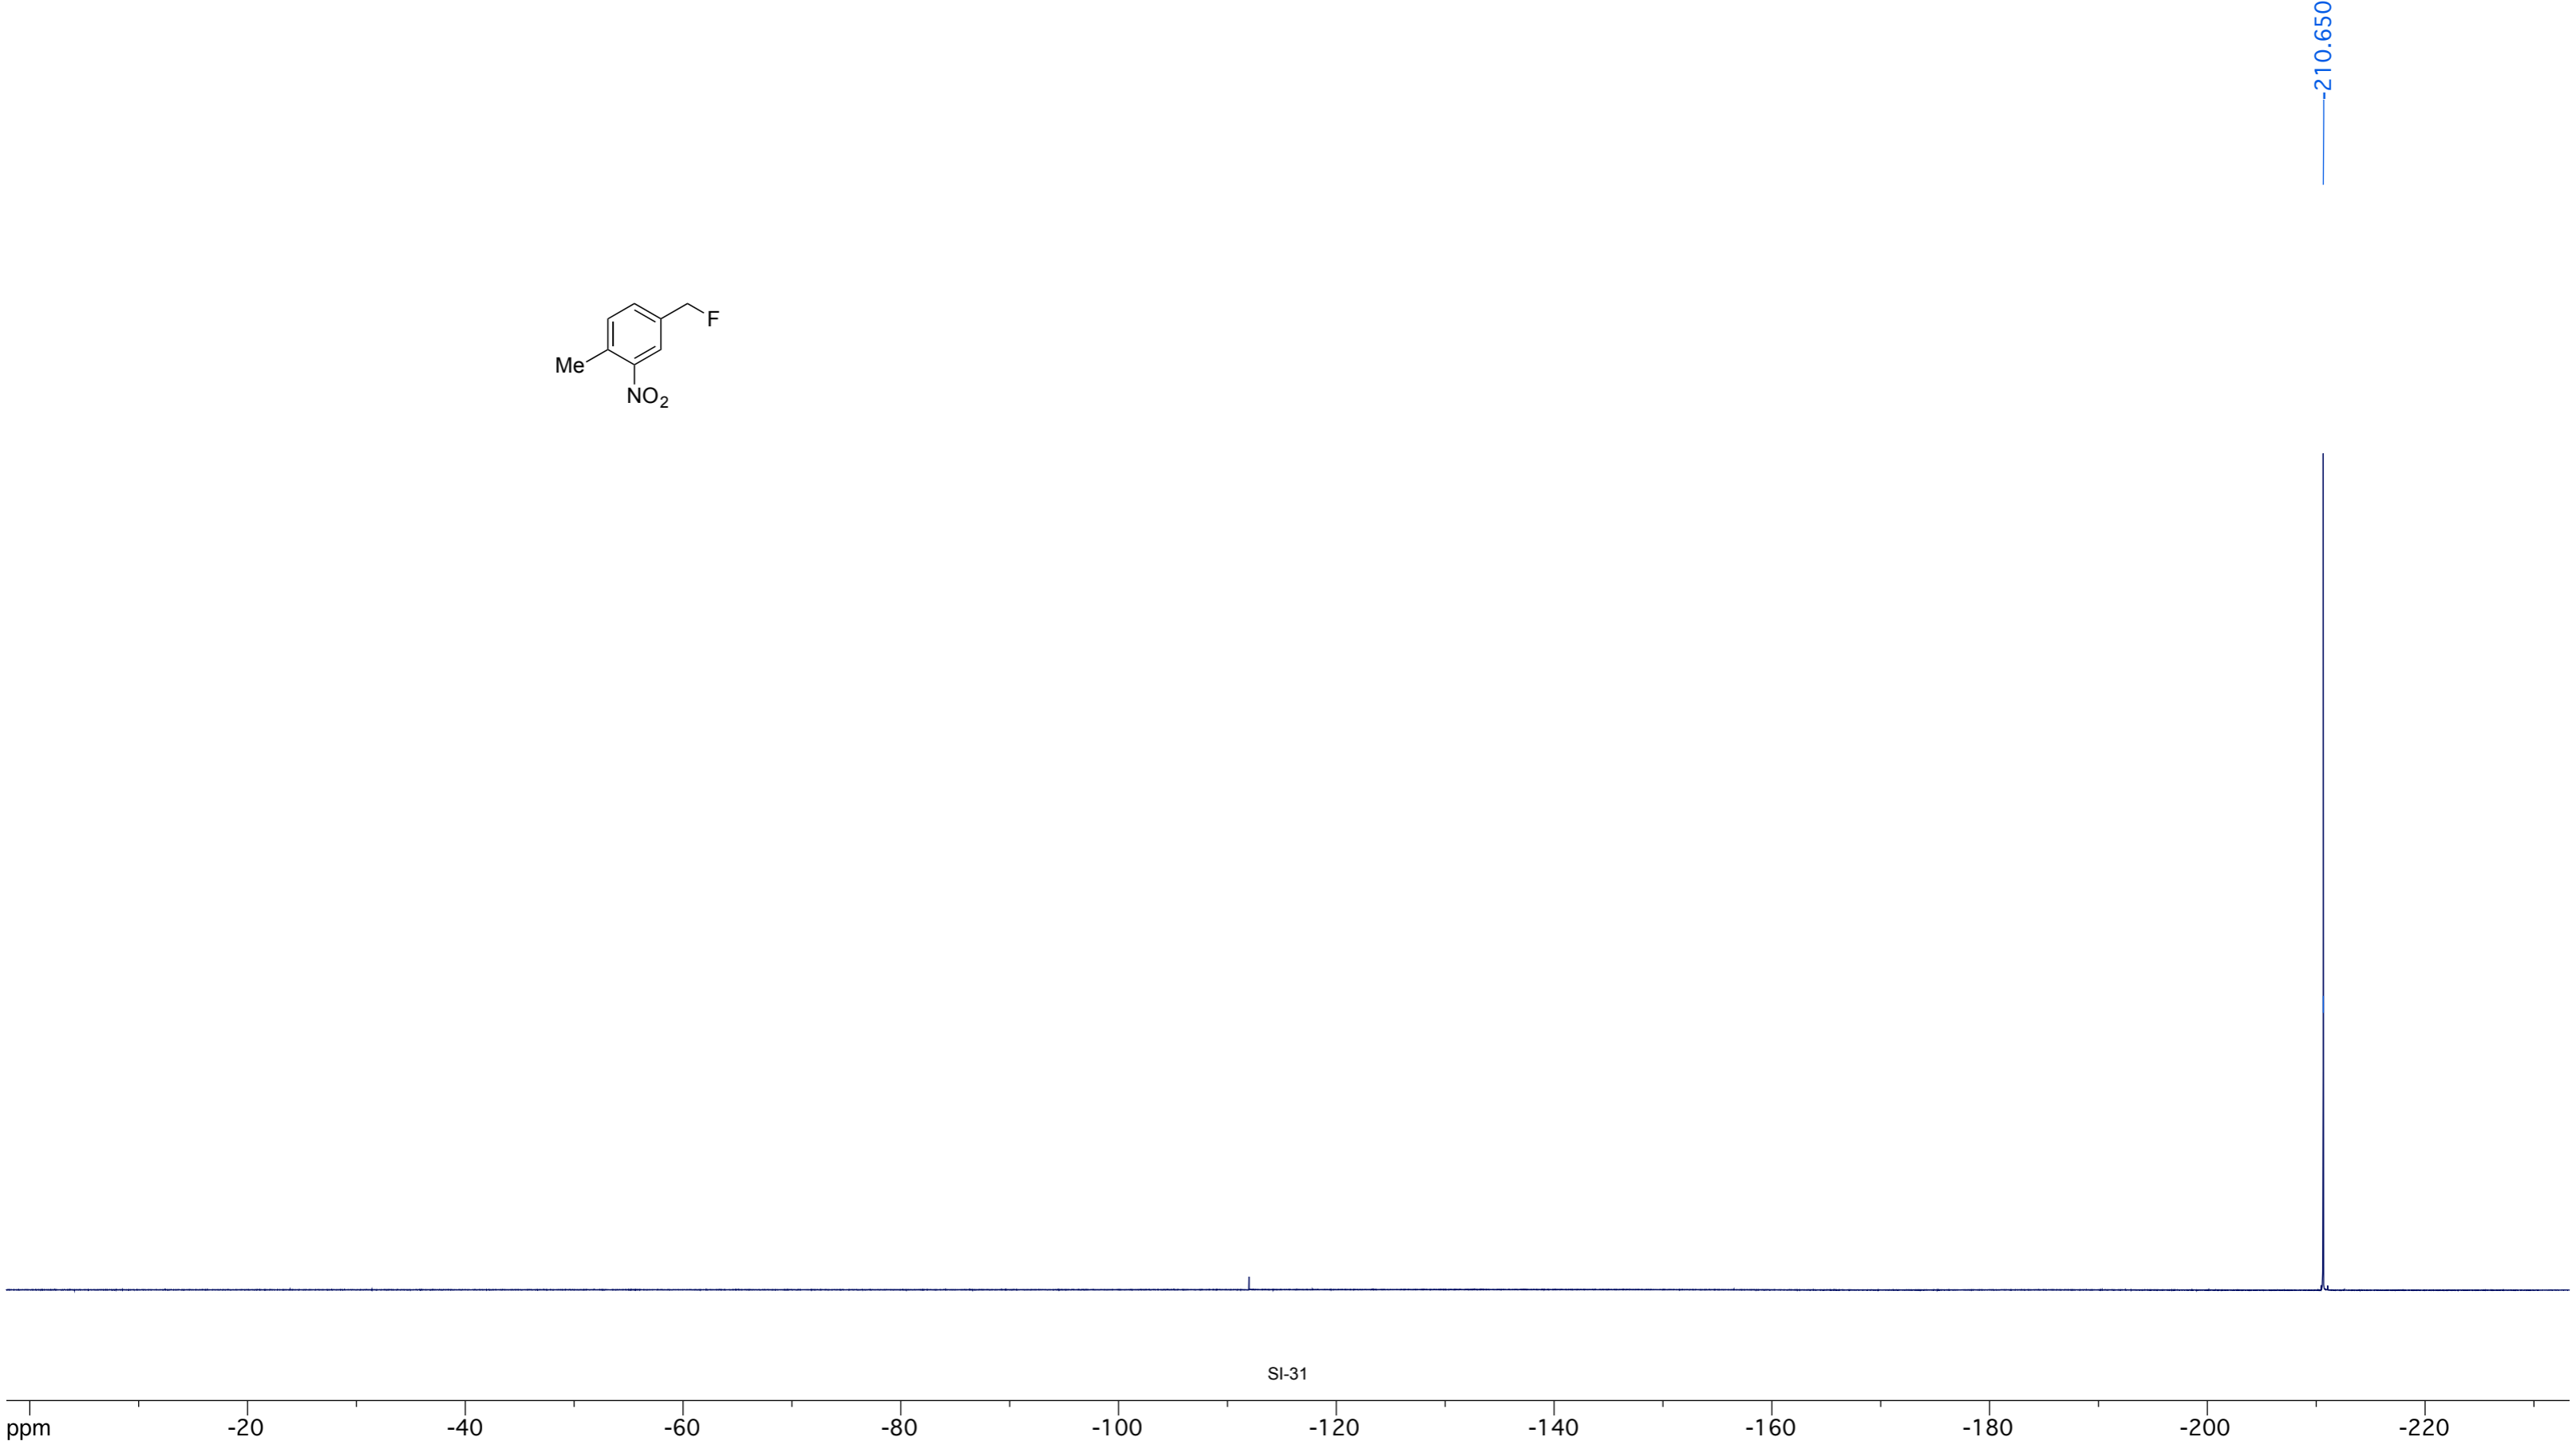

7.87  
7.81  
7.78  
7.47  
7.44

5.52  
5.36

proton 16 scans AVANCE 300B

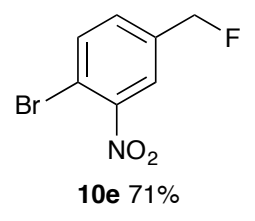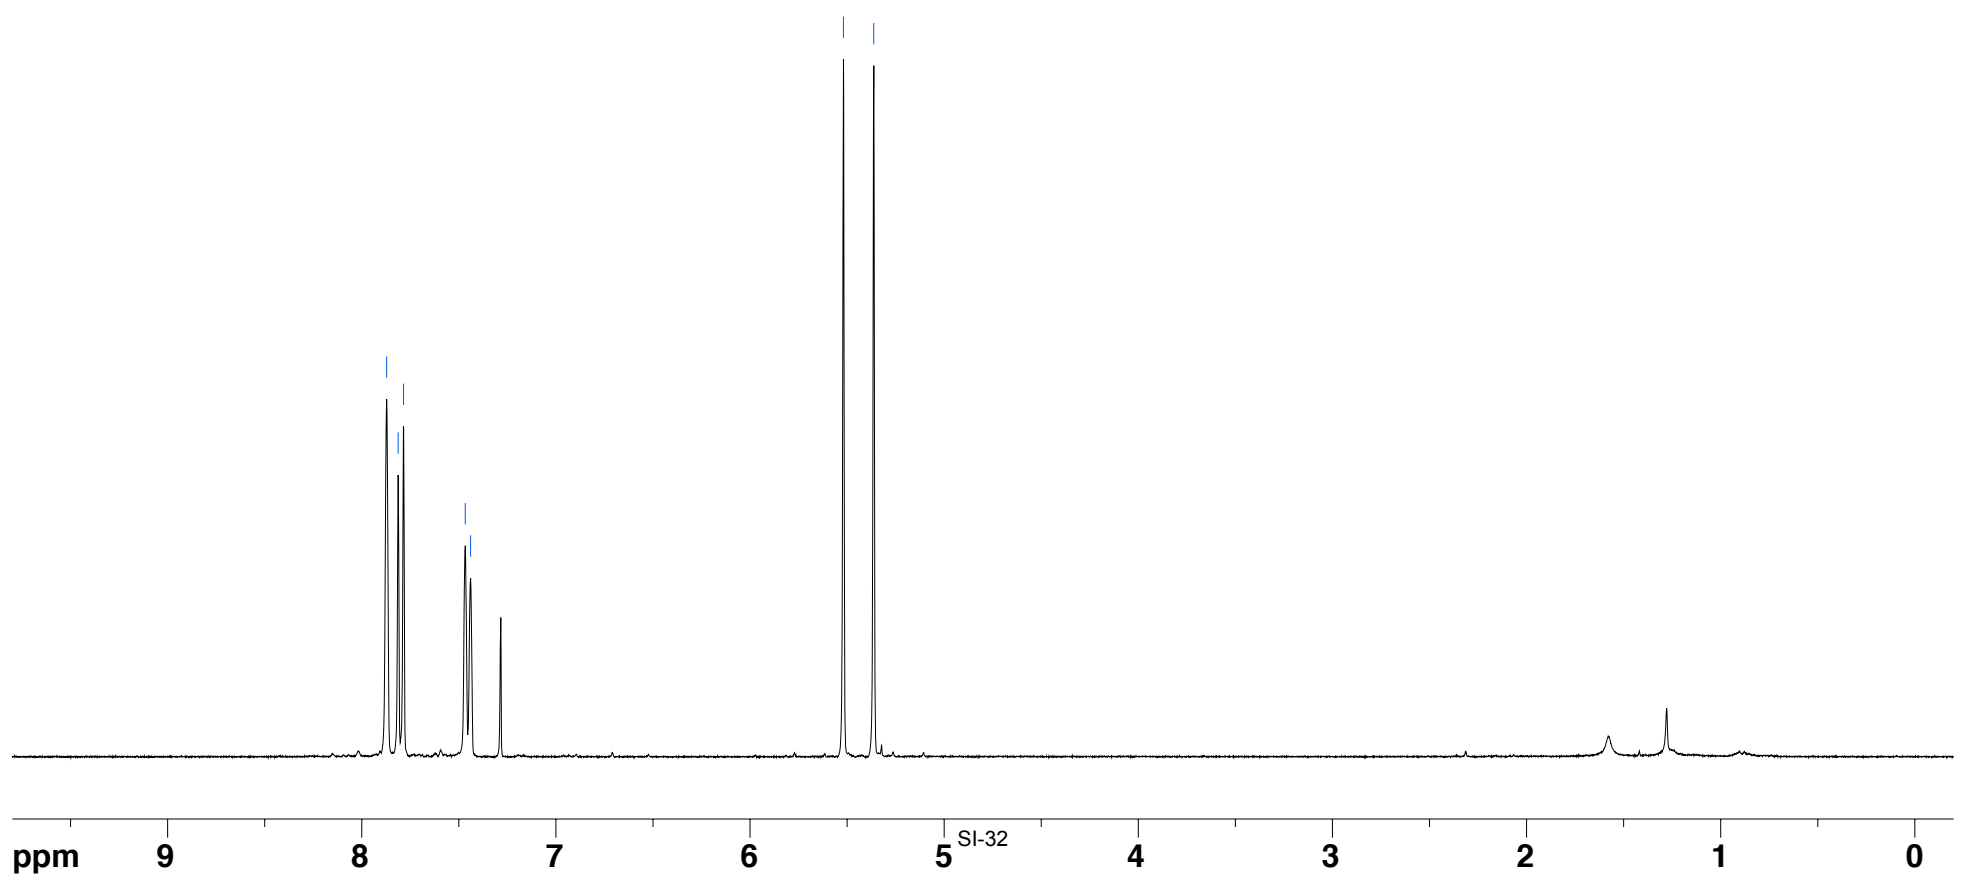



149.90  
137.47  
137.32  
135.40  
131.15  
131.10  
123.78  
123.73  
114.45  
114.43  
82.92  
77.28  
77.02  
76.77

C-13 proton Decoupled

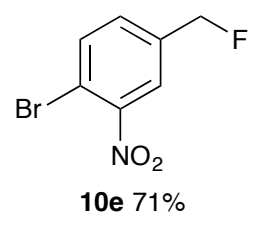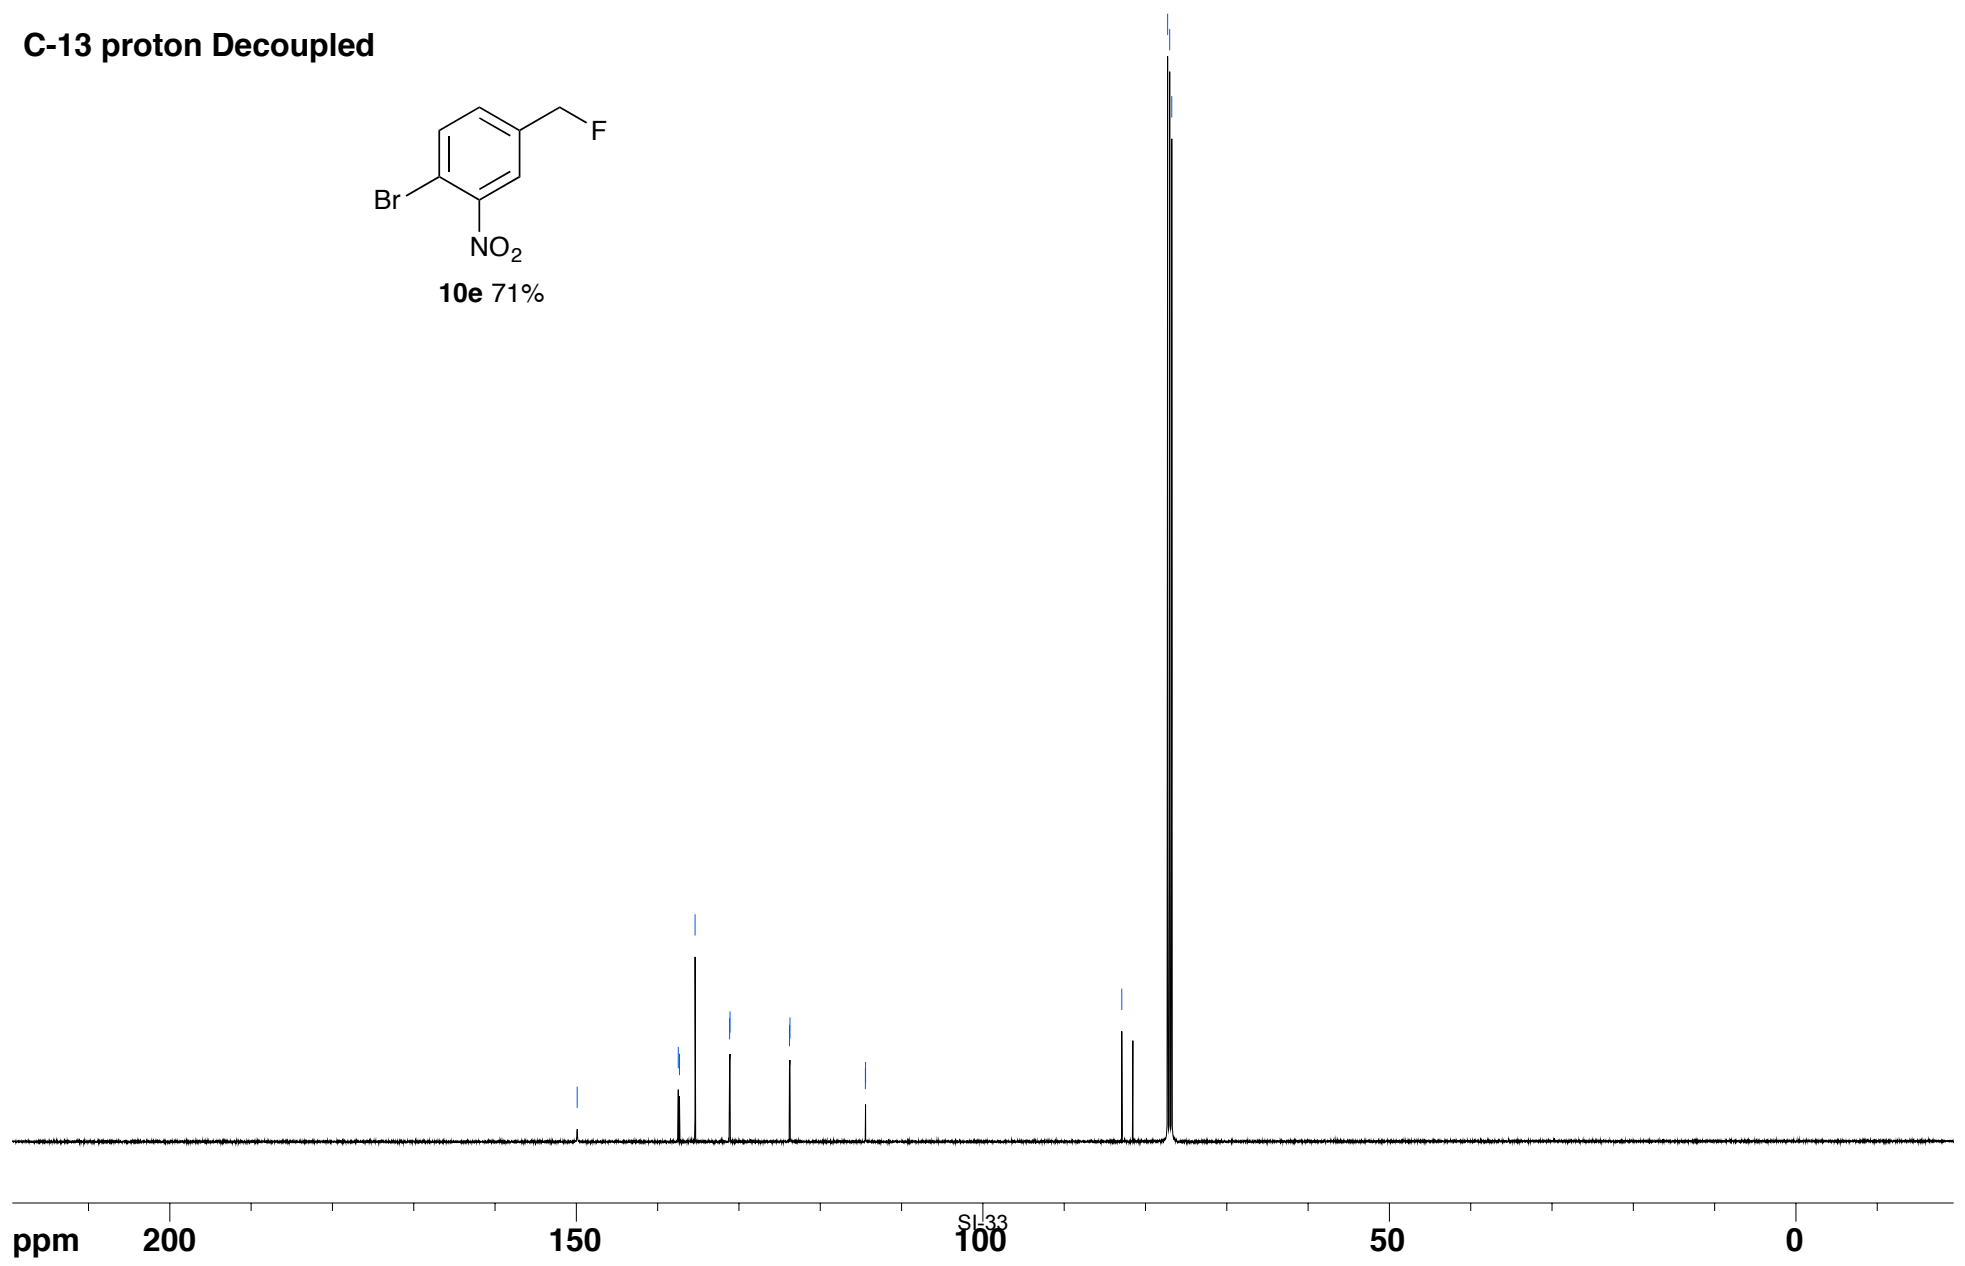

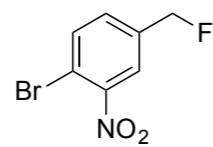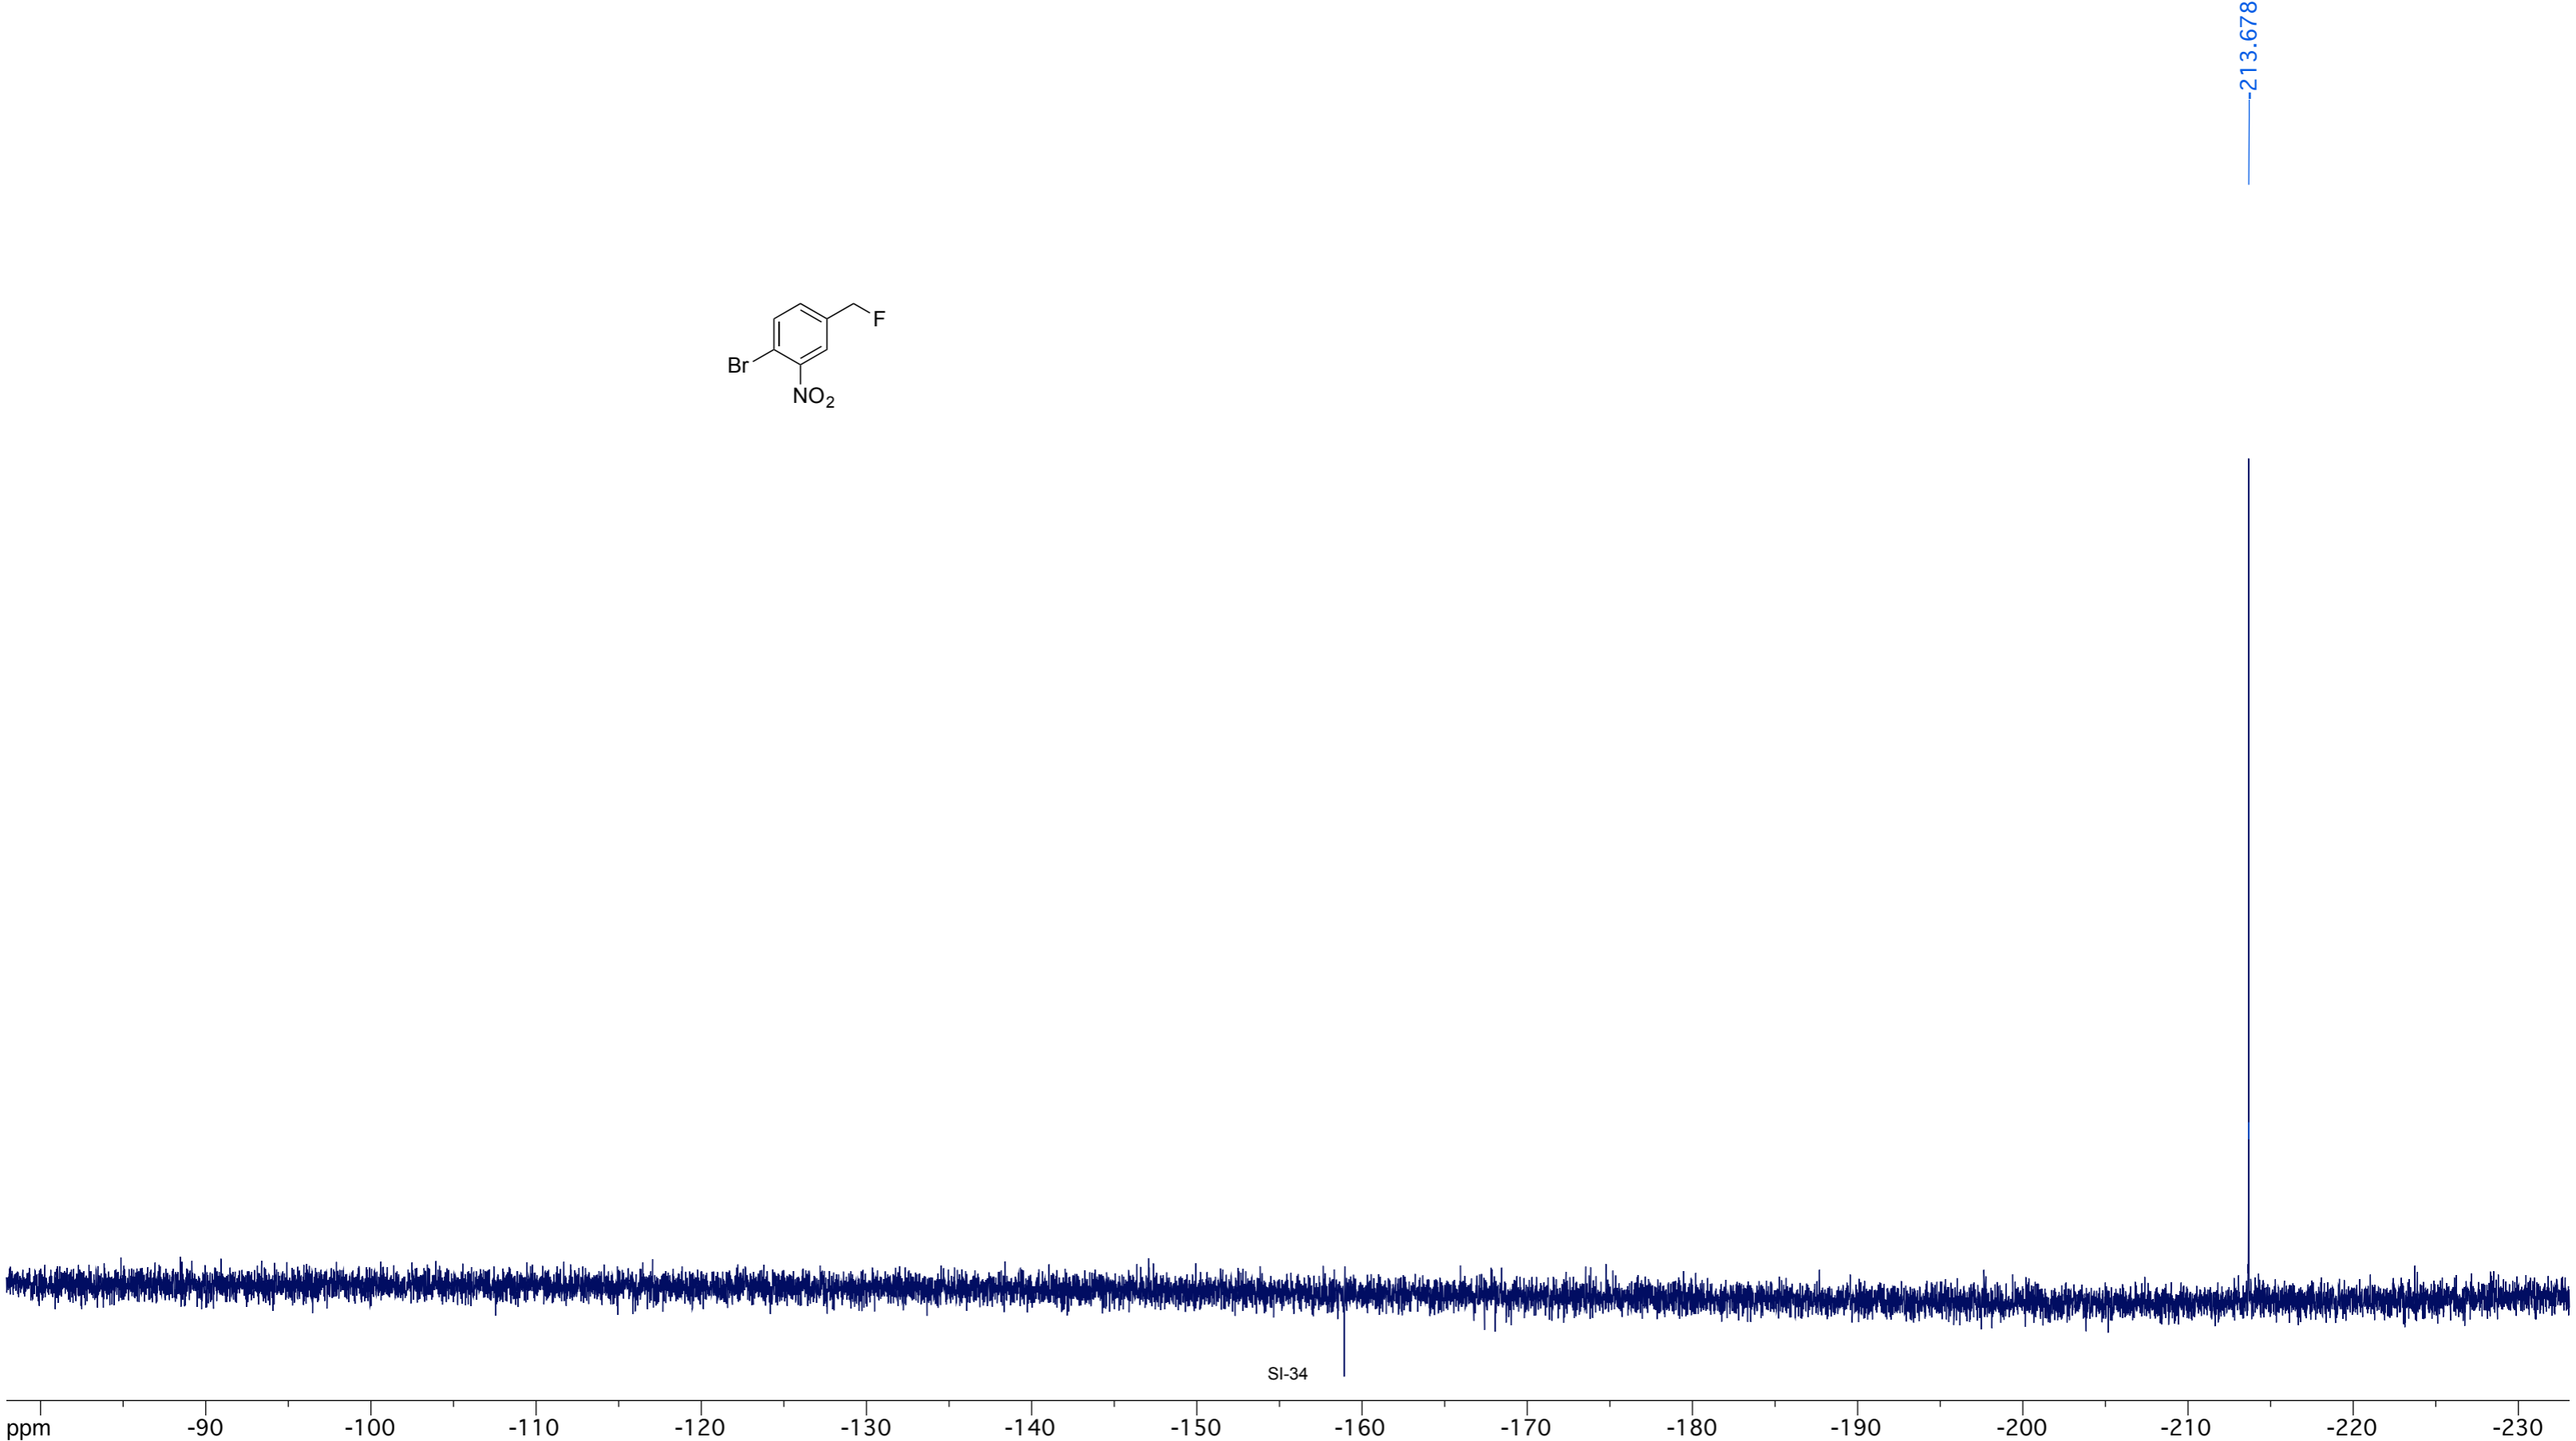

8.11  
8.08  
7.47  
7.45  
7.44  
7.28

5.55  
5.40

3.95

proton 16 scans AVANCE 300B

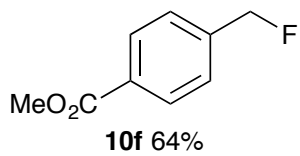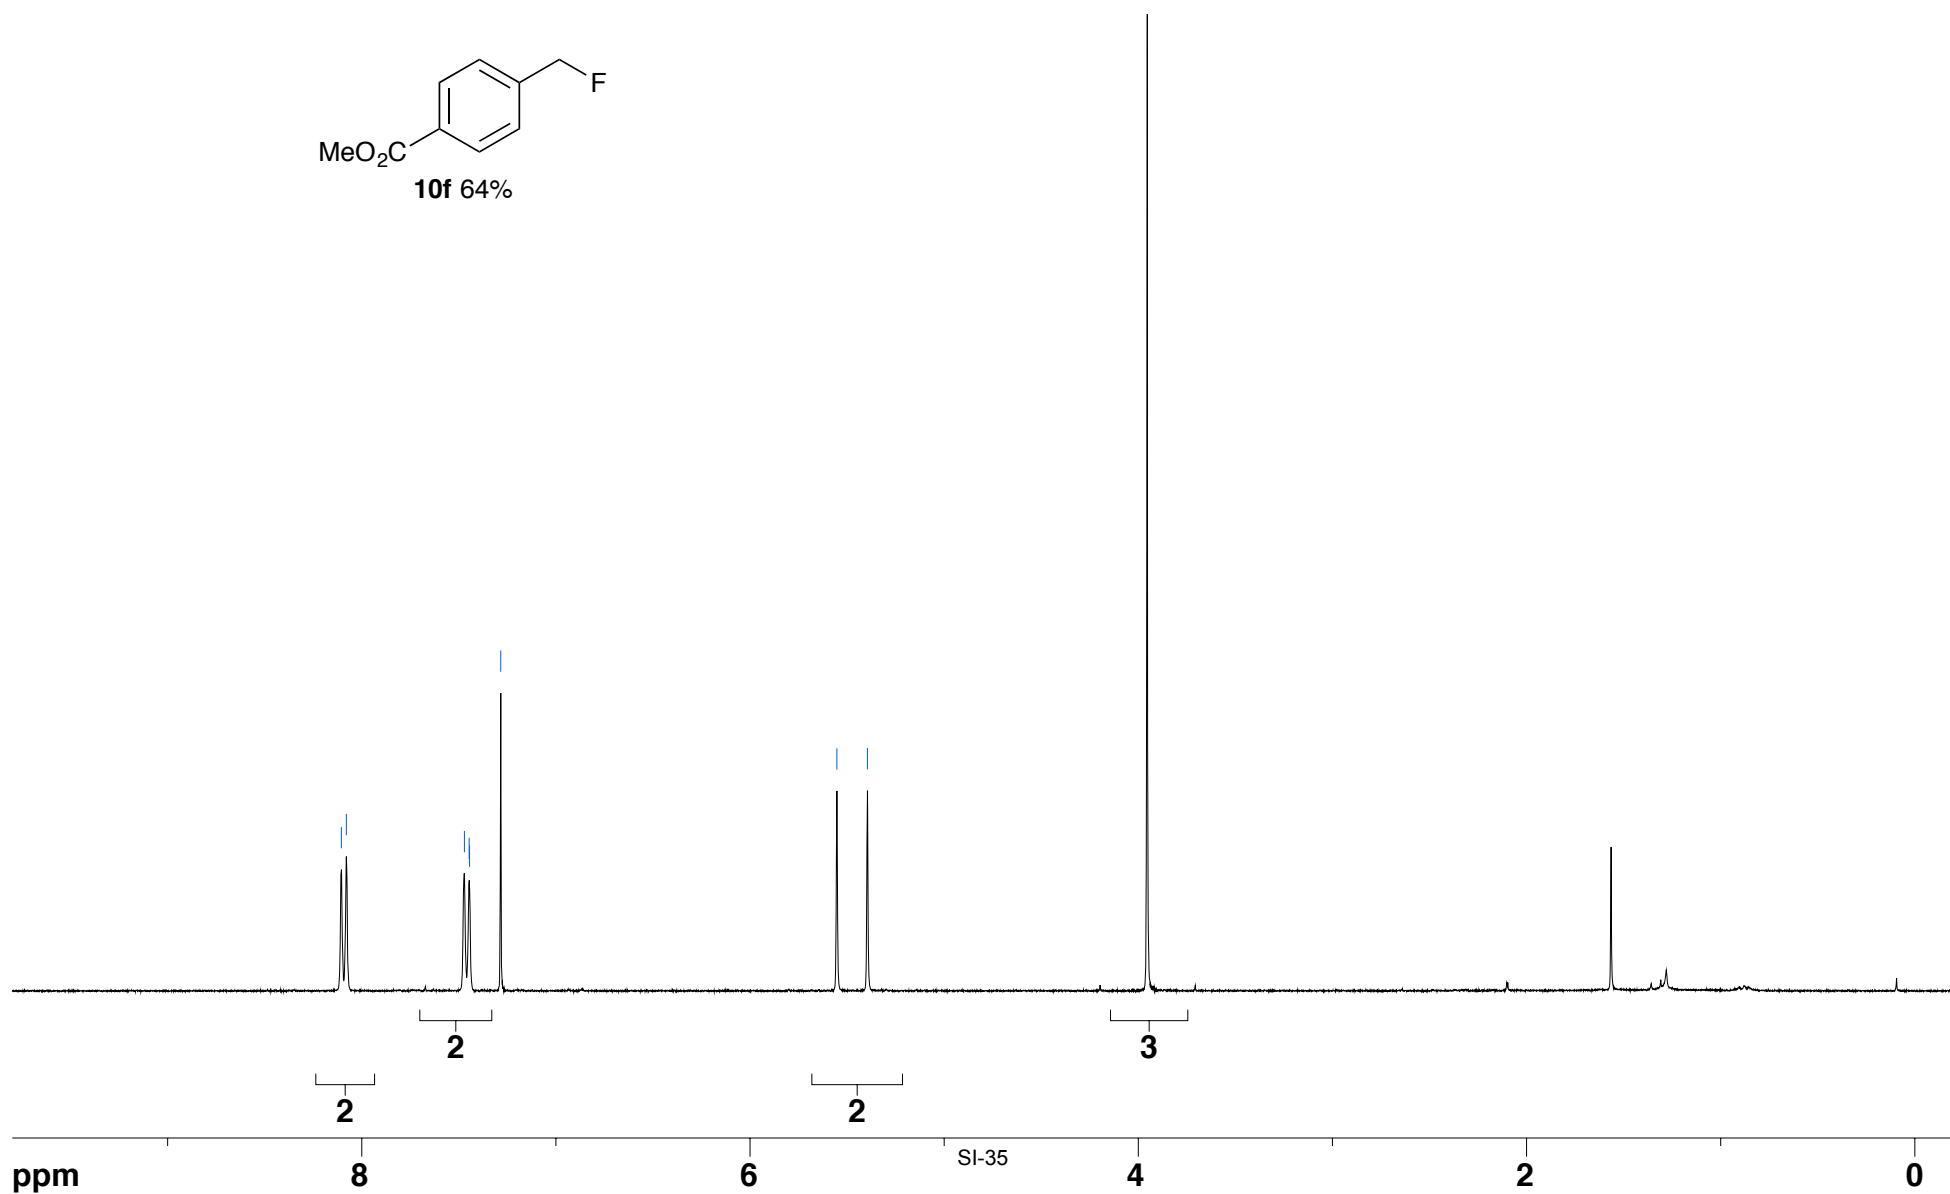

C-13 proton Decoupled

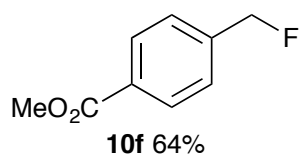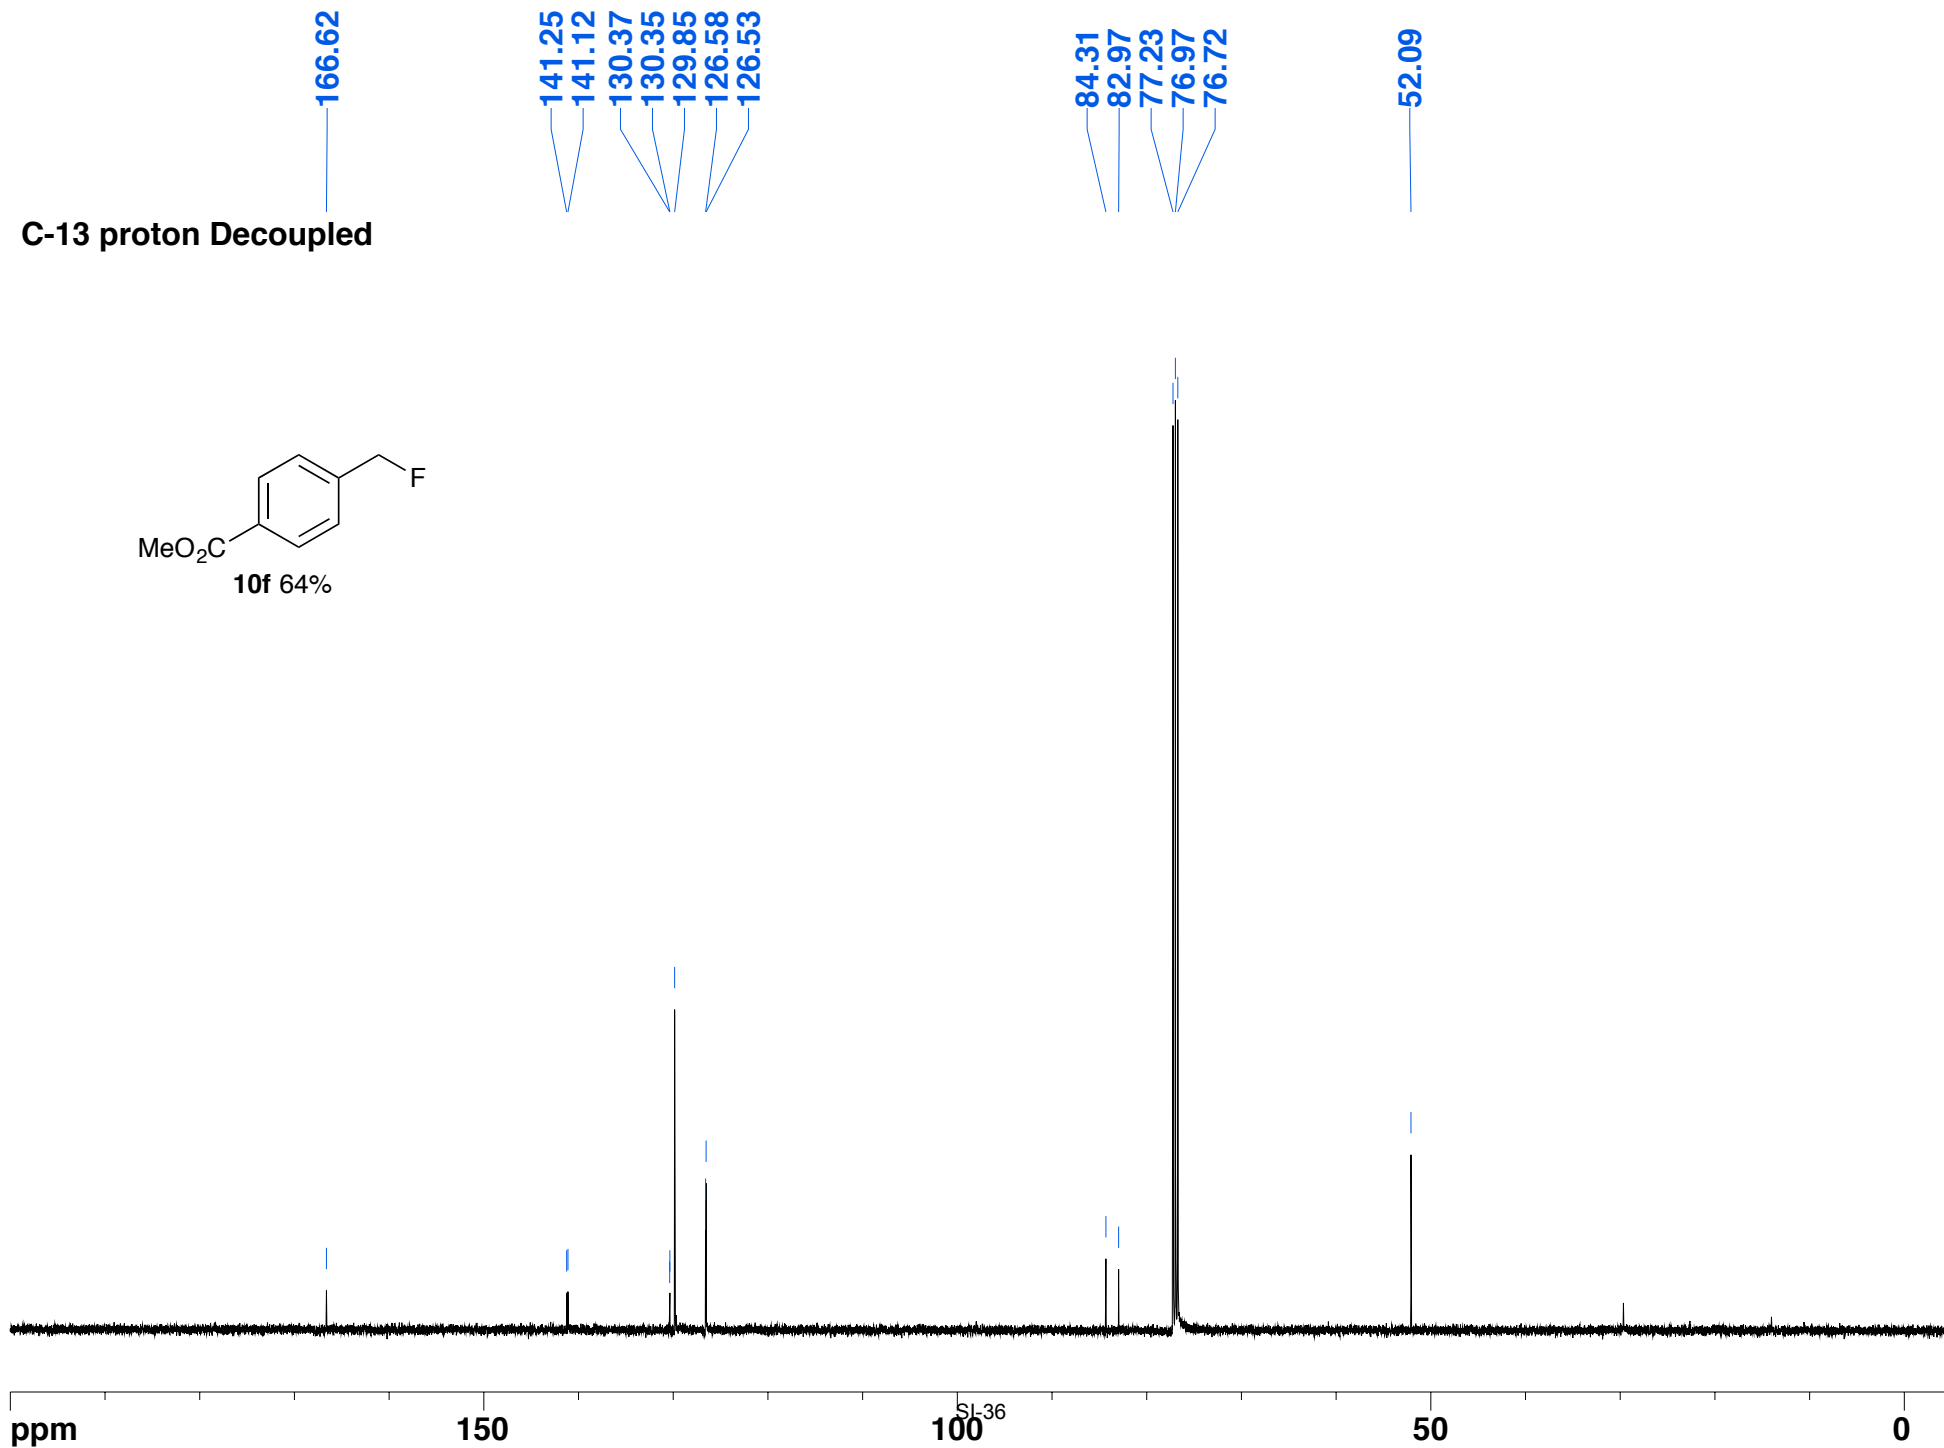

F19CPD- 300 ppm Sweep Width referenced to TFA=-76.53 ppm

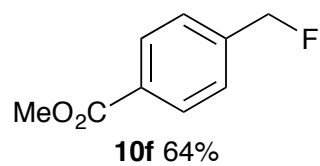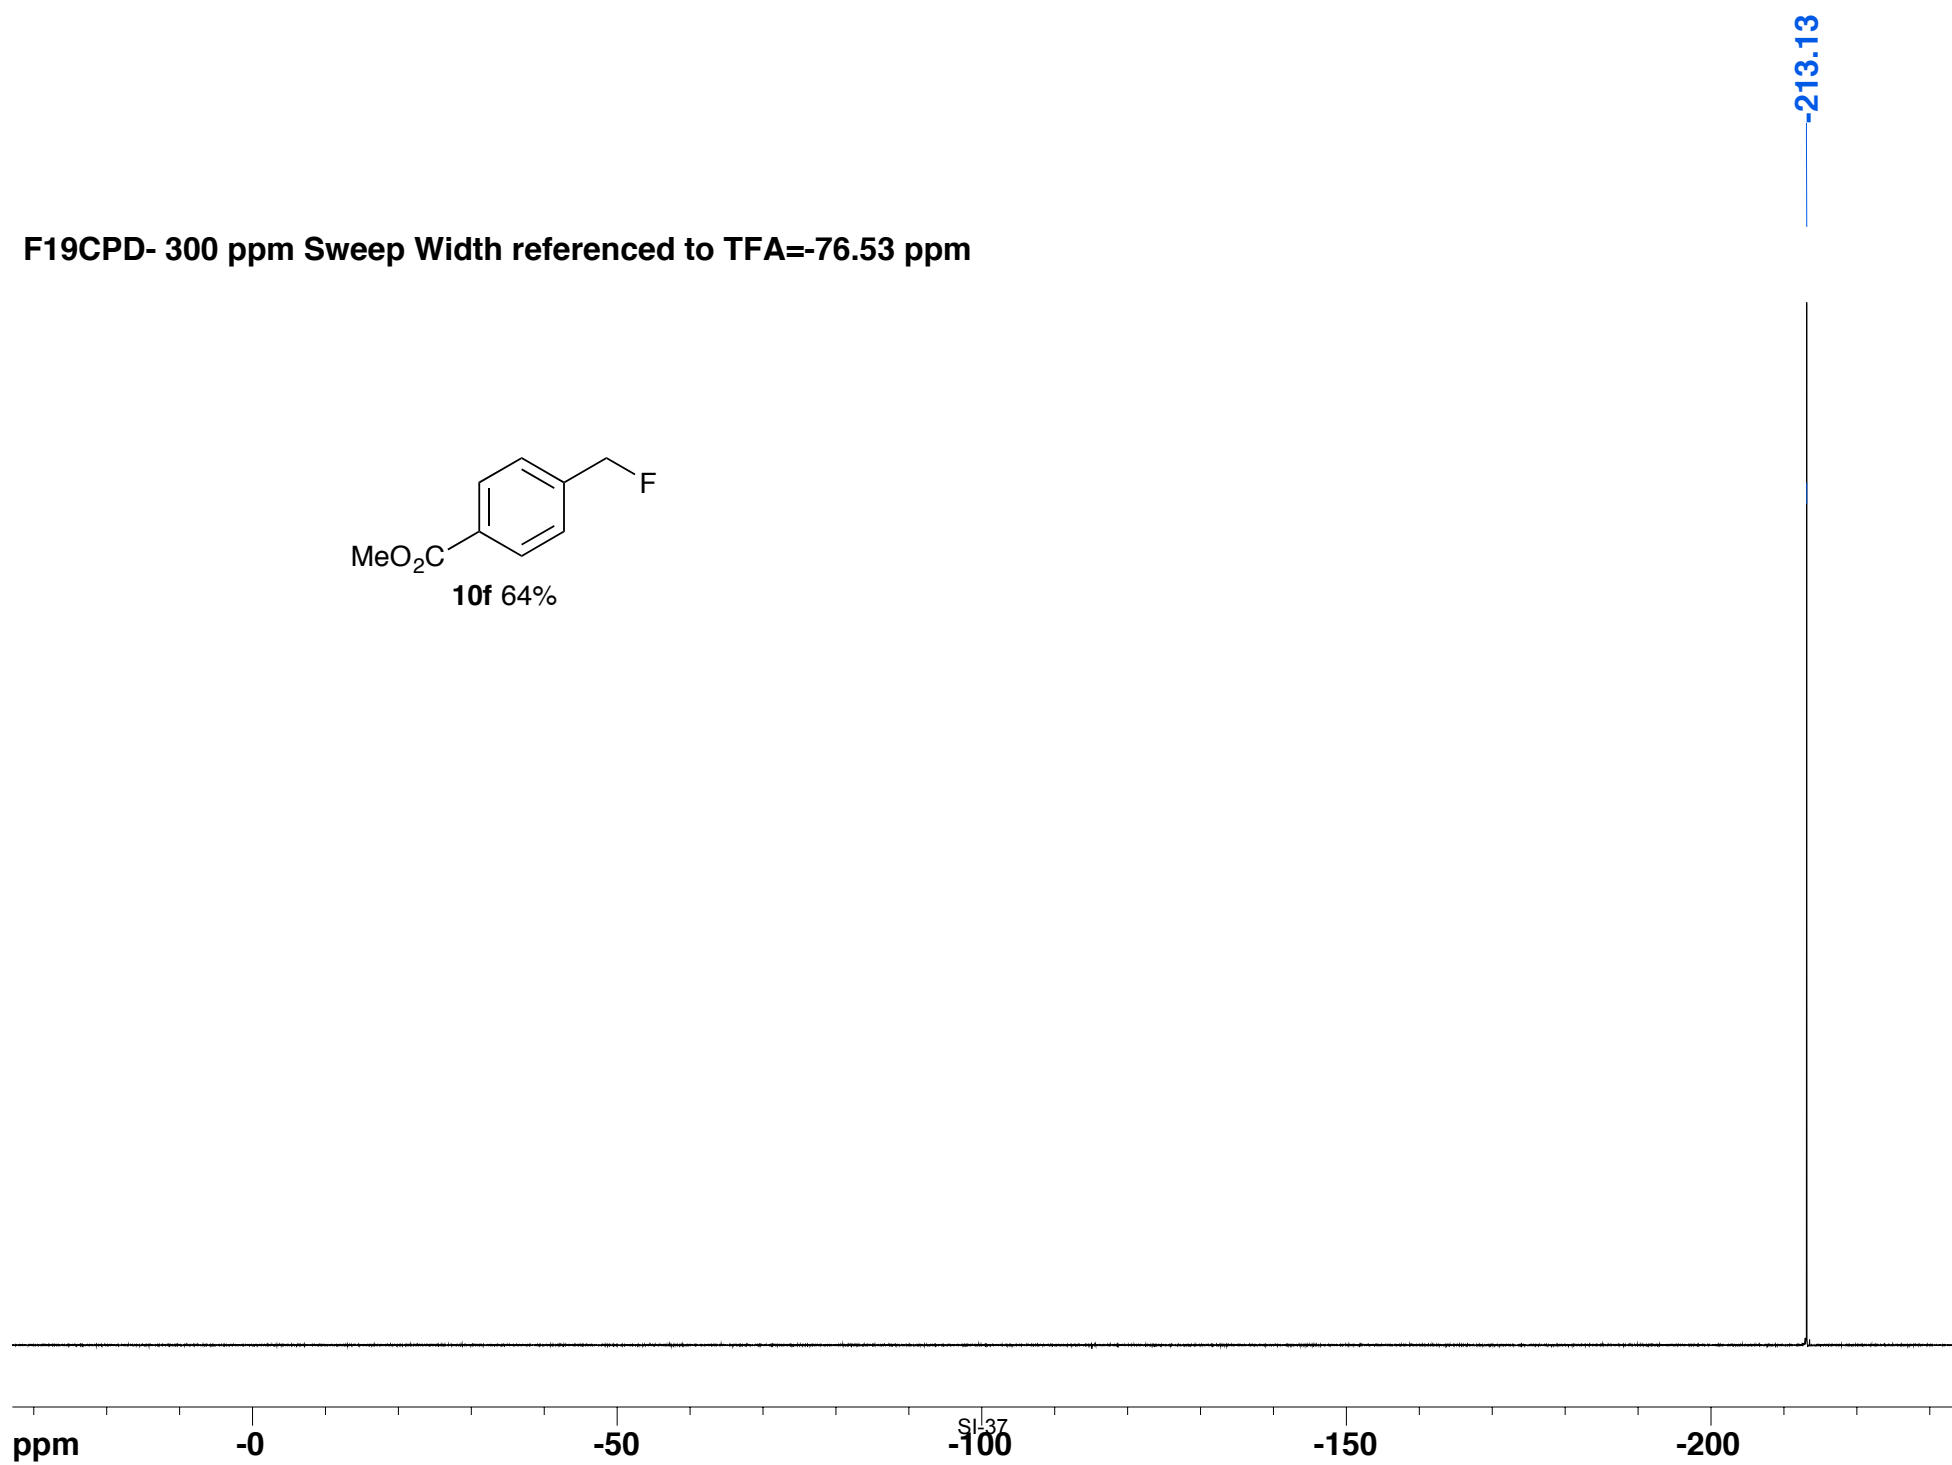

7.72  
7.69  
7.50  
7.50  
7.49  
7.47

5.55  
5.39

proton, 16 scans

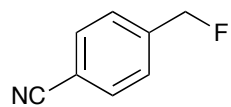

10g 71%

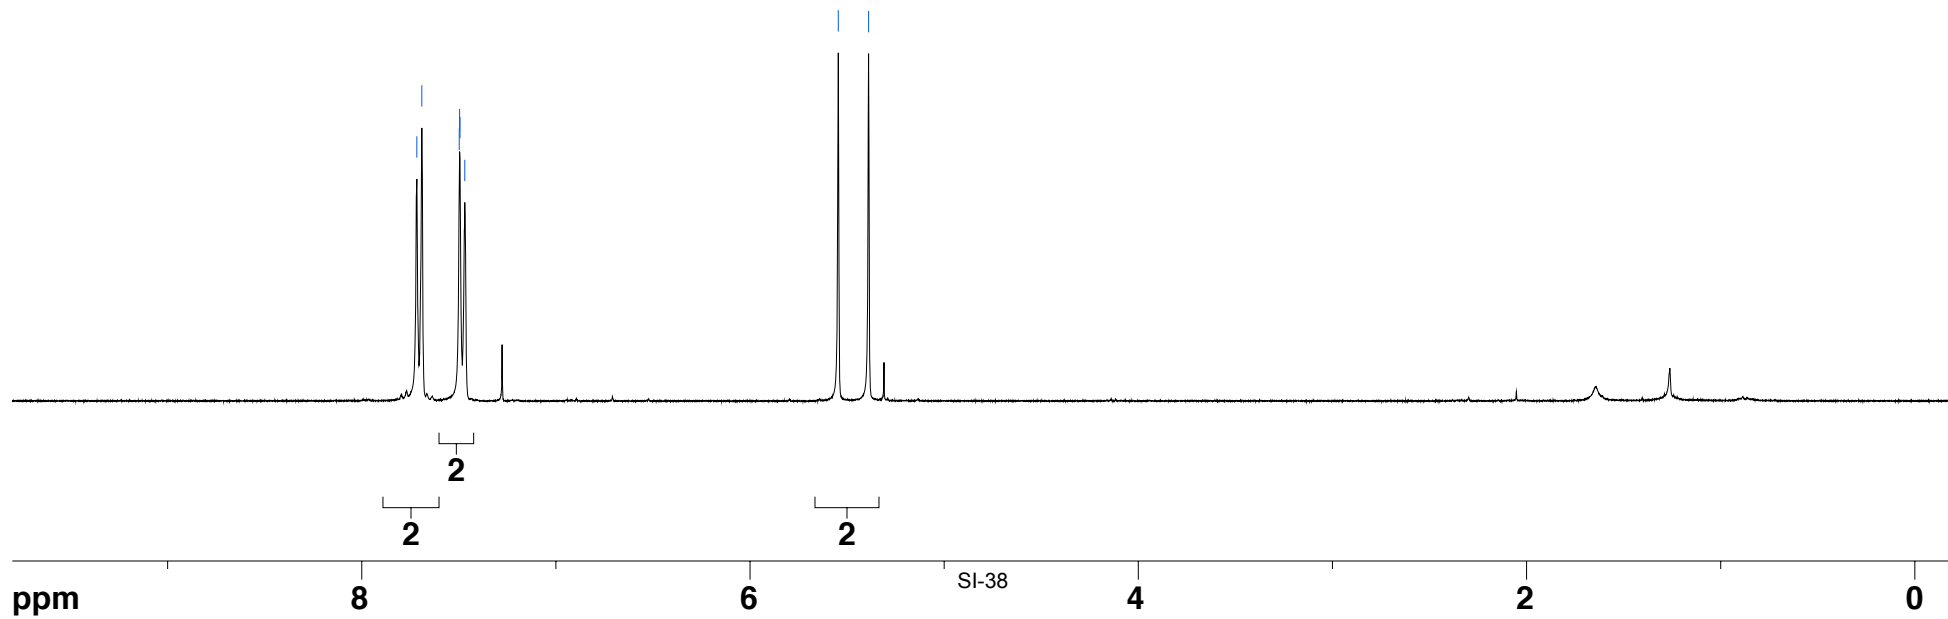

C-13 proton Decoupled

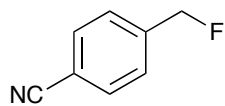

10g 71%

141.53  
141.39  
132.42  
127.03  
126.98  
118.49  
112.38  
112.37  
83.81  
82.46  
77.31  
77.05  
76.80

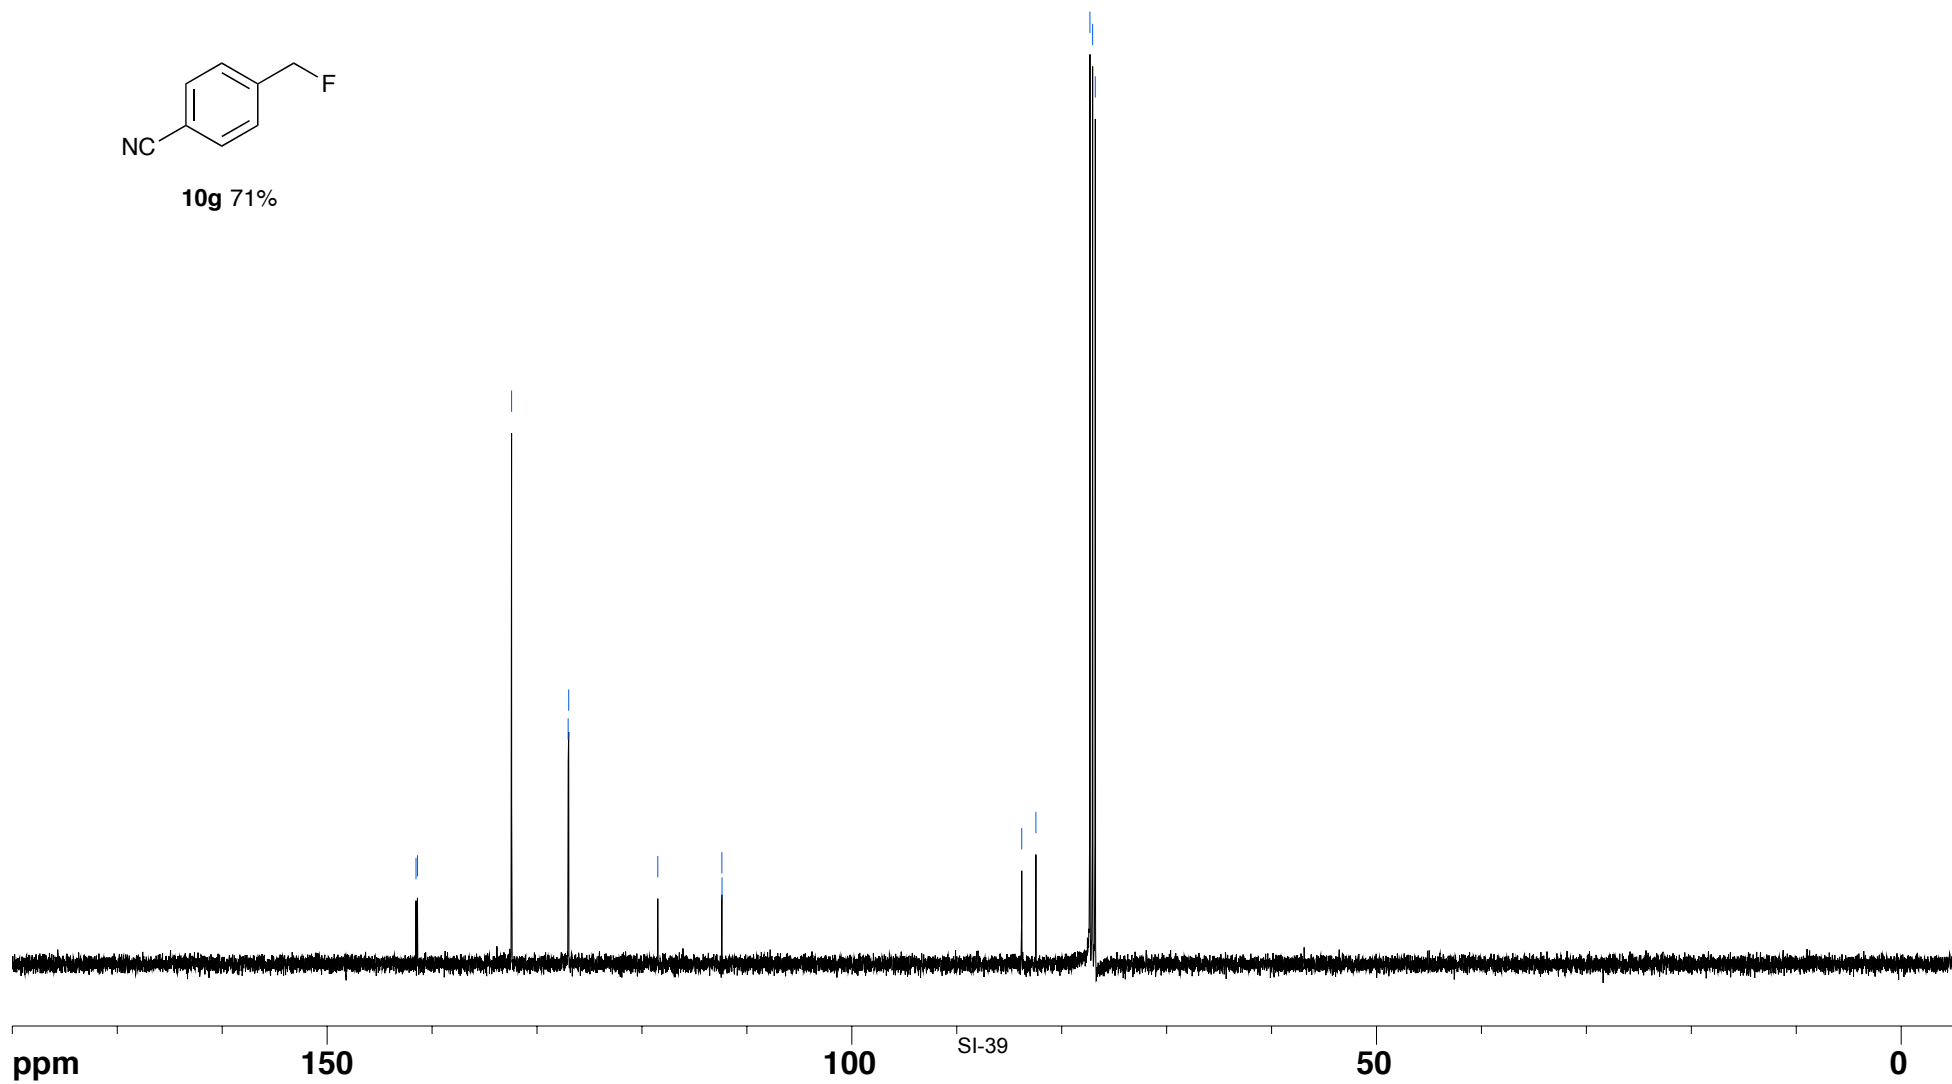

F19CPD- 300 ppm Sweep Width referenced to TFA=-76.53 ppm

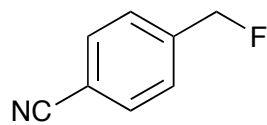

10g 71%

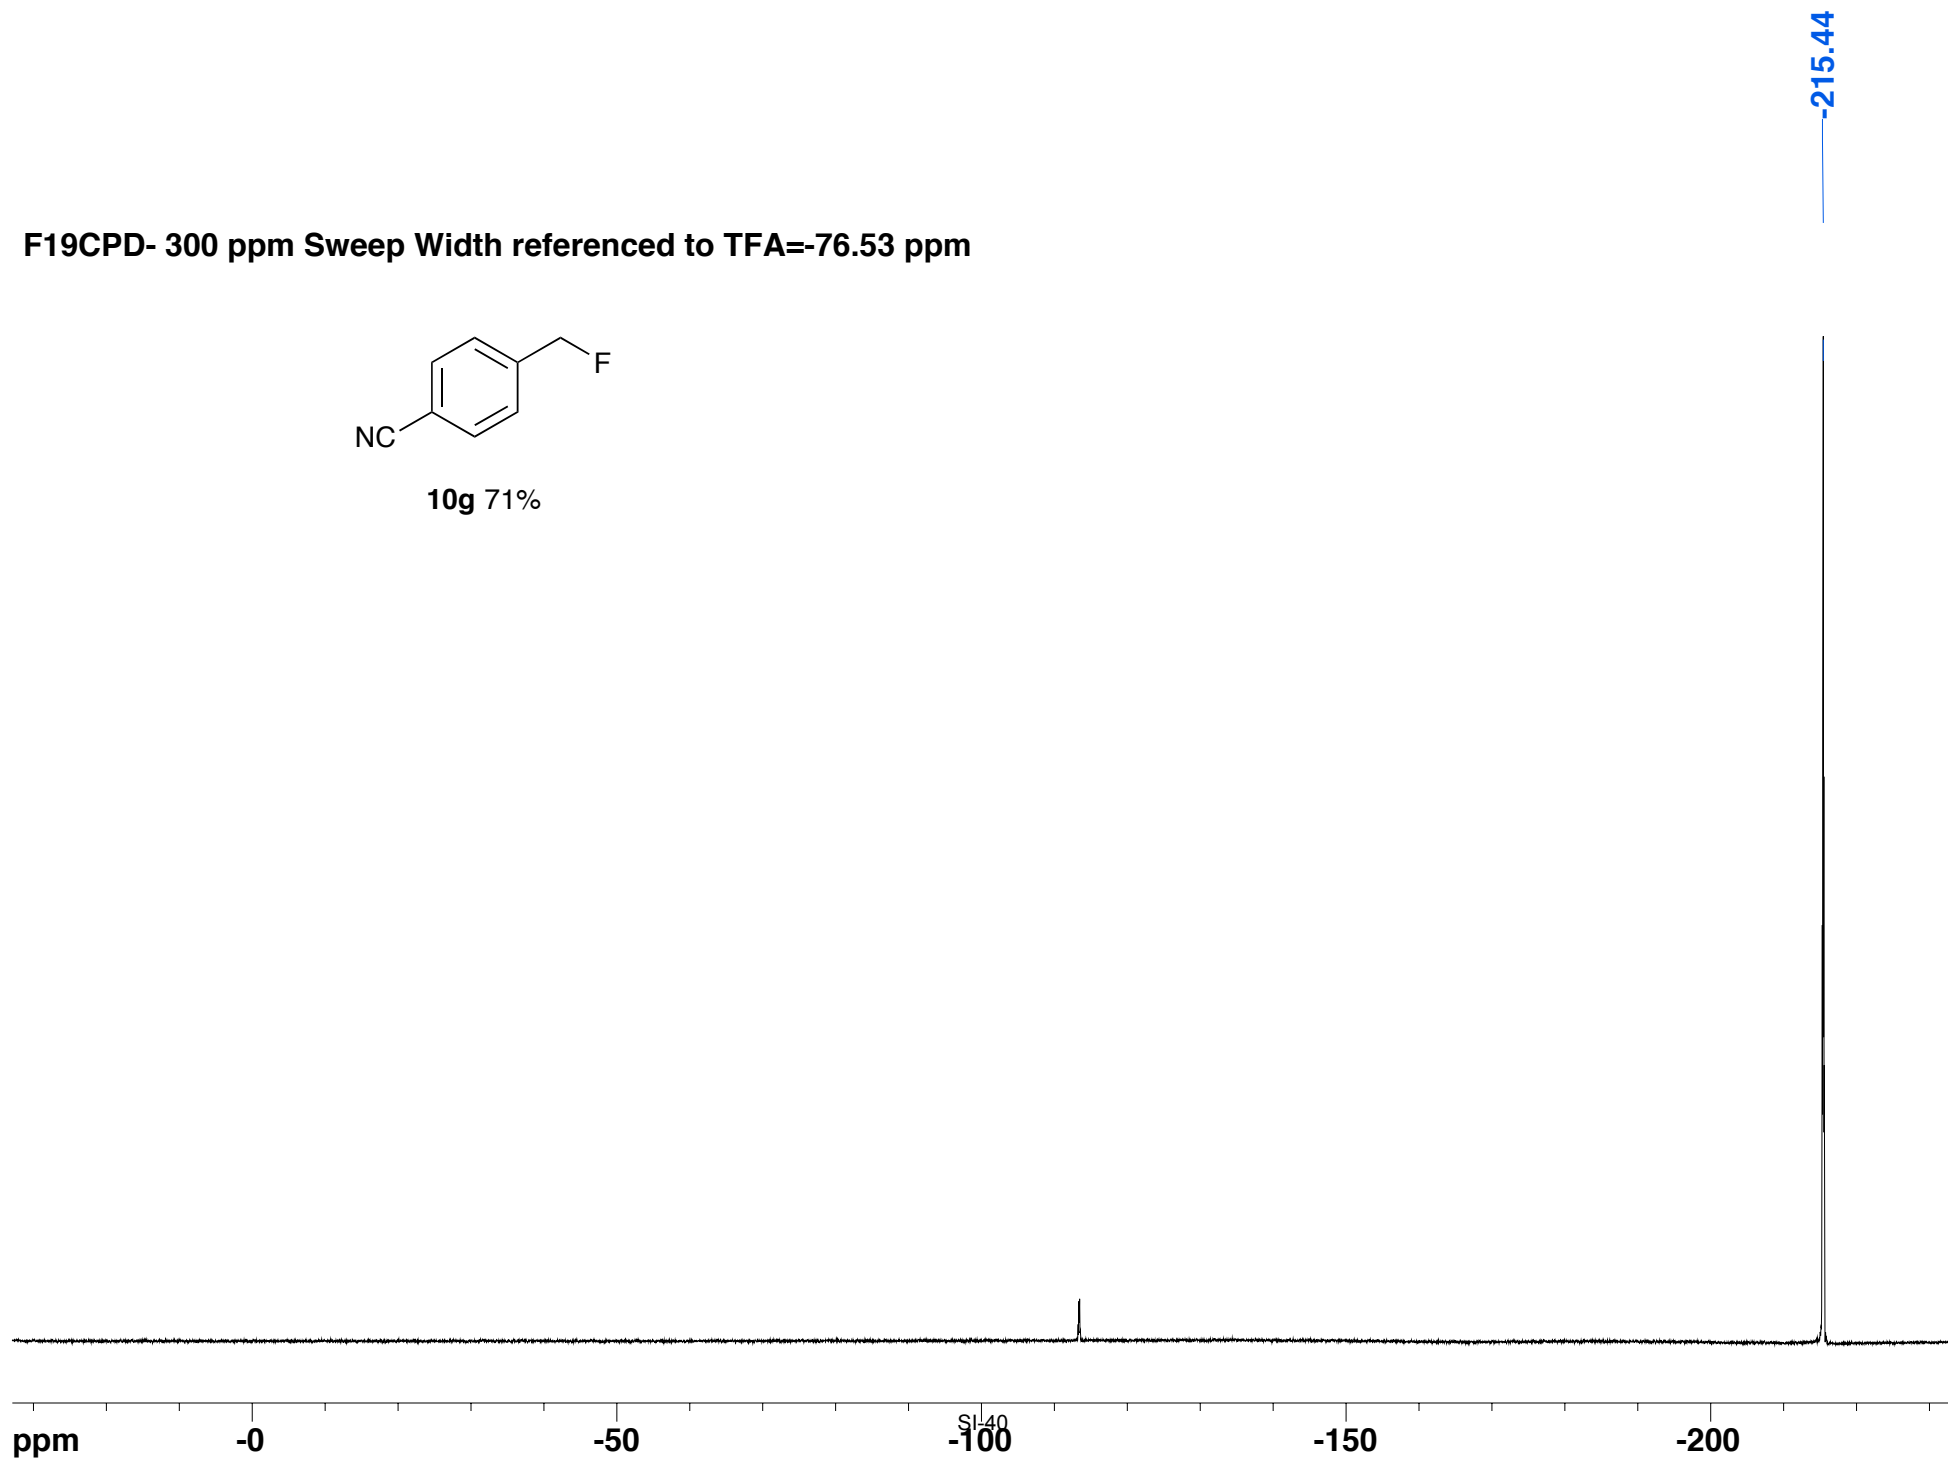



7.69  
7.69  
7.69  
7.67  
7.64  
7.62  
7.56  
7.54  
7.53

5.49  
5.39

Proton, 16 Scans AVANCE 500

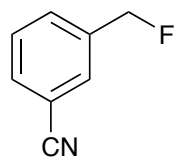

10h 73%

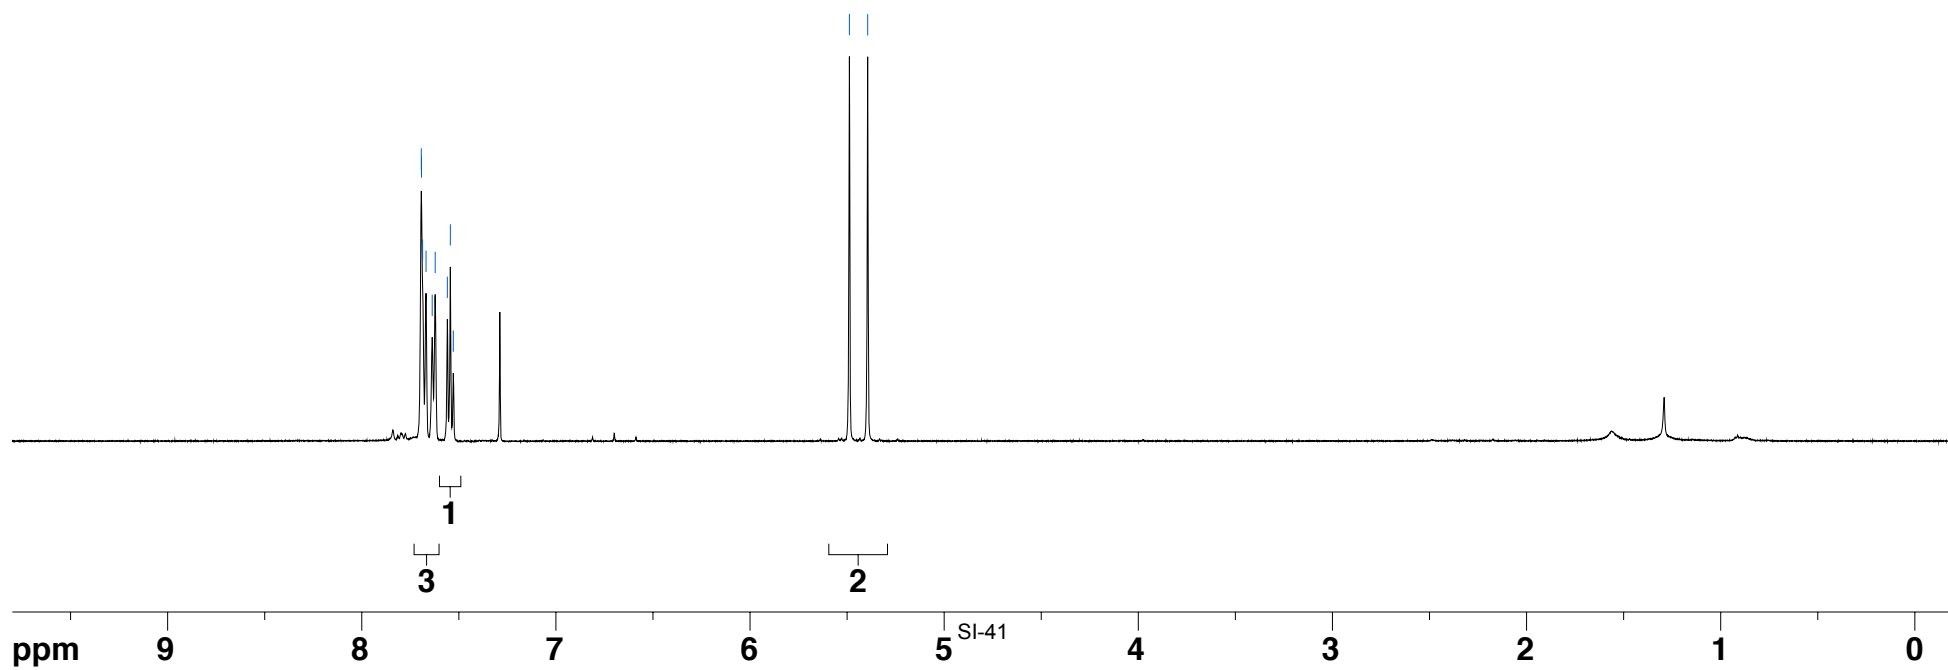

**C-13 proton Decoupled**

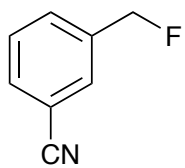

10h 73%

137.91  
137.76  
132.17  
132.15  
131.07  
131.02  
130.38  
130.33  
129.45  
118.26  
112.99

83.62  
82.27  
77.23  
76.98  
76.72

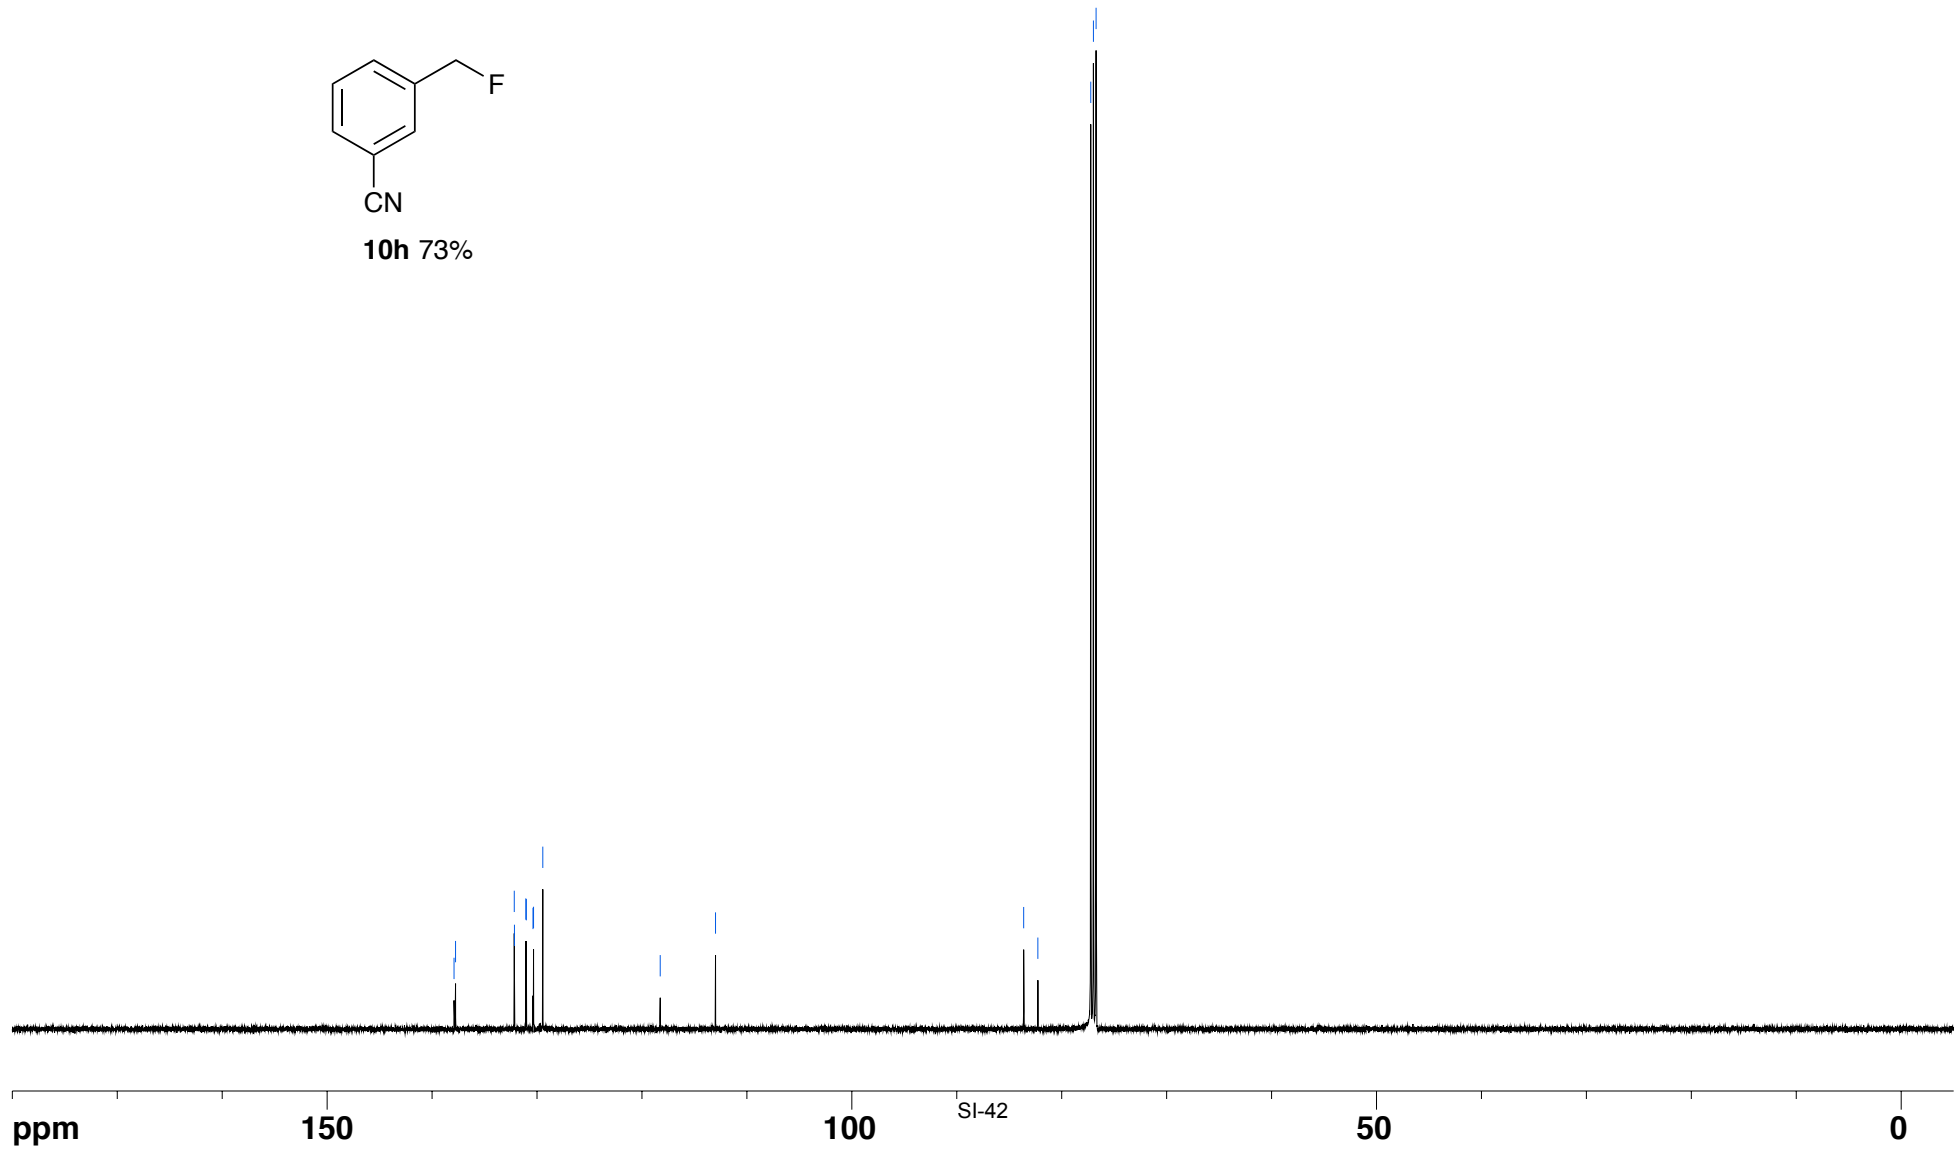

F19CPD- 300 ppm Sweep Width referenced to TFA=-76.53 ppm

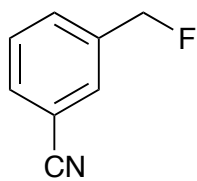

10h 73%

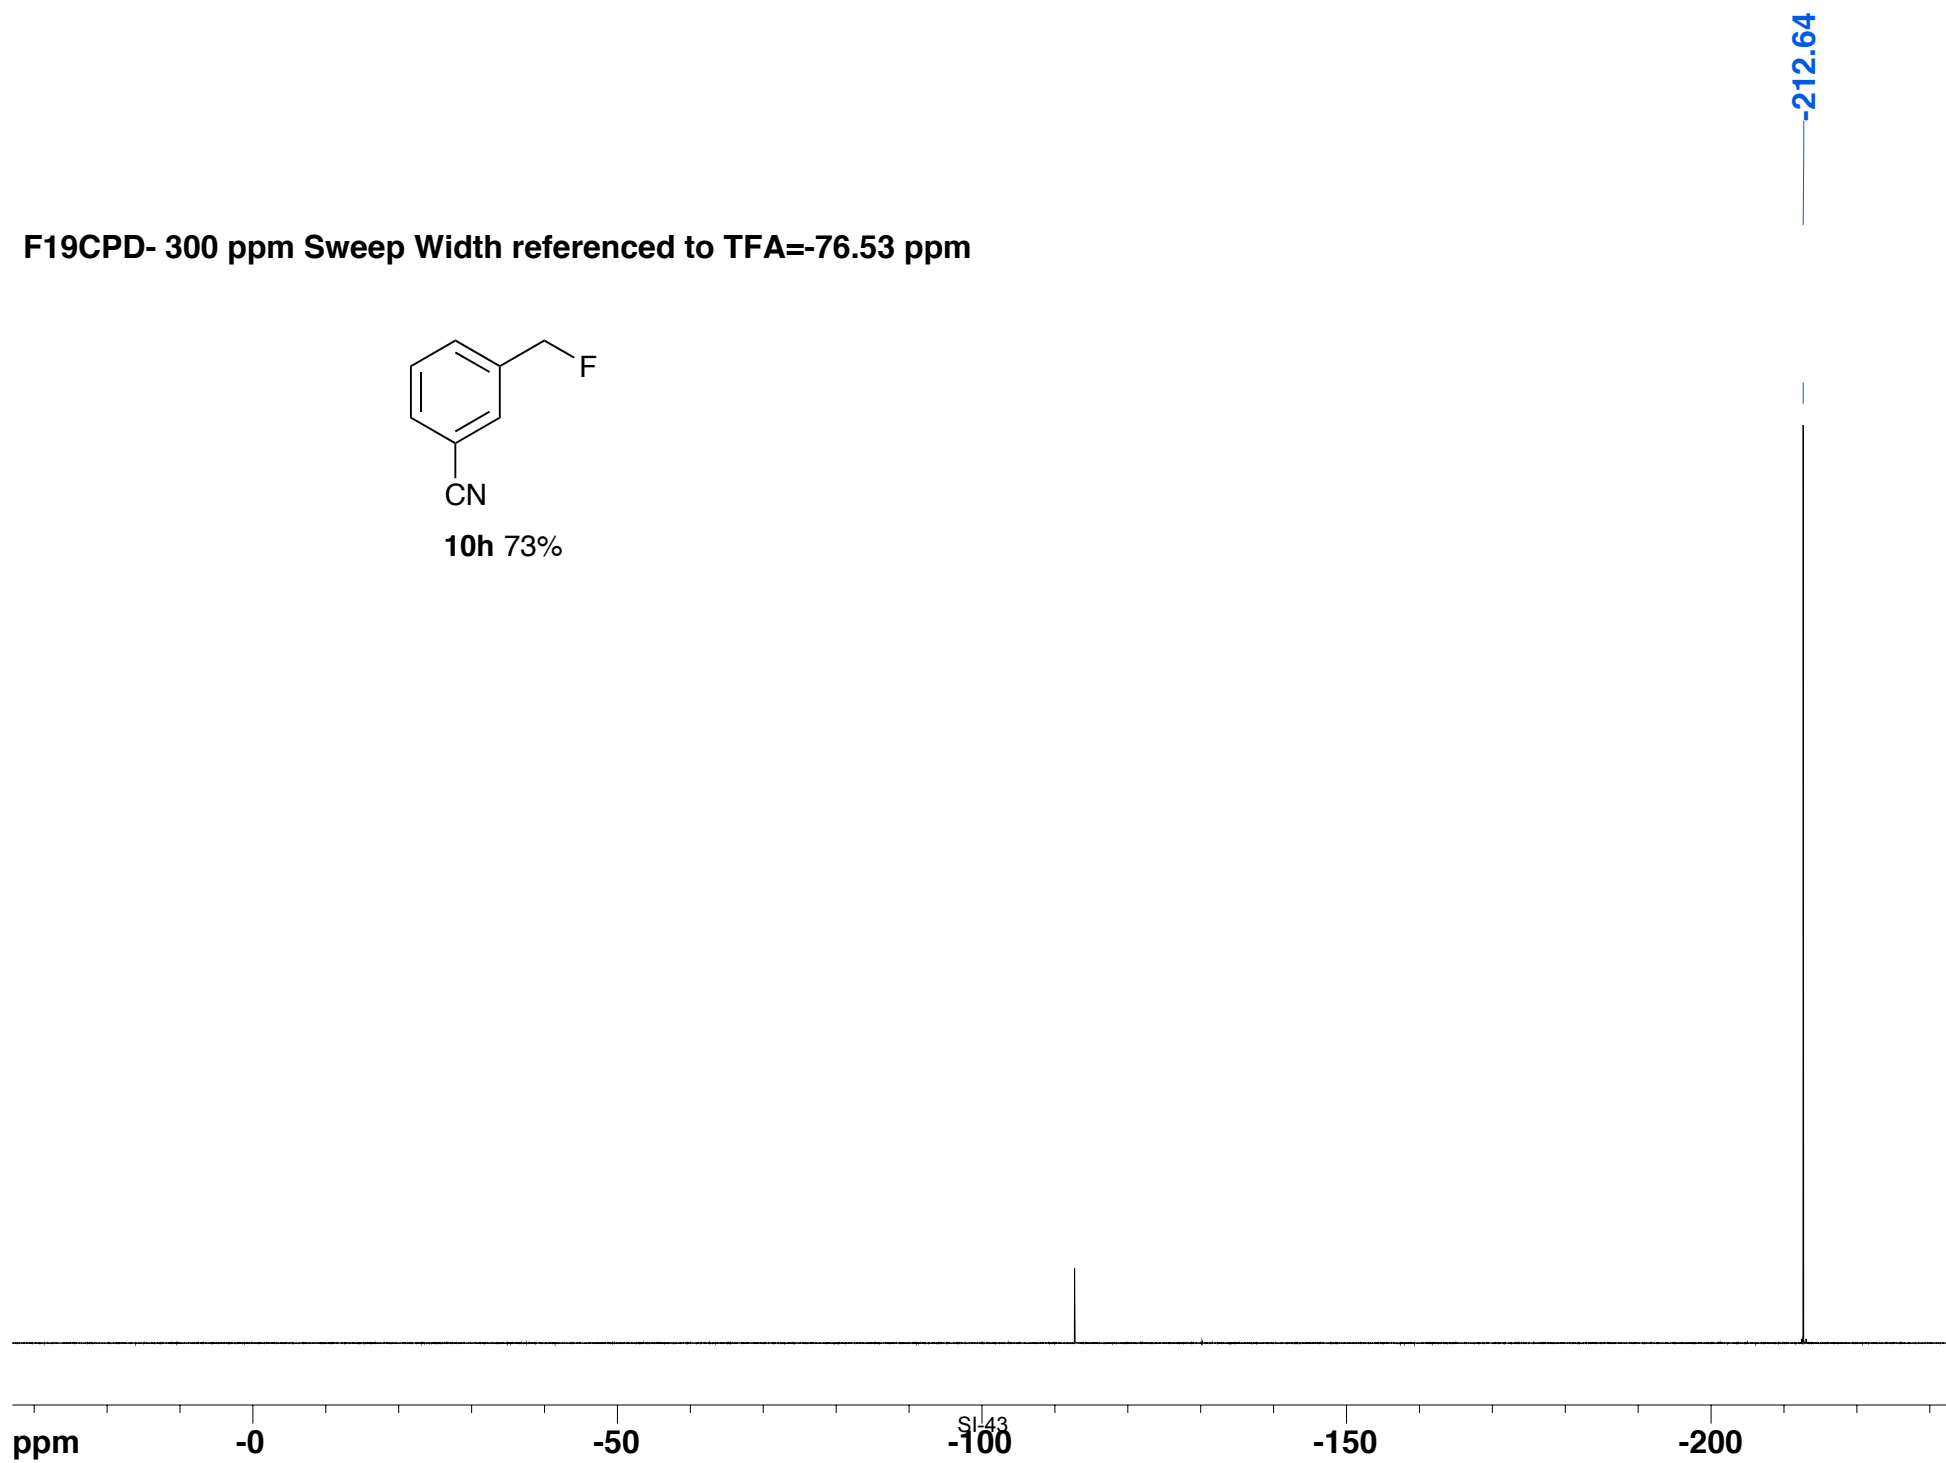

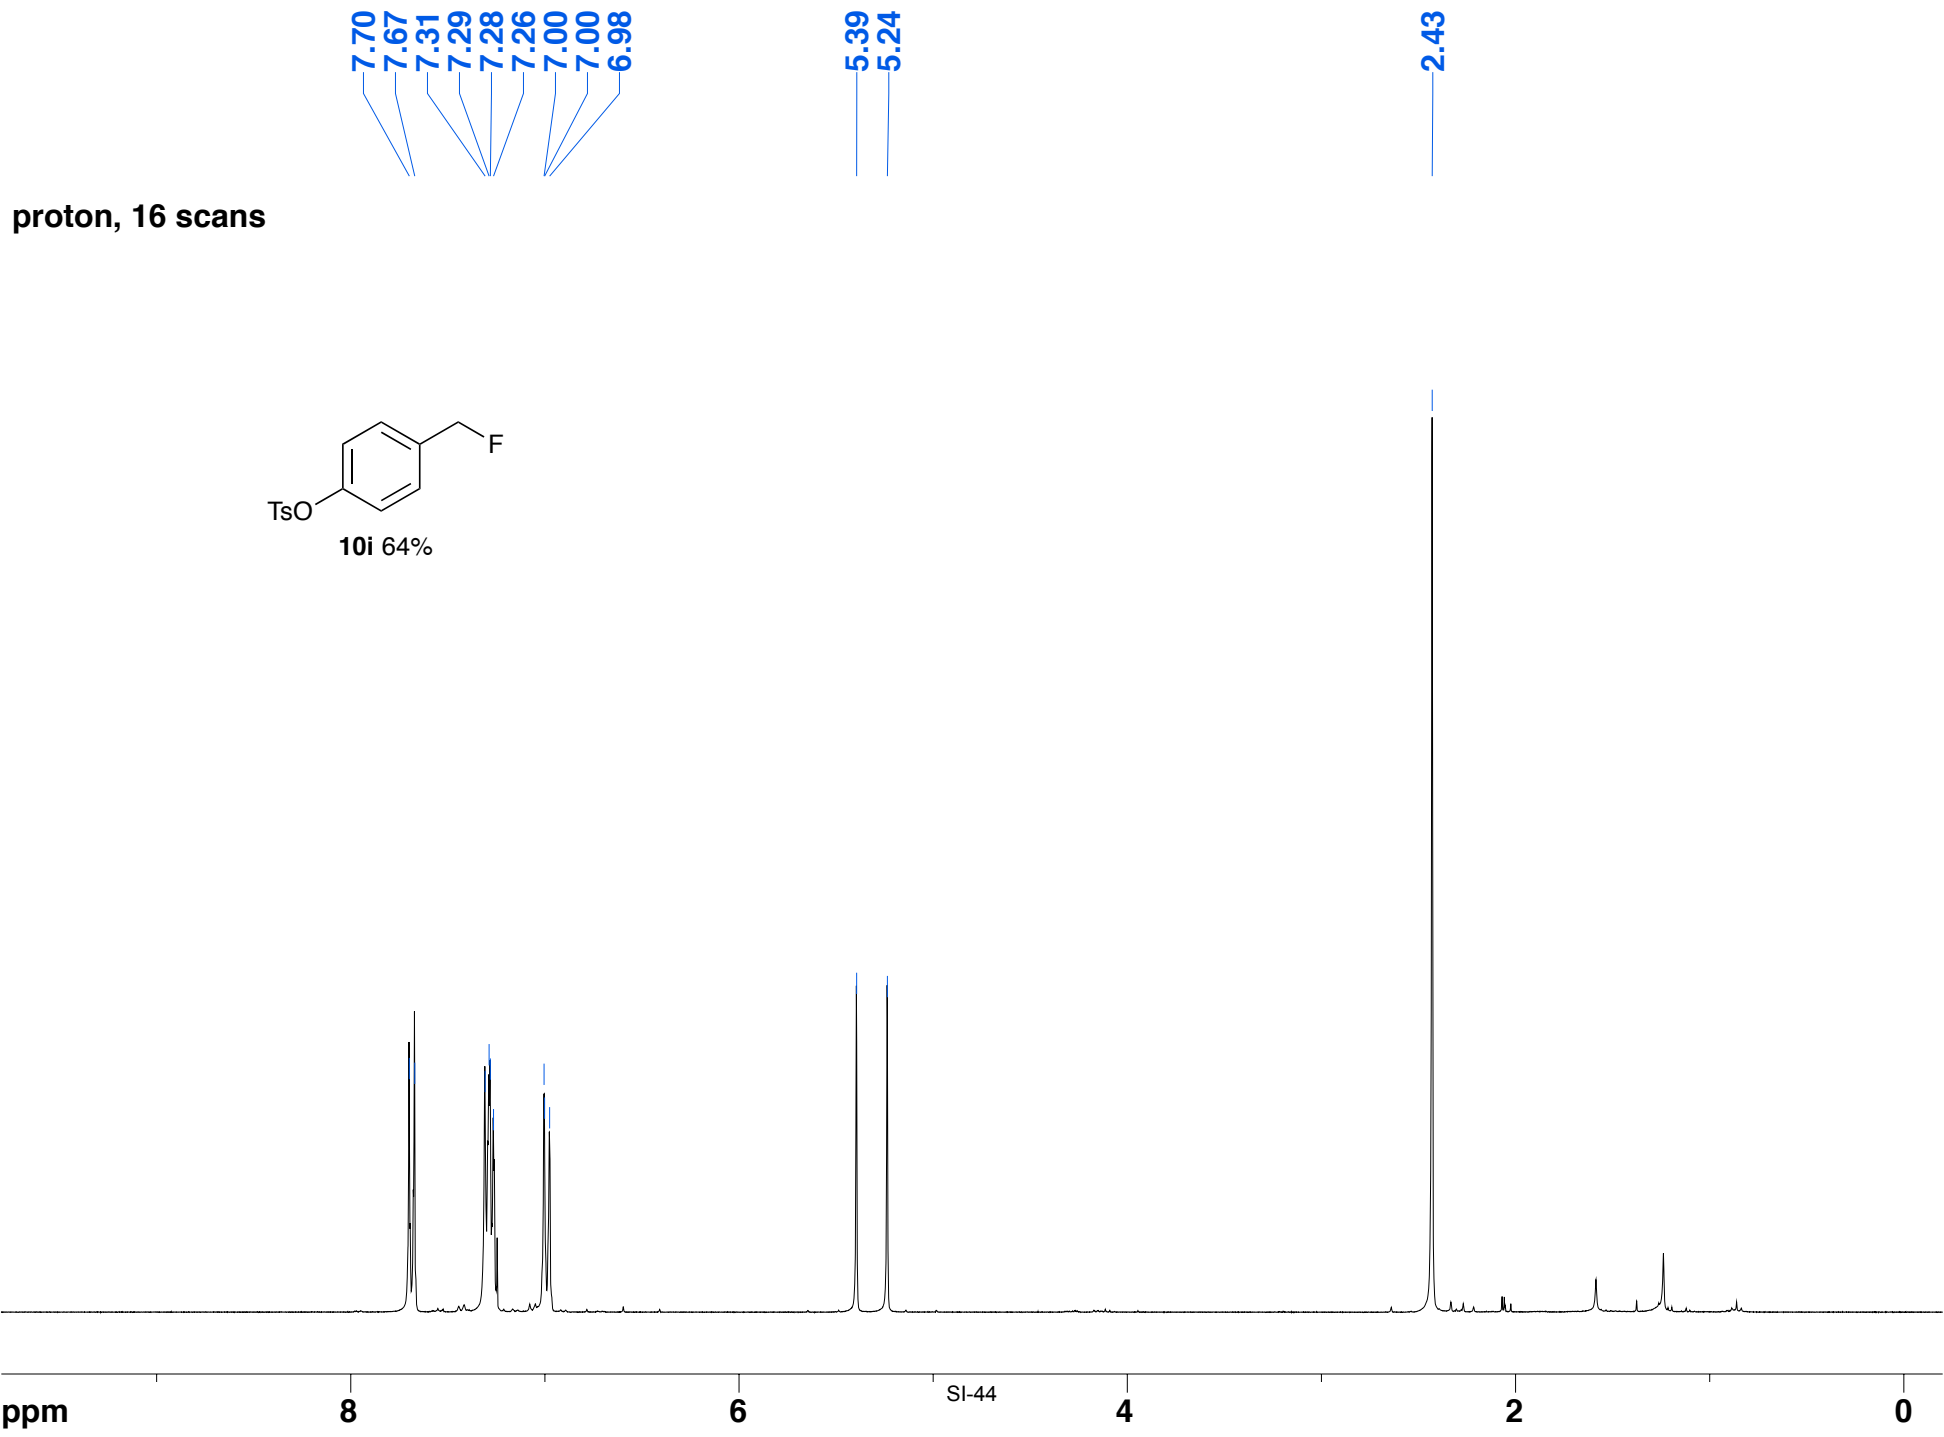

C-13 proton Decoupled

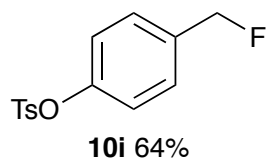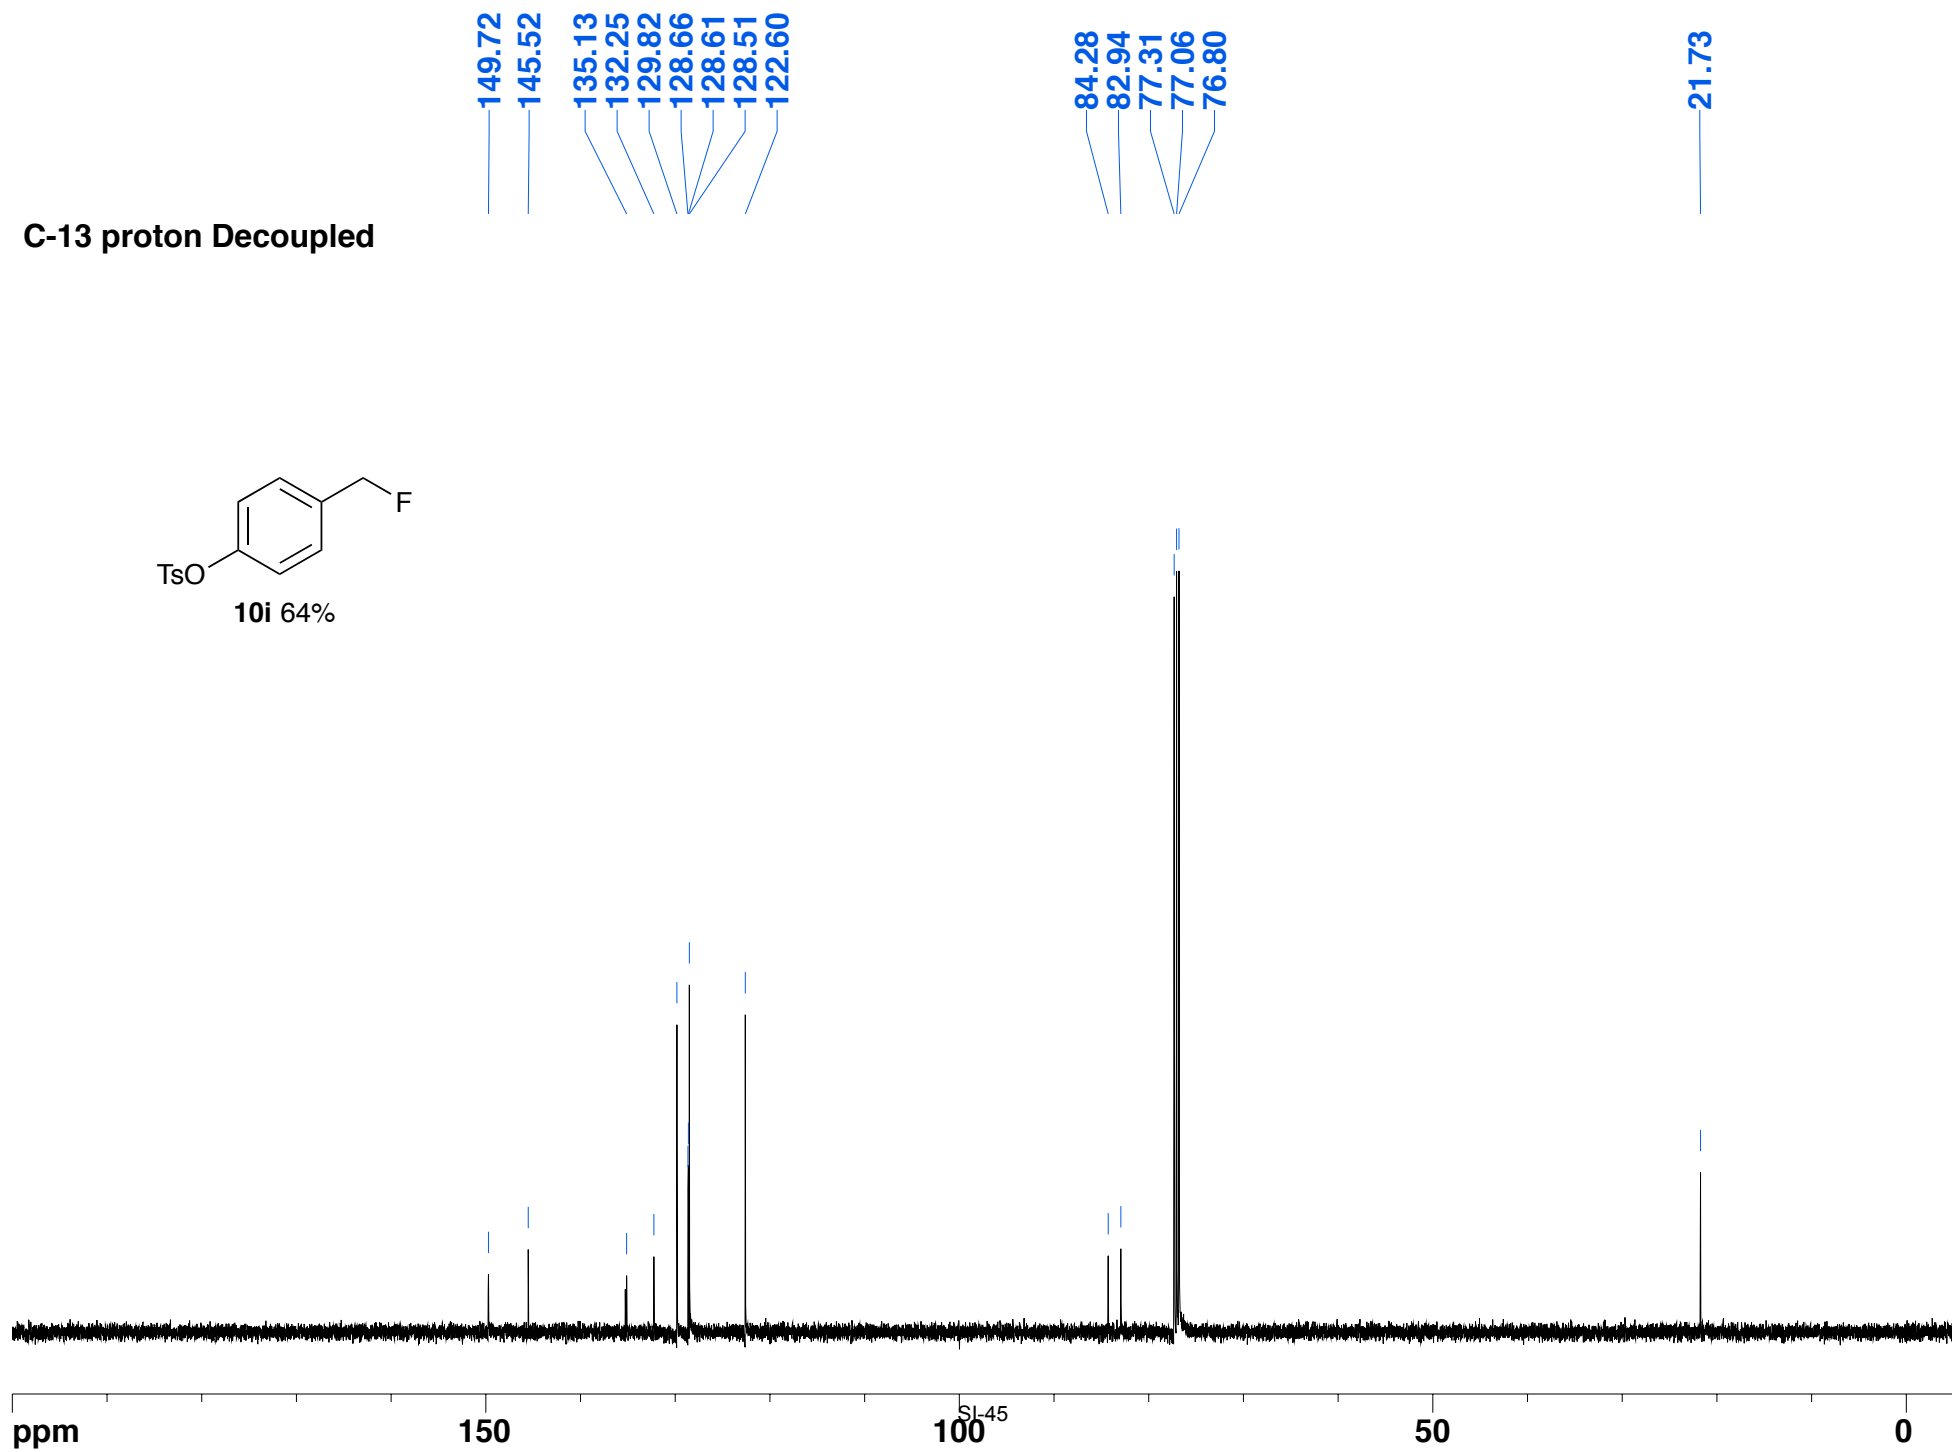

F19CPD- 300 ppm Sweep Width referenced to TFA=-76.53 ppm

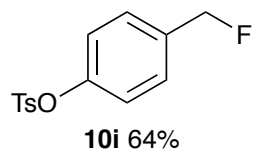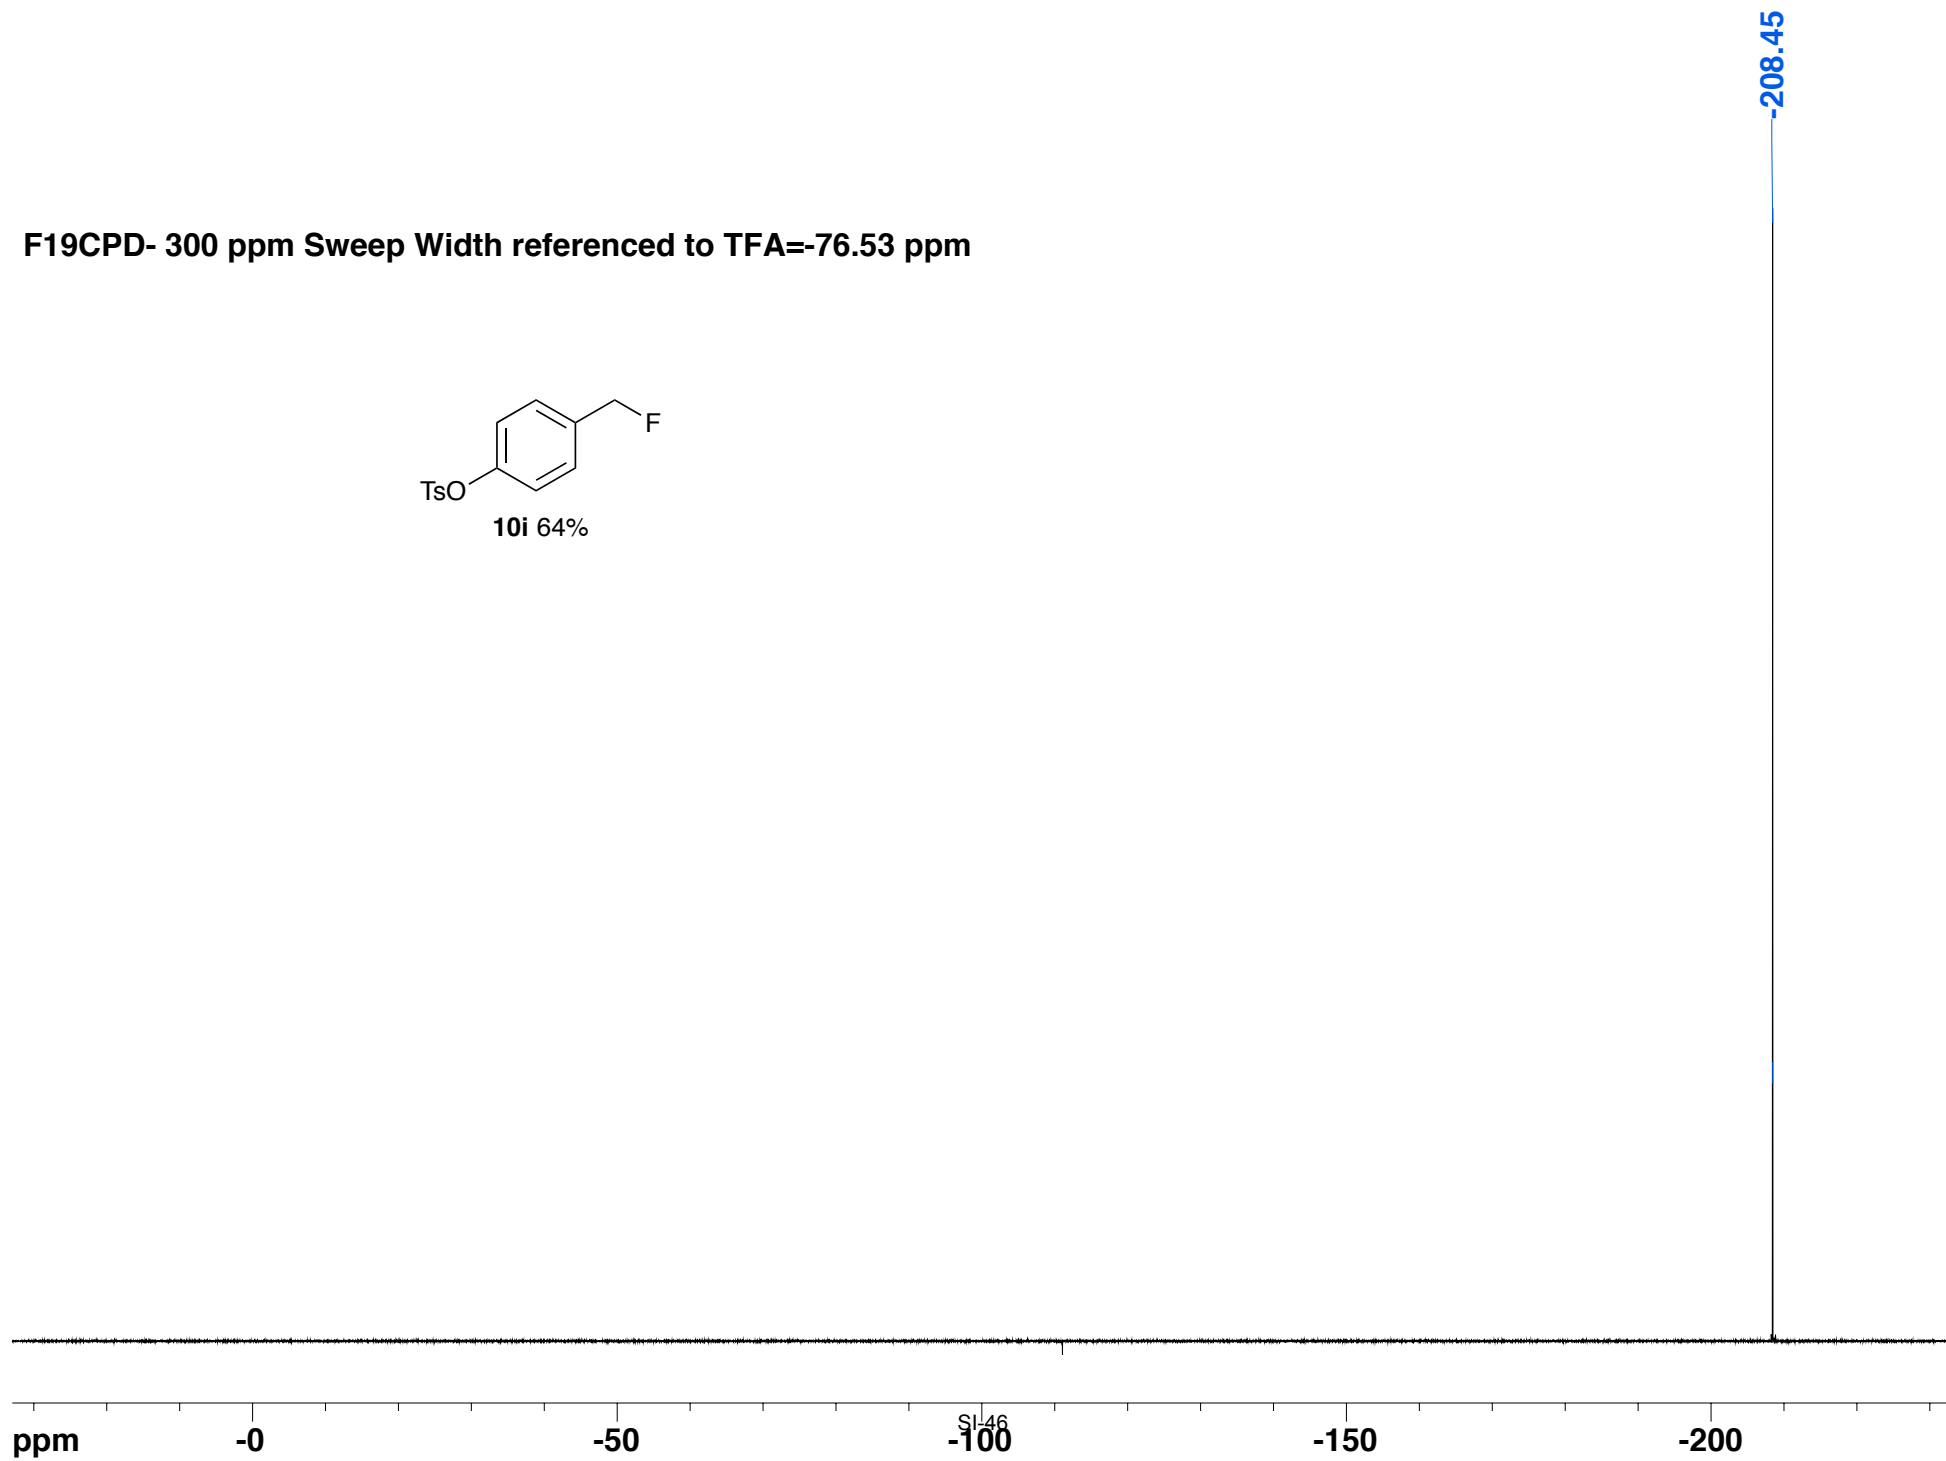

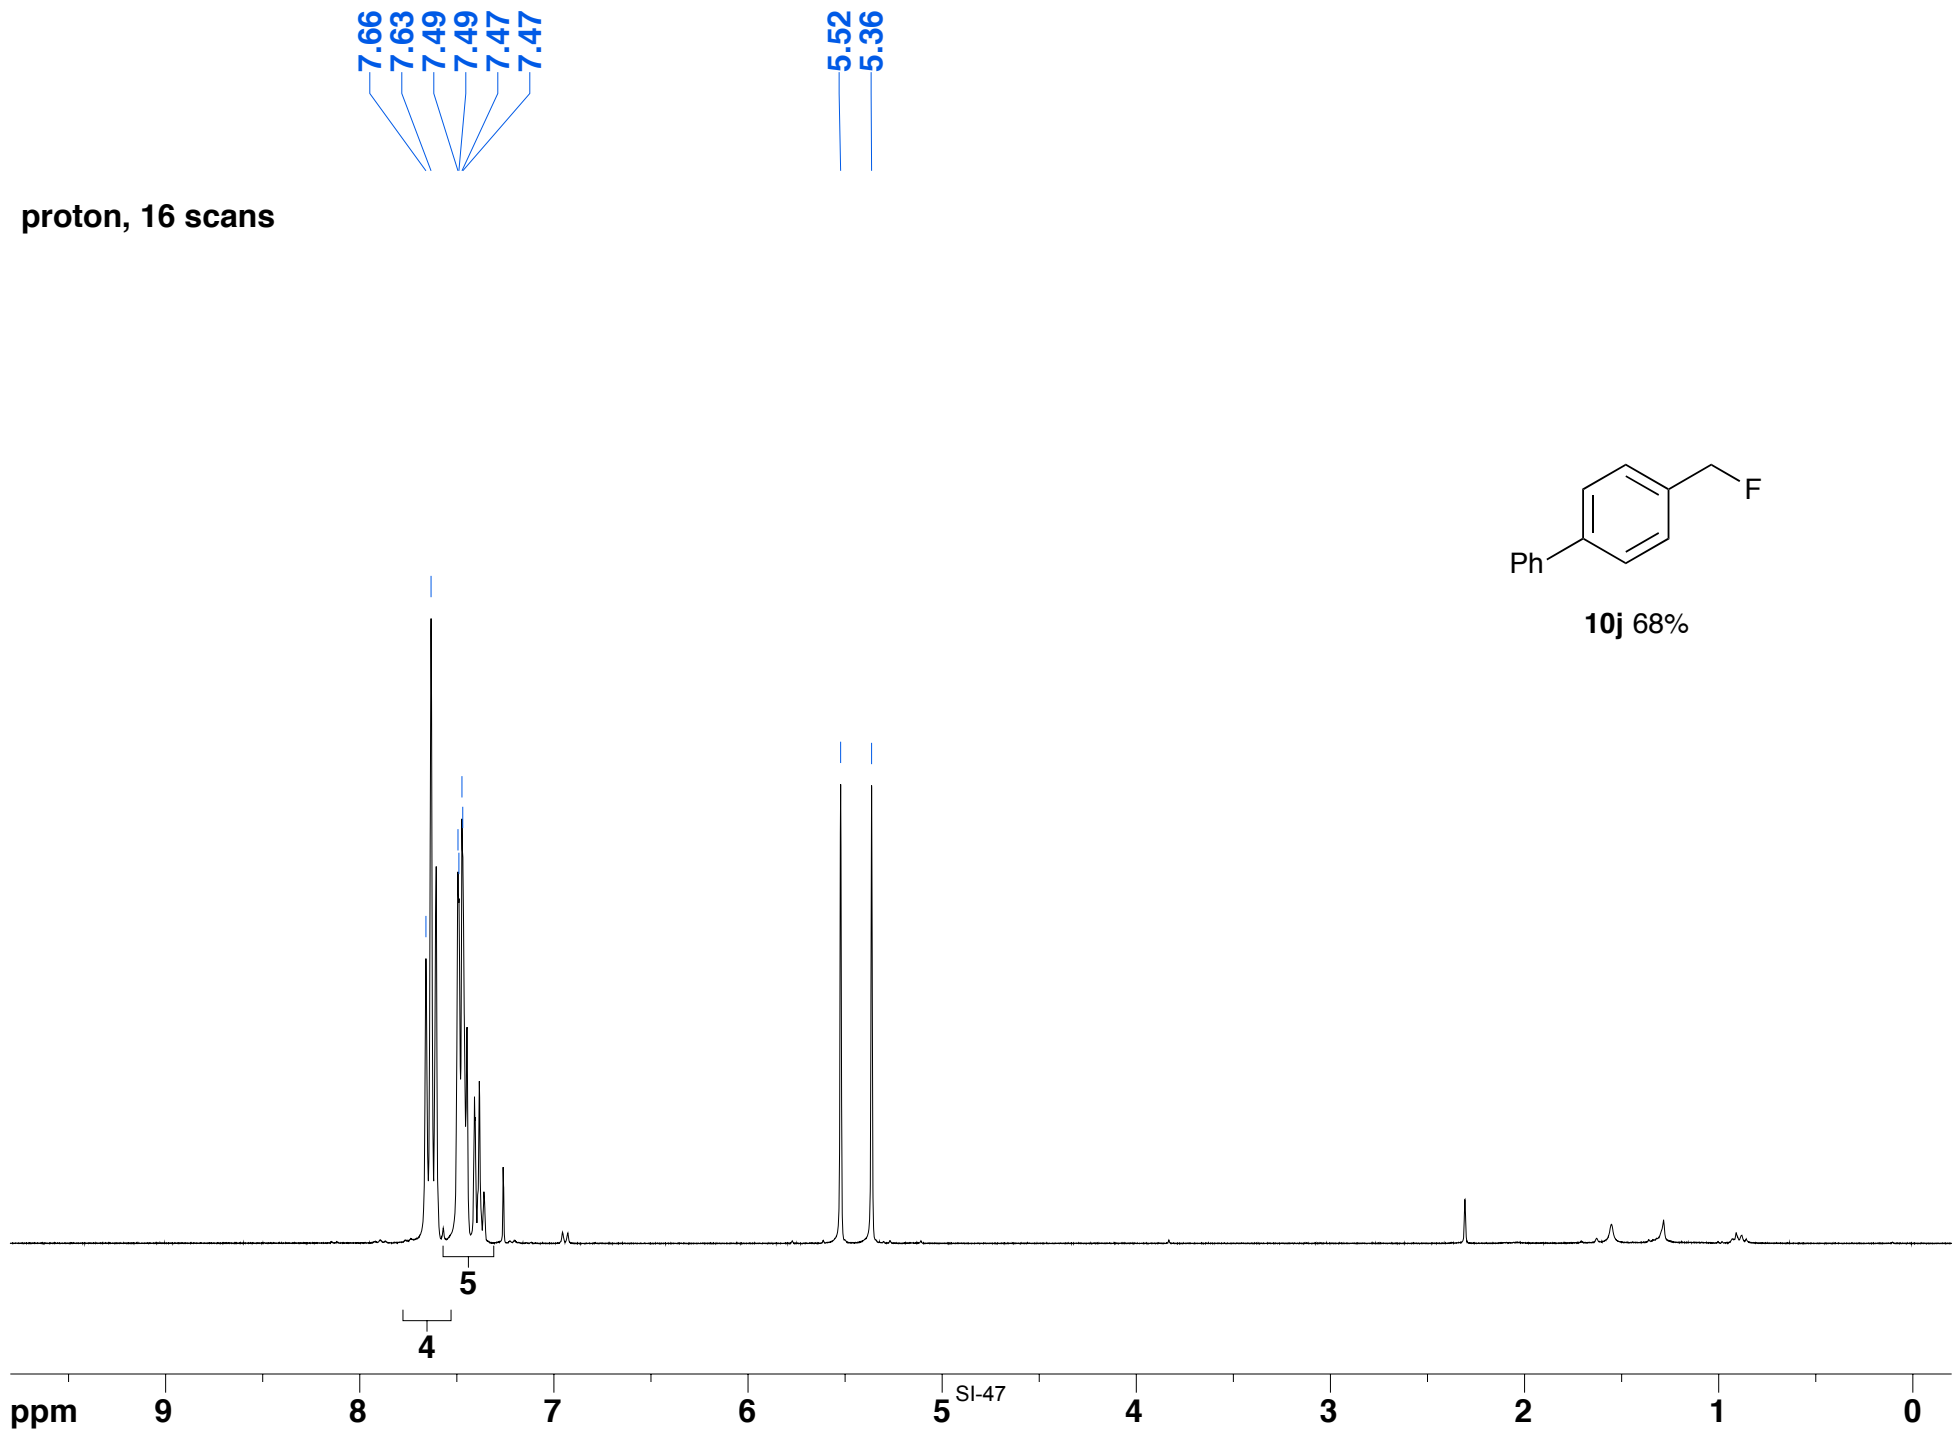

**C-13 proton Decoupled**

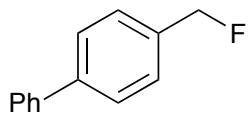

**10j 68%**

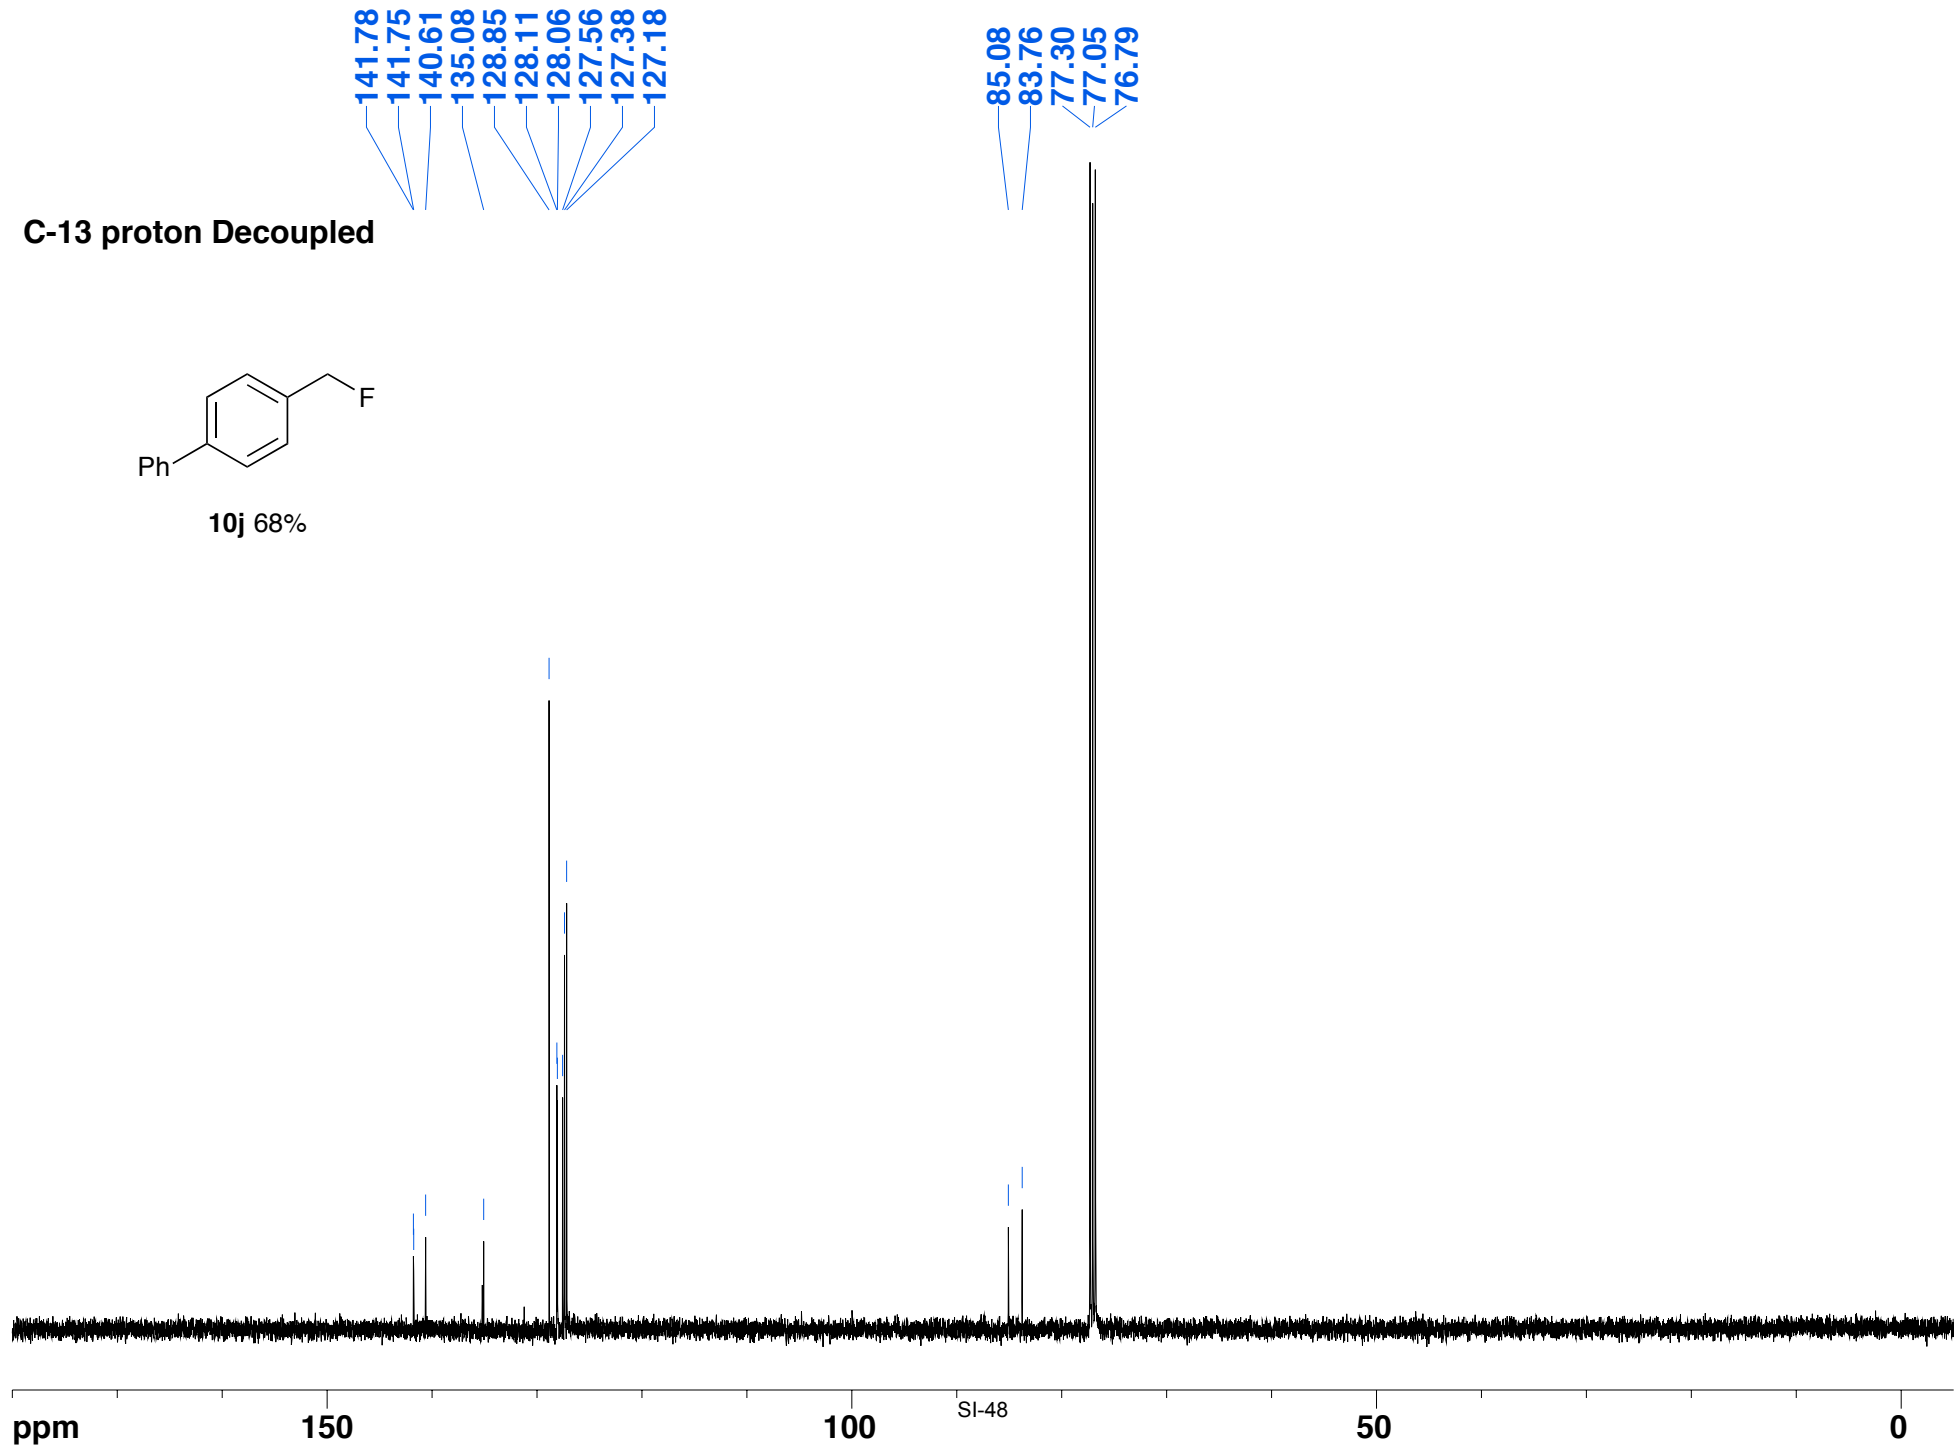



F19CPD- 300 ppm Sweep Width referenced to TFA=-76.53 ppm

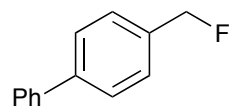

10j 68%

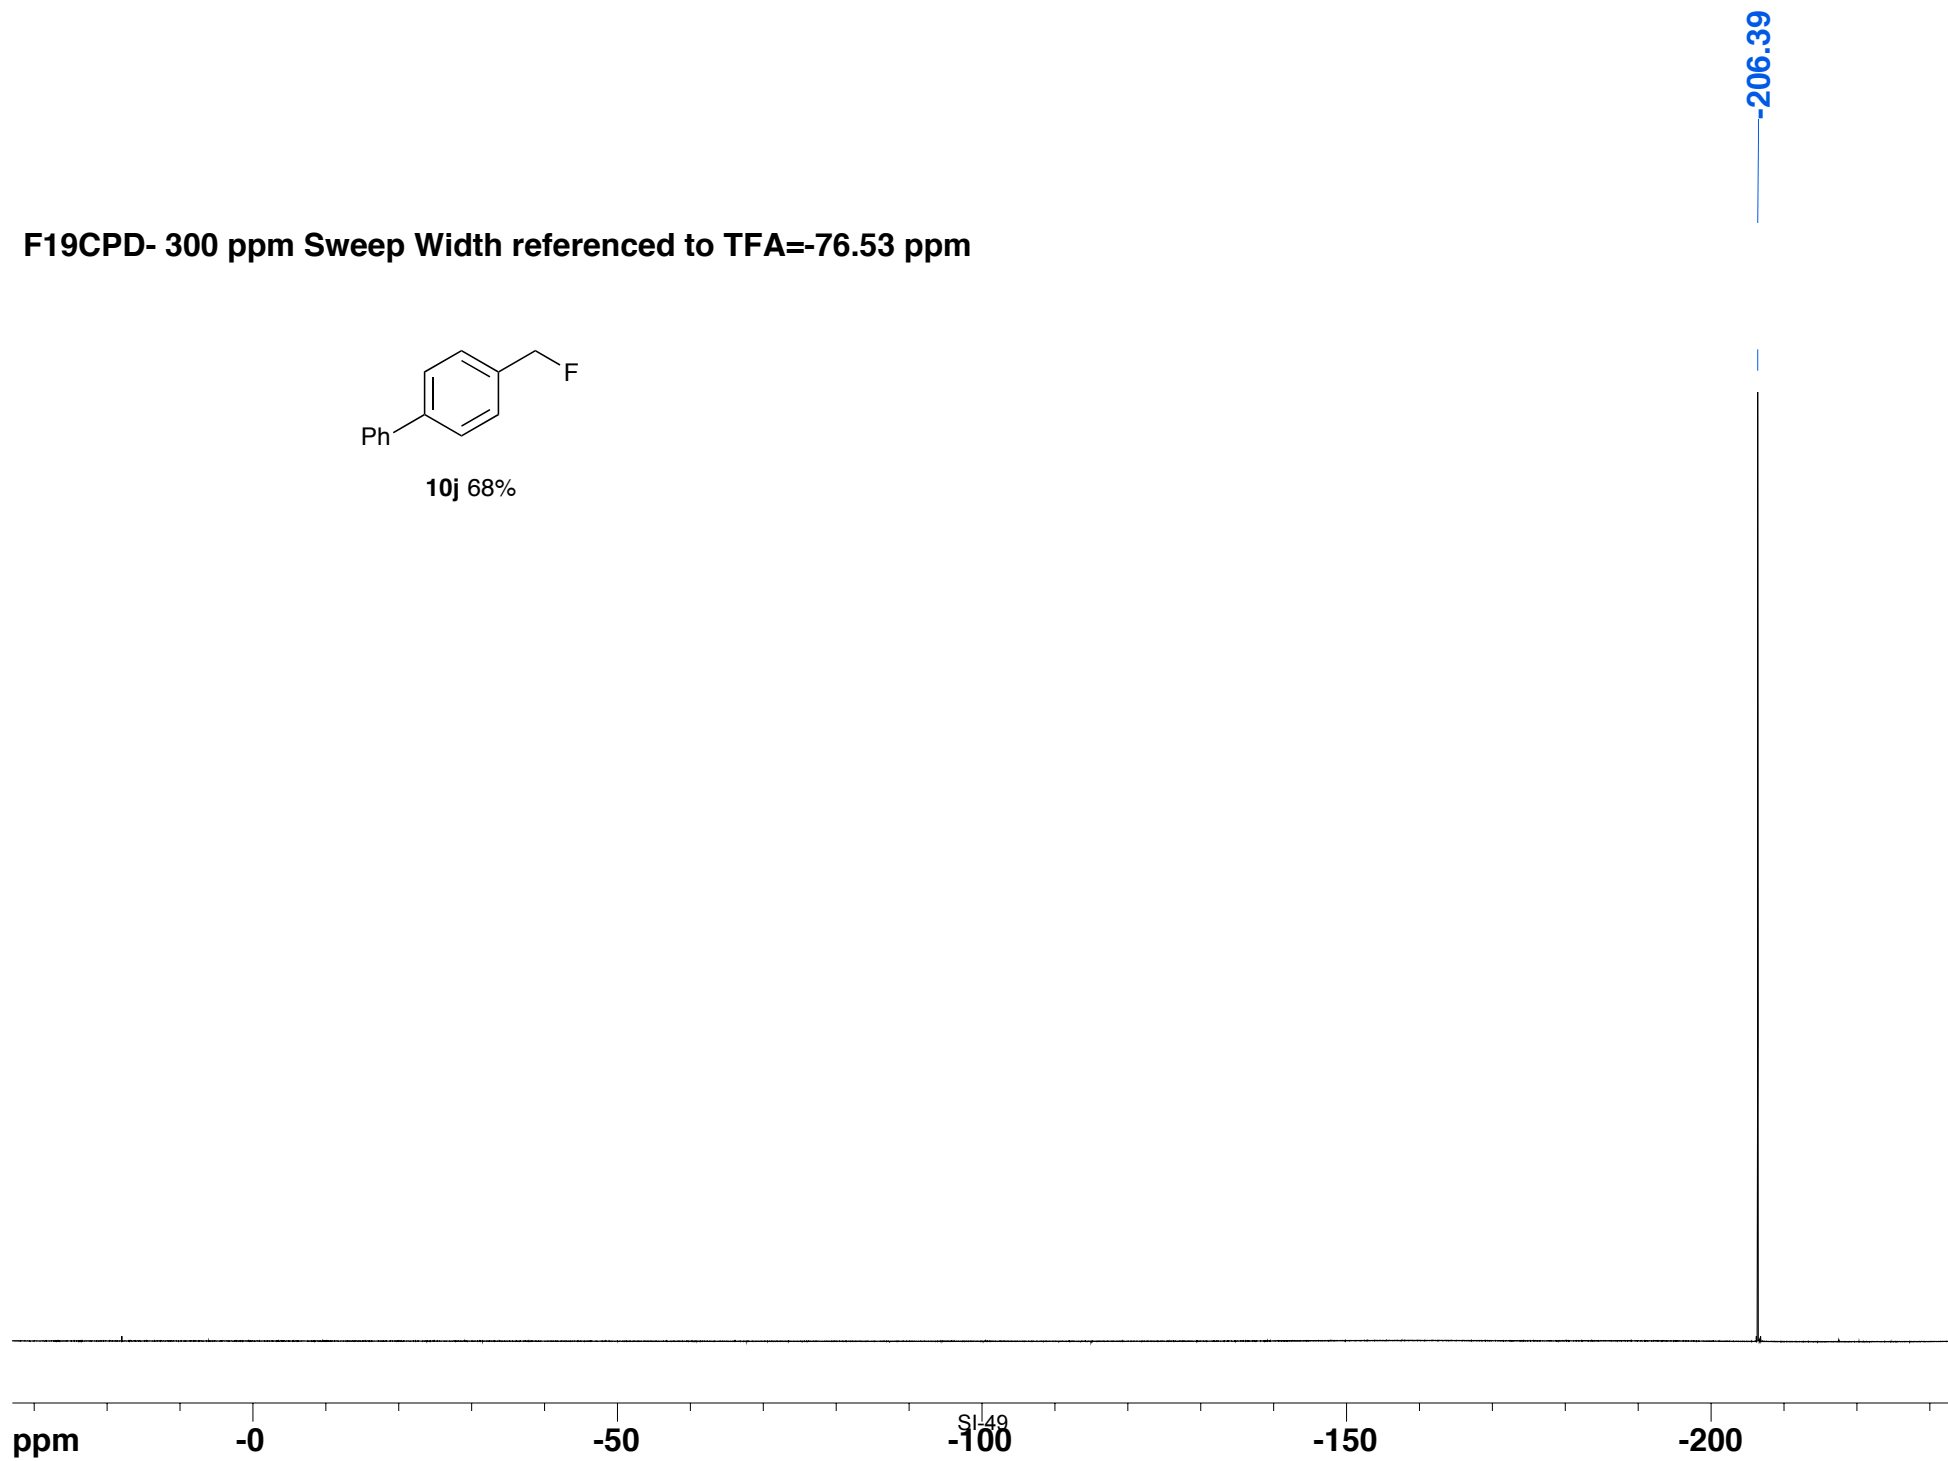

7.51  
7.50  
7.48  
7.48  
7.28  
7.24  
7.21

5.44  
5.28

proton 16 scans AVANCE 300B

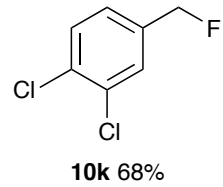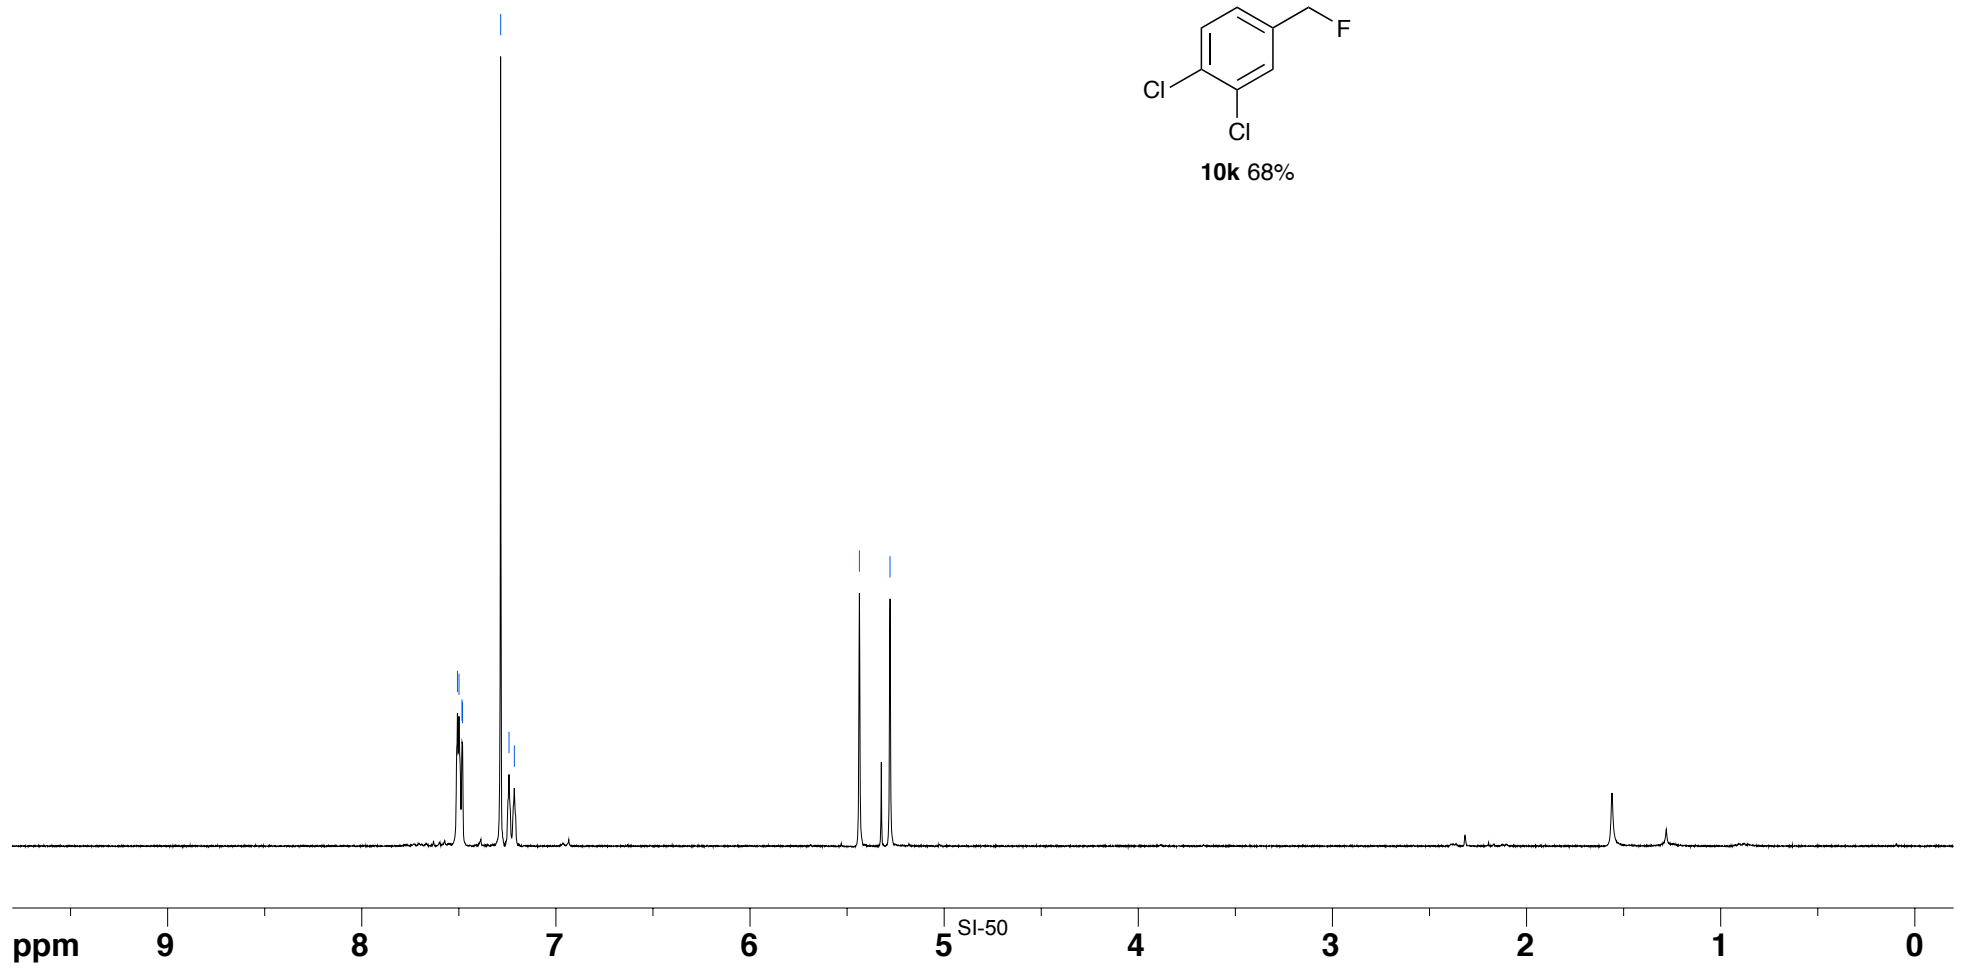

<sup>19</sup>CPD- 300 ppm Sweep Width referenced to TFA=-76.53 ppm

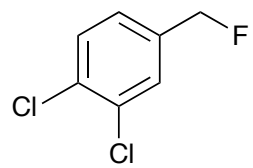

10k 68%

ppm -0

-50

-100

SI-51

-150

-200

-210.38

7.30  
6.92

5.44  
5.28

3.82

proton, 16 scans

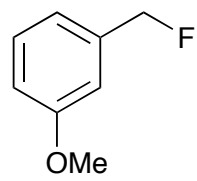

10n 33%

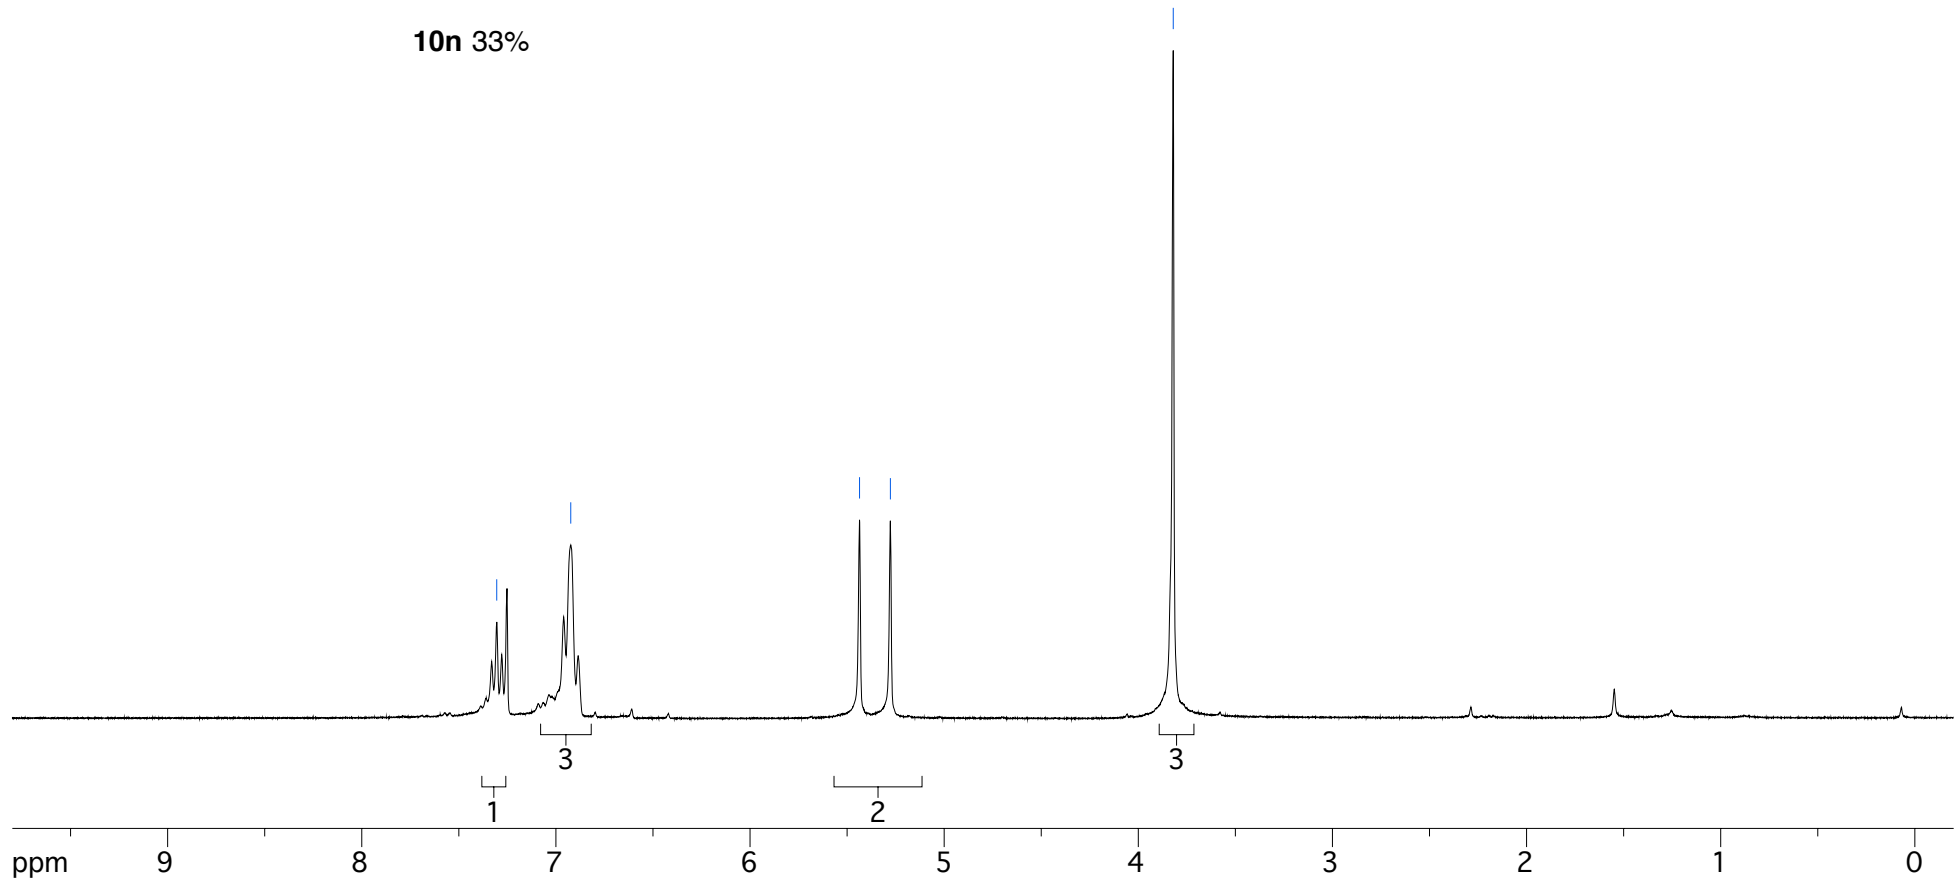

F19CPD- 300 ppm Sweep Width referenced to TFA=-76.53 ppm

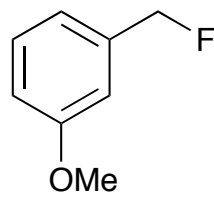

10n 33%

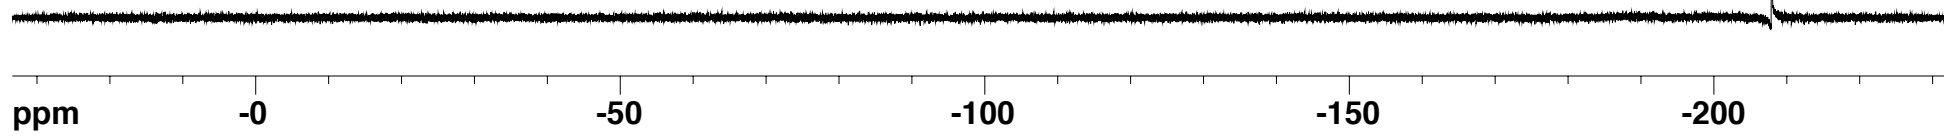

7.48  
7.46  
7.46  
7.42  
7.34  
7.05  
7.01  
6.99

5.47  
5.31  
5.12

proton 16 scans AVANCE 300B

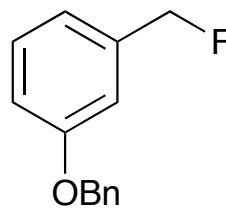

**10o** 45%

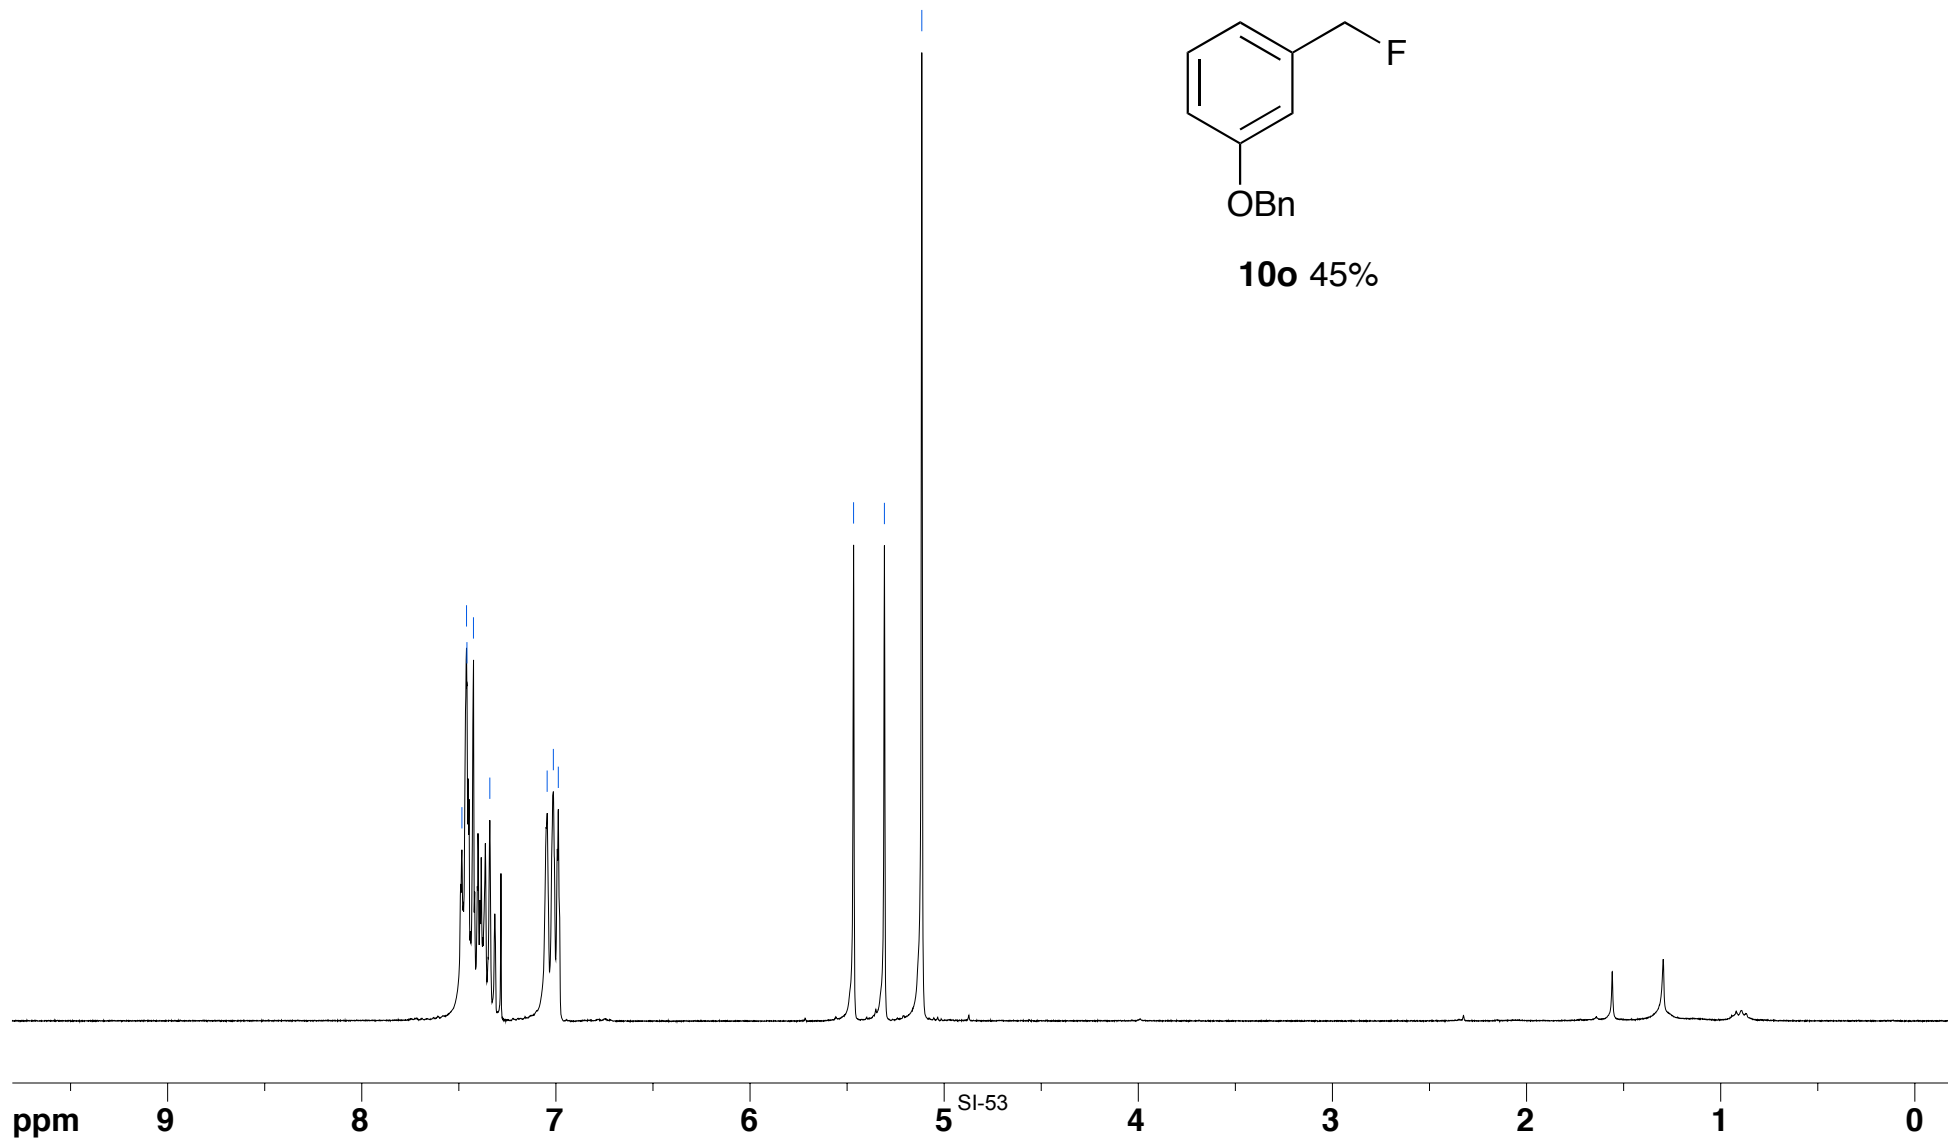

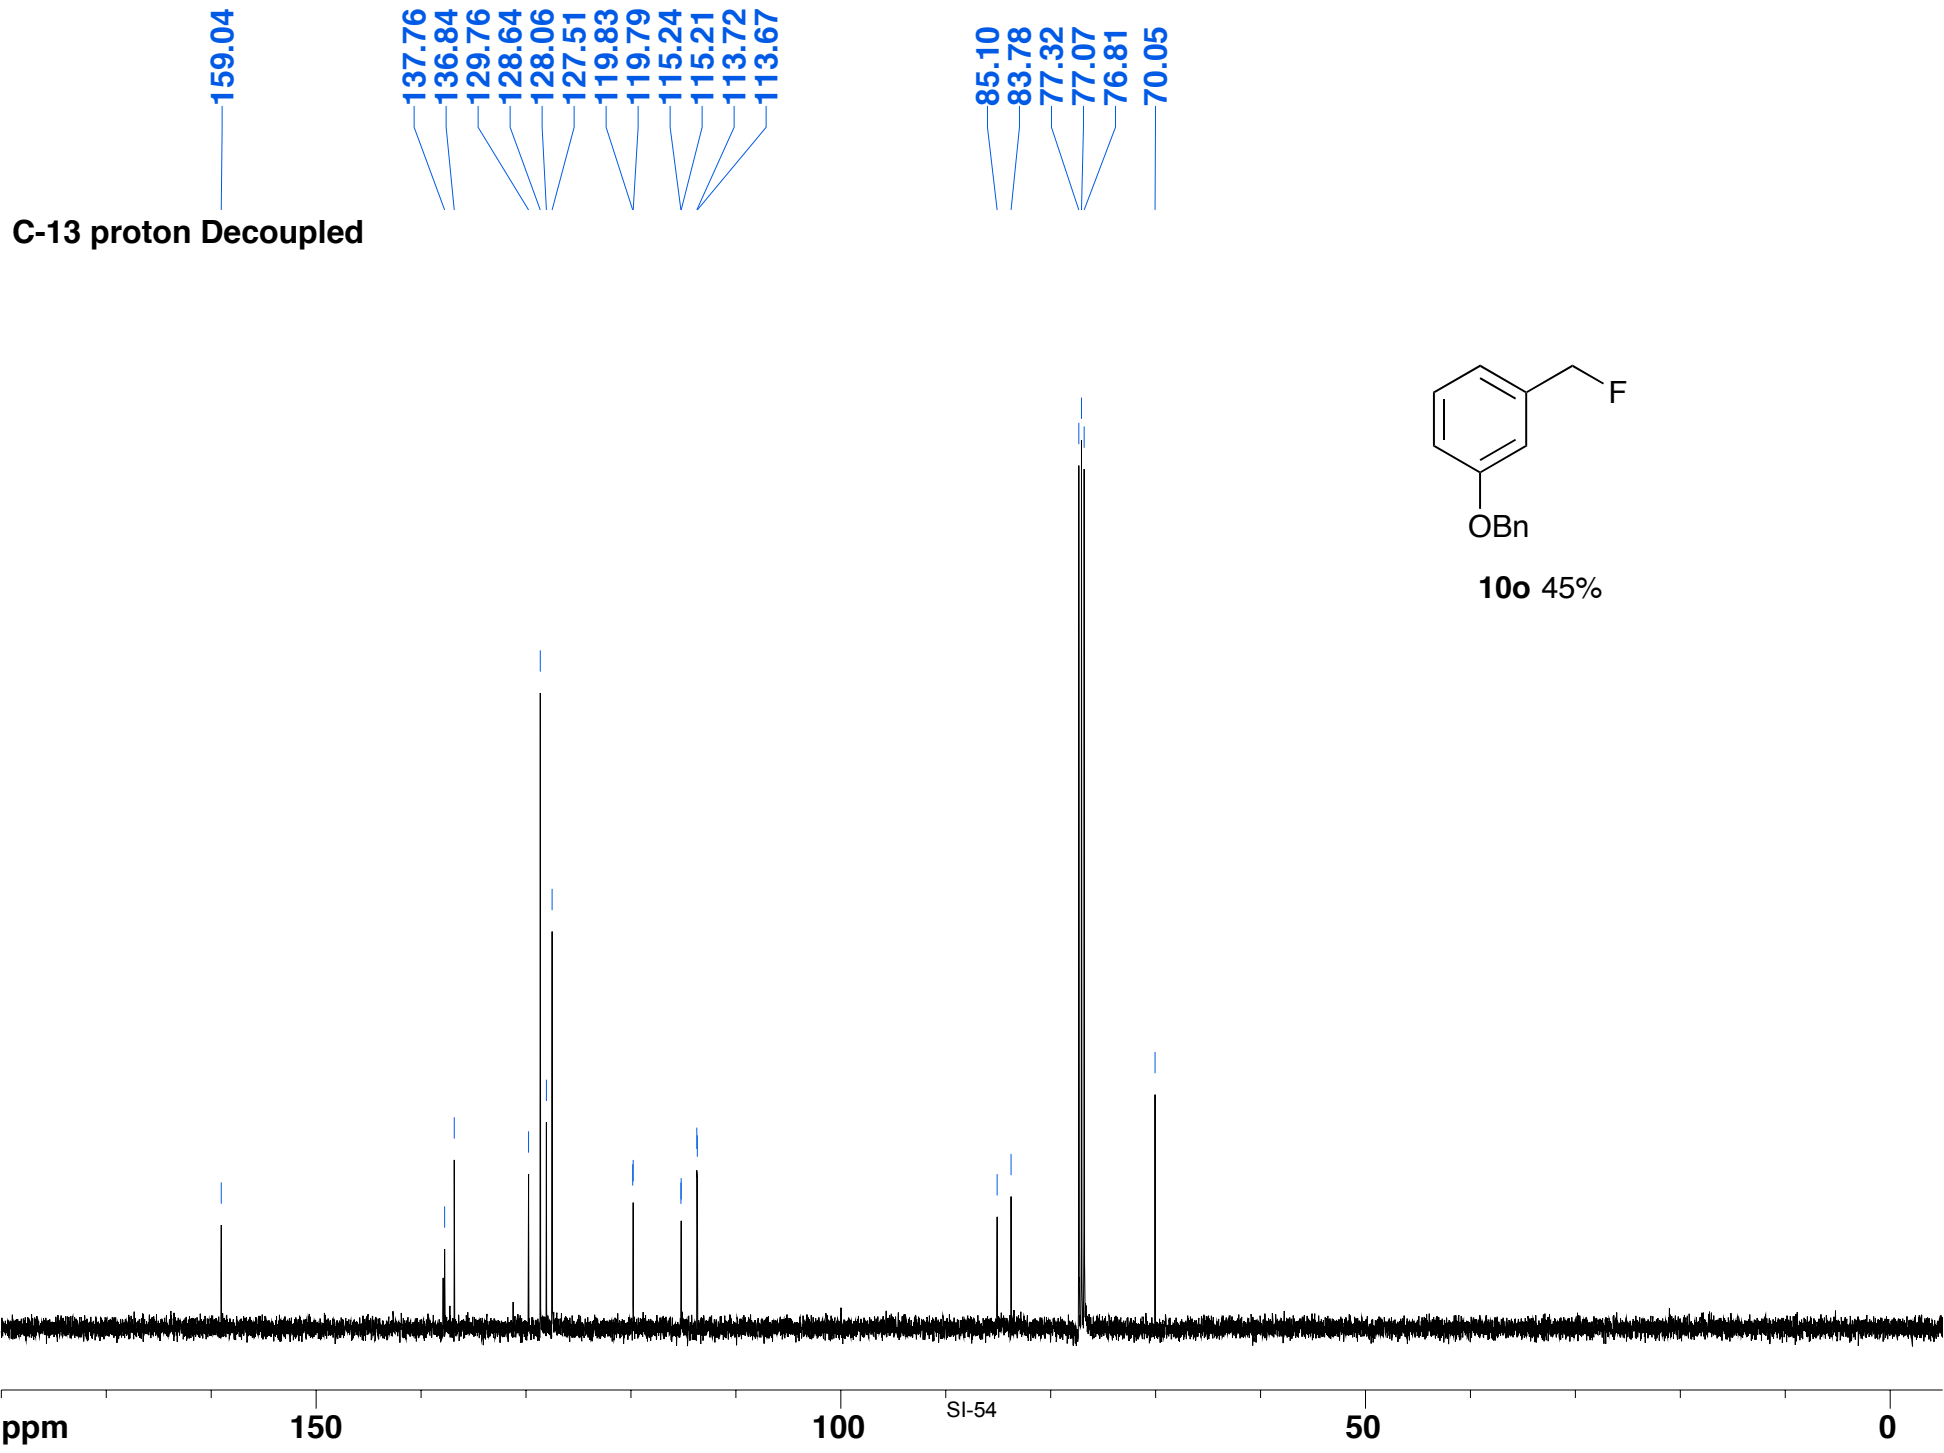

F-19 Observed H1 Decoupled Sweep Width 210 ppm

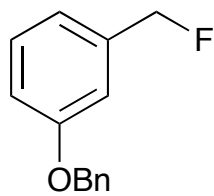

**10o** 45%

ppm -0 -50 -100 -150 -200

SI-55

-208.03



7.48  
7.44  
7.41  
7.40  
7.37  
6.78  
6.78  
6.75  
6.75

5.48  
5.33

3.83

proton, 16 scans

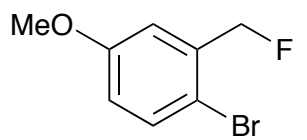

10p 47%

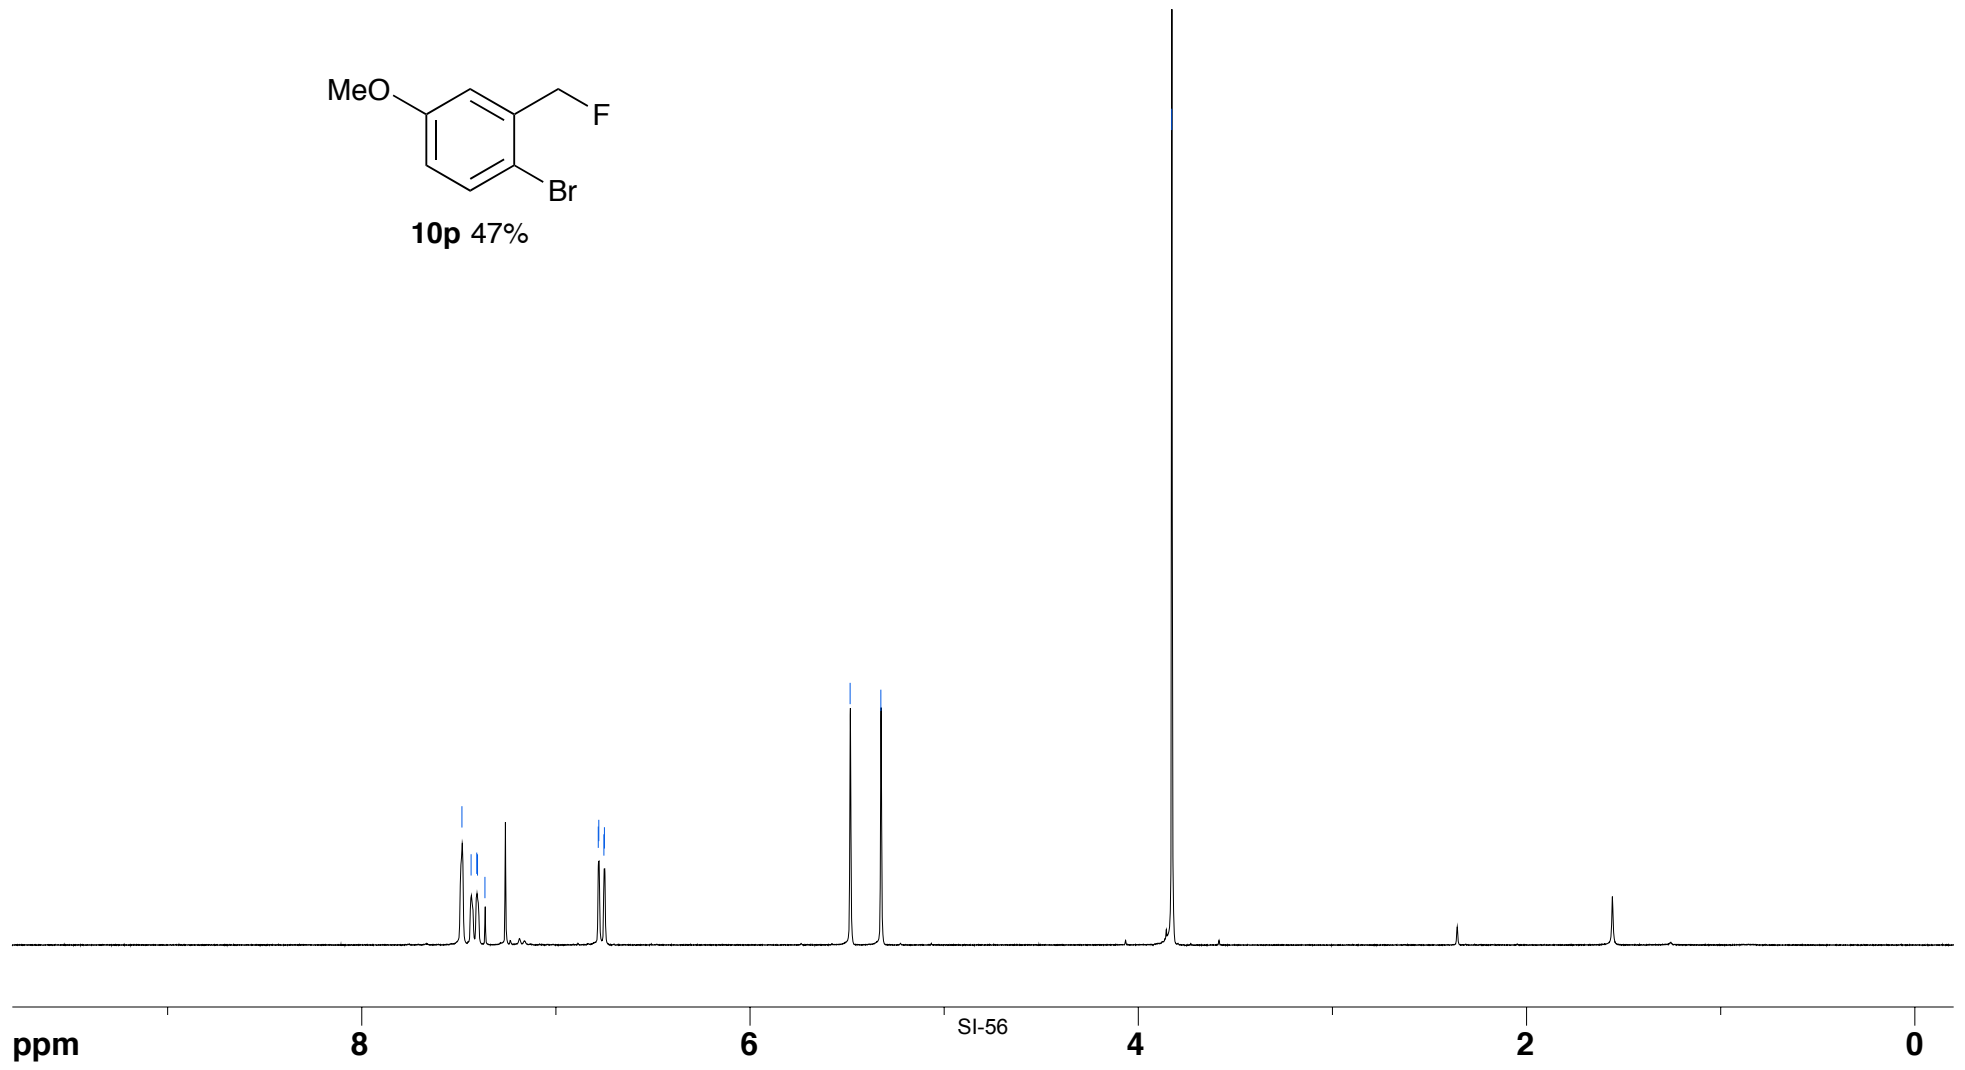

F19CPD- 300 ppm Sweep Width referenced to TFA=-76.53 ppm

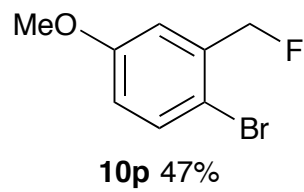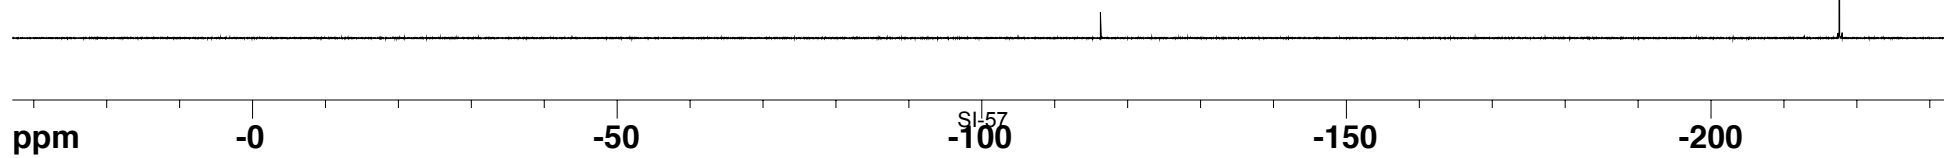

155.94  
155.91

132.37  
132.35  
131.29  
131.21  
127.03  
126.89

112.73  
112.02

80.30  
78.97  
77.27  
77.02  
76.77

55.65

**C-13 proton Decoupled**

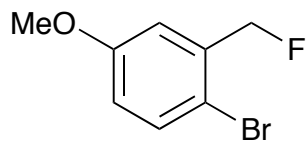

**10p** 47%

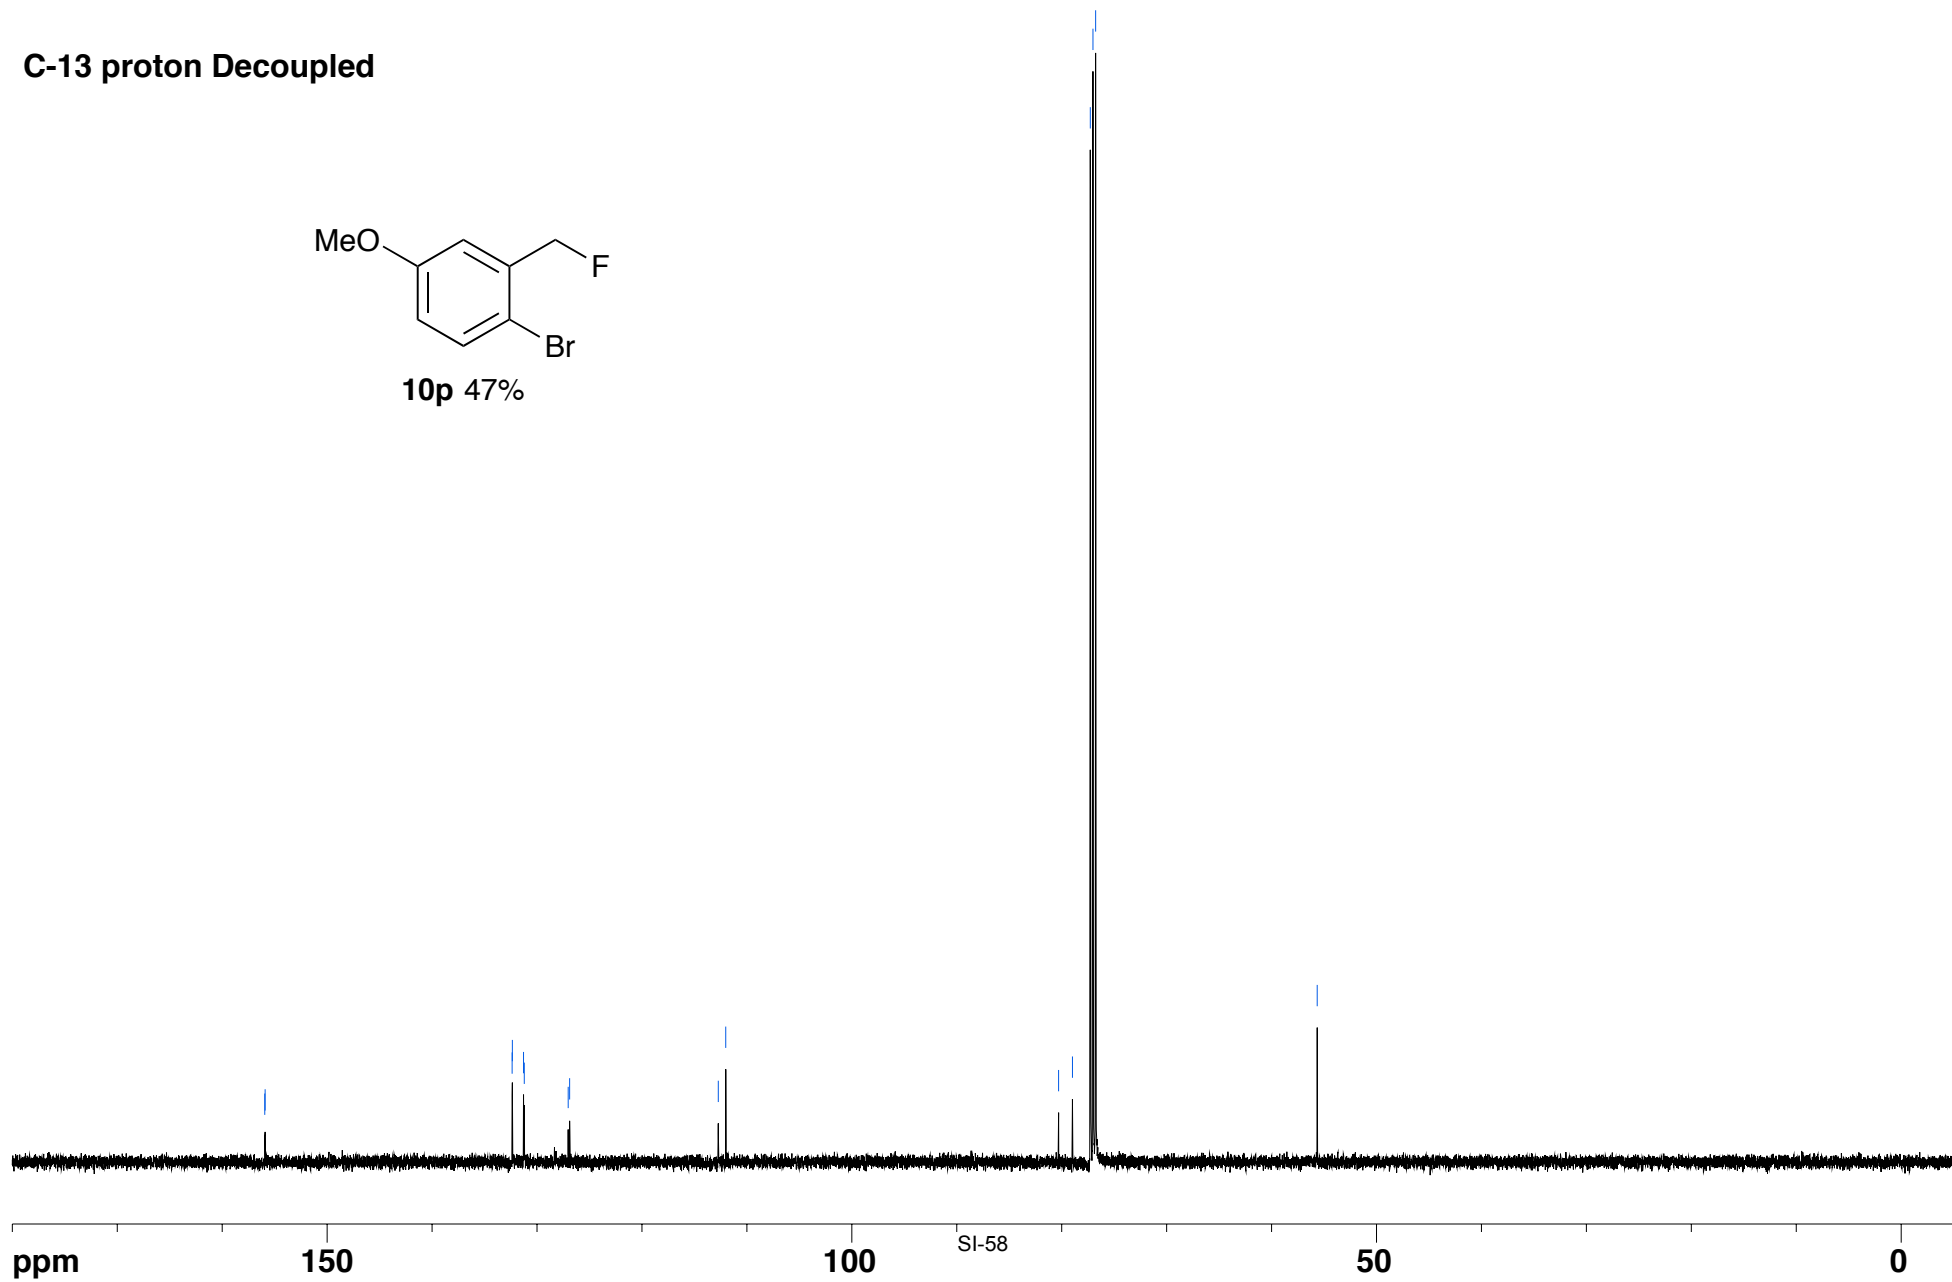

Supplement: c6ob02074g1.pdf [file c6ob02074g1.pdf]
